# Supplementary material for: Personalized tumor combination therapy optimization using the single-cell transcriptome
Source: Genome Med. 2023 Dec 1;15:105. doi: 10.1186/s13073-023-01256-6 (PMC10691165; doi:10.1186/s13073-023-01256-6)
Supplement: Supplementary file 2 — Additional file 2: Table S1. Summary of tumor single cell RNA-seq datasets. Table S2. Details of tumor single cell RNA-seq datasets and comboSC results. Table S3. Details of drugs from GDSC database used in comboSC. Table S4. Details of drugs from CMAP database used in comboSC. Table S5. Tres score predictions and immunotherapy responses of all datasets in Fig. 2e-i. Table S6. Top 50 comboSC predictions for low and middle immune score samples. Table S7. ICB combinatory treatment sample information. [file 13073_2023_1256_MOESM2_ESM.xlsx]

## Sheet: Table S1
Table S1. Summary of tumor single cell RNA-seq datasets
Cancer	Number of samples	PMID of reference
BCC	6	31359002
BRCA	1	bioRxiv
	1	34493872
CRC	7	32302573
	5	32505533
HNSC	11	29198524
NSCLC	4	31033233
	3	32103181
	5	31979687
	2	32675368
	3	bioRxiv
PAAD	23	31273297
SKCM	1	29198524
	5	30388455
	1	30250229
	6	27124452
LIHC	1	32103181
	1	31675496
	4	31588021
AML	1	34493872
	4	32692727
UCEC	2	32103181
OS	4	34367994
UVM	7	31980621
KIRC	1	33504936
SS	5	33495604
THCA	5	33462507

## Sheet: Table S2
Table S2. Details of tumor single cell RNA-seq datasets and comboSC results.
Dataset Name	Patient id	Patient id in origin study	Platform	Cancer Type	Immunotherapy	No. of cells	Tres score level	ComboSC recommendation	PMID	Reference
GSE116256	1	AML328	Smart-seq2	AML	PD-L1	2028	Low	Bleomycin + Torin 2，IMD-0354 + Torin 2，IMD-0354 + Bleomycin	29740158	Single-cell sequencing reveals the origin and the order of mutation acquisition in T-cell acute lymphoblastic leukemia
GSE154109	1	P5	10x Genomics	AML	-	1912	Low	SN-38 + Gemcitabine，Dinaciclib + Gemcitabine，Bleomycin + Gemcitabine +H18	32692727	Risk-associated alterations in marrow T cells in pediatric leukemia
GSE154109	2	P3	10x Genomics	AML	-	1034	Low	GSK1059615 + Obatoclax Mesylate，Sepantronium bromide + Obatoclax Mesylate，Apitolisib + Obatoclax Mesylate	32692727	Risk-associated alterations in marrow T cells in pediatric leukemia
GSE154109	3	P6	10x Genomics	AML	-	1071	Middle	cefapirin,H19mycophenolic acid,bretylium tosilate	32692727	Risk-associated alterations in marrow T cells in pediatric leukemia
GSE154109	4	P7	10x Genomics	AML	-	1129	High	mono-immunotherapy	32692727	Risk-associated alterations in marrow T cells in pediatric leukemia
GSE123813	1	su001	10x Genomics	BCC	PD-L1	1133	Middle	calmidazolium，azacyclonol，terfenadine	31359002	Clonal replacement of tumor-specific T cells following PD-1 blockade.
GSE123813	2	su002	10x Genomics	BCC	PD-L1	698	Middle	cantharidin，camptothecin，mepyramine	31359002	Clonal replacement of tumor-specific T cells following PD-1 blockade.
GSE123813	3	su004	10x Genomics	BCC	PD-L1	5194	High	mono-immunotherapy	31359002	Clonal replacement of tumor-specific T cells following PD-1 blockade.
GSE123813	4	su005	10x Genomics	BCC	PD-L1	2479	Low	Vincristine + QL-VIII-58，Dactinomycin + QL-VIII-58，Dactinomycin + Vincristine	31359002	Clonal replacement of tumor-specific T cells following PD-1 blockade.
GSE123813	5	su006	10x Genomics	BCC	PD-L1	4958	Low	Sepantronium bromide + Daporinad，Sepantronium bromide + Vincristine，Daporinad + Vincristine	31359002	Clonal replacement of tumor-specific T cells following PD-1 blockade.
GSE123813	6	su008	10x Genomics	BCC	PD-L1	1133	Middle	suloctidil，azacyclonol，sanguinarine	31359002	Clonal replacement of tumor-specific T cells following PD-1 blockade.
GSE143423	1	TNBC	Smart-seq2	BRCA	-	4375	Low	MG-132 + ZSTK474，GSK1070916 + ZSTK474，TGX221 + ZSTK474	bioRxiv	Single-Cell Map of Diverse Immune Phenotypes in the Metastatic Brain Tumor Microenvironment of Non Small Cell Lung Cancer
GSE176078	1	CID44971	10x Genomics	BRCA	-	8061	Low	Sabutoclax + Dactolisib,Sabutoclax + Dactolisib,Sabutoclax + Dactolisib	34493872	A single-cell and spatially resolved atlas of human breast cancers
GSE125449	1	C26	10x Genomics	CHOL	PD-L1/CTLA-4	299	Low	Obatoclax Mesylate + Sepantronium bromide,Mitomycin-C + Sepantronium bromide,Dacinostat + Sepantronium bromide	31588021	Tumor Cell Biodiversity Drives Microenvironmental Reprogramming in Liver Cancer.
GSE125449	2	C29	10x Genomics	CHOL	PD-L1/CTLA-4	938	High	mono-immunotherapy	31588021	Tumor Cell Biodiversity Drives Microenvironmental Reprogramming in Liver Cancer.
GSE125449	3	C39	10x Genomics	CHOL	PD-1	445	Middle	0297417-0002B,alclometasone,Y-27632	31588021	Tumor Cell Biodiversity Drives Microenvironmental Reprogramming in Liver Cancer.
GSE125449	4	C46	10x Genomics	CHOL	PD-1	445	Low	AZD6738 + Tenovin-6,Epothilone B + Tenovin-6,BMS-754807 + Tenovin-6	31588021	Tumor Cell Biodiversity Drives Microenvironmental Reprogramming in Liver Cancer.
GSE138709	1	P4	10x Genomics	CHOL	-	5909	Low	Dinaciclib + Vincristine，Sepantronium bromide + Vincristine，Sepantronium bromide + Dinaciclib+H19	32505533	Single-cell transcriptomic architecture and intercellular crosstalk of human intrahepatic cholangiocarcinoma
GSE138709	2	P1	10x Genomics	CHOL	-	15280	Middle	ribostamycin,canrenoic acid,cefotetan	32505533	Single-cell transcriptomic architecture and intercellular crosstalk of human intrahepatic cholangiocarcinoma
GSE138709	3	P2	10x Genomics	CHOL	-	2714	Middle	lanatoside C, anisomycin, puromycin	32505533	Single-cell transcriptomic architecture and intercellular crosstalk of human intrahepatic cholangiocarcinoma
GSE138709	4	P5	10x Genomics	CHOL	-	2159	Middle	celastrol,azacitidine,calmidazolium,calmidazolium	32505533	Single-cell transcriptomic architecture and intercellular crosstalk of human intrahepatic cholangiocarcinoma
GSE138709	5	P3	10x Genomics	CHOL	-	7928	High	mono-immunotherapy	32505533	Single-cell transcriptomic architecture and intercellular crosstalk of human intrahepatic cholangiocarcinoma
GSE139555	1	Colon2	10x Genomics	CRC	-	3557	Middle	puromycin,azacyclonol,drofenine	32103181	Peripheral T cell expansion predicts tumour infiltration and clinical response.
GSE146771	1	P0309	Smart-seq2	CRC	-	1187	Middle	phenoxybenzamine,celastrol,securinine	32302573	Single-Cell Analyses Inform Mechanisms of Myeloid-Targeted Therapies in Colon Cancer.
GSE146771	2	P0305	Smart-seq2	CRC	-	267	High	mono-immunotherapy	32302573	Single-Cell Analyses Inform Mechanisms of Myeloid-Targeted Therapies in Colon Cancer.
GSE146771	3	P0410	10x Genomics	CRC	-	1369	Middle	cantharidin,MG-132,5255229	32302573	Single-Cell Analyses Inform Mechanisms of Myeloid-Targeted Therapies in Colon Cancer.
GSE146771	4	P0123	10x Genomics	CRC	-	495	High	mono-immunotherapy	32302573	Single-Cell Analyses Inform Mechanisms of Myeloid-Targeted Therapies in Colon Cancer.
GSE146771	5	P0408	10x Genomics	CRC	-	786	Middle	mesalazine，daunorubicin，ipratropium bromide	32302573	Single-Cell Analyses Inform Mechanisms of Myeloid-Targeted Therapies in Colon Cancer.
GSE146771	6	P0613	10x Genomics	CRC	-	2145	Middle	celastrol，lomustine，phenoxybenzamine	32302573	Single-Cell Analyses Inform Mechanisms of Myeloid-Targeted Therapies in Colon Cancer.
GSE103322	1	HN26	Smart-seq2	HNSC	-	214	Low	"Dactinomycin + GSK1059615"，"QL-VIII-58 + GSK1059615"，"ZSTK474 + GSK1059615"	29198524	Single-Cell Transcriptomic Analysis of Primary and Metastatic Tumor Ecosystems in Head and Neck Cancer.
GSE103322	2	HNSCC26	Smart-seq2	HNSC	-	214	Low	"Sepantronium bromide + Torin 2"，"Apitolisib + Torin 2"，"Obatoclax Mesylate + Torin 2"	29198524	Single-Cell Transcriptomic Analysis of Primary and Metastatic Tumor Ecosystems in Head and Neck Cancer.
GSE103322	3	HNSCC25	Smart-seq2	HNSC	-	501	High	mono-immunotherapy	29198524	Single-Cell Transcriptomic Analysis of Primary and Metastatic Tumor Ecosystems in Head and Neck Cancer.
GSE103322	4	HNSCC22	Smart-seq2	HNSC	-	201	Low	Torin 2 + THZ-2-102-1，Torin 2 + THZ-2-102-1，Torin 2 + THZ-2-102-1	29198524	Single-Cell Transcriptomic Analysis of Primary and Metastatic Tumor Ecosystems in Head and Neck Cancer.
GSE103322	5	HNSCC17	Smart-seq2	HNSC	-	490	High	mono-immunotherapy	29198524	Single-Cell Transcriptomic Analysis of Primary and Metastatic Tumor Ecosystems in Head and Neck Cancer.
GSE103322	6	HNSCC18	Smart-seq2	HNSC	-	567	Middle	cytisine,fluvastatin,succinylsulfathiazole	29198524	Single-Cell Transcriptomic Analysis of Primary and Metastatic Tumor Ecosystems in Head and Neck Cancer.
GSE103322	7	HNSCC9	Smart-seq2	HNSC	-	282	Middle	pimozide，albendazole，cinchocaine	29198524	Single-Cell Transcriptomic Analysis of Primary and Metastatic Tumor Ecosystems in Head and Neck Cancer.
GSE103322	8	HNSCC12	Smart-seq2	HNSC	-	157	Middle	cefapirin，cinchocaine，albendazole	29198524	Single-Cell Transcriptomic Analysis of Primary and Metastatic Tumor Ecosystems in Head and Neck Cancer.
GSE103322	9	HNSCC5	Smart-seq2	HNSC	-	370	Low	Apitolisib + Thapsigargin,Panobinostat + Thapsigargin,Panobinostat + Apitolisib	29198524	Single-Cell Transcriptomic Analysis of Primary and Metastatic Tumor Ecosystems in Head and Neck Cancer.
GSE103322	10	HNSCC6	Smart-seq2	HNSC	-	308	Low	HG-5-113-01 + PF-00299804，Amuvatinib + PF-00299804，Amuvatinib + HG-5-113-01	29198524	Single-Cell Transcriptomic Analysis of Primary and Metastatic Tumor Ecosystems in Head and Neck Cancer.
GSE103322	11	HNSCC20	Smart-seq2	HNSC	-	370	Low	ZSTK474 + QL-VIII-58，ZSTK474 + Sepantronium bromide，Belinostat + Sepantronium bromide	29198524	Single-Cell Transcriptomic Analysis of Primary and Metastatic Tumor Ecosystems in Head and Neck Cancer.
GSE121636	1	P3	10x Genomics	KIRC	-	5169	Middle	H-89, nadolol,dienestrol	33504936	Mapping the immune environment in clear cell renal carcinoma by single-cell genomics
GSE139555	2	Renal3	10x Genomics	LIHC	-	15748	Middle	drofenine,loxapine,metixene	32103181	Peripheral T cell expansion predicts tumour infiltration and clinical response.
GSE140228	5	T8	10x Genomics	LIHC	-	597	Low	Belinostat + IMD-0354,DMOG + IMD-0354,DMOG + Belinostat	31675496	Landscape and Dynamics of Single Immune Cells in Hepatocellular Carcinoma
GSE117570	1	P3	10x Genomics	NSCLC	-	994	Low	Shikonin + Sepantronium bromide，Gemcitabine + Sepantronium bromide，Dacinostat + Sepantronium bromide	31033233	Dissecting intratumoral myeloid cell plasticity by single cell RNA-seq.
GSE117570	2	P2	10x Genomics	NSCLC	-	2706	Low	Dactinomycin + THZ-2-102-1，(5Z)-7-Oxozeaenol + THZ-2-102-1，Sepantronium bromide + Dactinomycin	31033233	Dissecting intratumoral myeloid cell plasticity by single cell RNA-seq.
GSE117570	3	P1	10x Genomics	NSCLC	-	4314	Middle	W-13，alsterpaullone，mitoxantrone	31033233	Dissecting intratumoral myeloid cell plasticity by single cell RNA-seq.
GSE117570	4	P4	10x Genomics	NSCLC	-	3439	High	mono-immunotherapy	31033233	Dissecting intratumoral myeloid cell plasticity by single cell RNA-seq.
GSE127465	1	p1	10x Genomics	NSCLC	-	9508	Low	Mitomycin-C + Thapsigargin，AZD5363 + Thapsigargin，BDP-00009066 + Thapsigargin	30979687	Single-Cell Transcriptomics of Human and Mouse Lung Cancers Reveals Conserved Myeloid Populations across Individuals and Species.
GSE127465	2	p4	10x Genomics	NSCLC	-	3200	Low	Gemcitabine + Sepantronium bromide，Torin 2 + Gemcitabine，Panobinostat + Sepantronium bromide	30979687	Single-Cell Transcriptomics of Human and Mouse Lung Cancers Reveals Conserved Myeloid Populations across Individuals and Species.
GSE127465	3	p6	10x Genomics	NSCLC	-	3324	Middle	cefapirin，R-atenolol，sulfadiazine	30979687	Single-Cell Transcriptomics of Human and Mouse Lung Cancers Reveals Conserved Myeloid Populations across Individuals and Species.
GSE127465	4	p3	10x Genomics	NSCLC	-	7164	High	mono-immunotherapy	30979687	Single-Cell Transcriptomics of Human and Mouse Lung Cancers Reveals Conserved Myeloid Populations across Individuals and Species.
GSE127465	5	p7	10x Genomics	NSCLC	-	3737	Low	IMD-0354 + QL-VIII-58，Sepantronium bromide + QL-VIII-58，Sepantronium bromide + IMD-0354	30979687	Single-Cell Transcriptomics of Human and Mouse Lung Cancers Reveals Conserved Myeloid Populations across Individuals and Species.
GSE139555	3	Lung1	10x Genomics	NSCLC	-	13494	Middle	mesalazine，fluorocurarine，AG-012559	32103181	Peripheral T cell expansion predicts tumour infiltration and clinical response.
GSE139555	4	Lung3	10x Genomics	NSCLC	-	15266	High	mono-immunotherapy	32103181	Peripheral T cell expansion predicts tumour infiltration and clinical response.
GSE139555	5	Lung4	10x Genomics	NSCLC	-	701	Middle	Trolox C,fipexide,sulfadiazine	32103181	Peripheral T cell expansion predicts tumour infiltration and clinical response.
GSE143423	2	lbm1	10x Genomics	NSCLC	-	4810	Low	Apitolisib + Torin 2，Apitolisib + Torin 2，Apitolisib + Torin 2	bioRxiv	Single-Cell Map of Diverse Immune Phenotypes in the Metastatic Brain Tumor Microenvironment of Non Small Cell Lung Cancer
GSE143423	3	lbm2	10x Genomics	NSCLC	-	1696	Low	15-delta prostaglandin J2，resveratrol，celastrol	bioRxiv	Single-Cell Map of Diverse Immune Phenotypes in the Metastatic Brain Tumor Microenvironment of Non Small Cell Lung Cancer
GSE143423	4	lbm3	10x Genomics	NSCLC	-	5887	Middle	thiostrepton，15-delta prostaglandin J2，5182598	bioRxiv	Single-Cell Map of Diverse Immune Phenotypes in the Metastatic Brain Tumor Microenvironment of Non Small Cell Lung Cancer
GSE150660	1	Patient_D	10x Genomics	NSCLC	-	1751	Low	Sepantronium bromide + NSC319726，Vincristine + NSC319726，Vincristine + Sepantronium bromide+H28	32675368	Cancer cells deploy lipocalin-2 to collect limiting iron in leptomeningeal metastasis
GSE150660	2	Patient_A	10x Genomics	NSCLC	-	3656	Middle	parbendazole，bufexamac, fluvastatin	32675368	Cancer cells deploy lipocalin-2 to collect limiting iron in leptomeningeal metastasis
GSE162454	1	Patient 4	10x Genomics	OS	-	4070	Middle	mono-immunotherapy	34367994	Single-Cell Transcriptomics Reveals the Complexity of the Tumor Microenvironment of Treatment-Naive Osteosarcoma
GSE162454	2	Patient 6	10x Genomics	OS	-	8543	Middle	MS-275，5109870，gossypol	34367994	Single-Cell Transcriptomics Reveals the Complexity of the Tumor Microenvironment of Treatment-Naive Osteosarcoma
GSE162454	3	Patient 2	10x Genomics	OS	-	7582	Middle	Dactolisib + QL-VIII-58,Tenovin-6 + QL-VIII-58,CPI-613 + QL-VIII-58	34367994	Single-Cell Transcriptomics Reveals the Complexity of the Tumor Microenvironment of Treatment-Naive Osteosarcoma
GSE162454	4	Patient 3	10x Genomics	OS	-	8986	High	mono-immunotherapy	34367994	Single-Cell Transcriptomics Reveals the Complexity of the Tumor Microenvironment of Treatment-Naive Osteosarcoma
CRA001160	1	T2	10x Genomics	PAAD	-	3040	High	mono-immunotherapy	31273297	Single-cell RNA-seq highlights intra-tumoral heterogeneity and malignant progression in pancreatic ductal adenocarcinoma.
CRA001160	2	T4	10x Genomics	PAAD	-	1027	Middle	MS-275，5109870，gossypol	31273297	Single-cell RNA-seq highlights intra-tumoral heterogeneity and malignant progression in pancreatic ductal adenocarcinoma.
CRA001160	3	T6	10x Genomics	PAAD	-	1871	Low	Dactolisib + QL-VIII-58,Tenovin-6 + QL-VIII-58,CPI-613 + QL-VIII-58	31273297	Single-cell RNA-seq highlights intra-tumoral heterogeneity and malignant progression in pancreatic ductal adenocarcinoma.
CRA001160	4	T7	10x Genomics	PAAD	-	747	Low	CUDC-101 + Sepantronium bromide,AR-42 + Sepantronium bromide,Elesclomol + Sepantronium bromide	31273297	Single-cell RNA-seq highlights intra-tumoral heterogeneity and malignant progression in pancreatic ductal adenocarcinoma.
CRA001160	5	T8	10x Genomics	PAAD	-	597	Low	Belinostat + IMD-0354,DMOG + IMD-0354,DMOG + Belinostat	31273297	Single-cell RNA-seq highlights intra-tumoral heterogeneity and malignant progression in pancreatic ductal adenocarcinoma.
CRA001160	6	T9	10x Genomics	PAAD	-	2354	Low	Torin 2 + Sepantronium bromide,Trametinib + Sepantronium bromide,Thapsigargin + Sepantronium bromide	31273297	Single-cell RNA-seq highlights intra-tumoral heterogeneity and malignant progression in pancreatic ductal adenocarcinoma.
CRA001160	7	T10	10x Genomics	PAAD	-	2354	High	mono-immunotherapy	31273297	Single-cell RNA-seq highlights intra-tumoral heterogeneity and malignant progression in pancreatic ductal adenocarcinoma.
CRA001160	8	T11	10x Genomics	PAAD	-	3141	Low	Torin 2 + Sepantronium bromide"，Thapsigargin + Sepantronium bromide"，Obatoclax Mesylate + Sepantronium bromide	31273297	Single-cell RNA-seq highlights intra-tumoral heterogeneity and malignant progression in pancreatic ductal adenocarcinoma.
CRA001160	9	T12	10x Genomics	PAAD	-	2269	Middle	5109870，pararosaniline，gossypol	31273297	Single-cell RNA-seq highlights intra-tumoral heterogeneity and malignant progression in pancreatic ductal adenocarcinoma.
CRA001160	10	T13	10x Genomics	PAAD	-	2058	Low	Torin 2 + Sepantronium bromide，Trametinib + Sepantronium bromide，Thapsigargin + Sepantronium bromide	31273297	Single-cell RNA-seq highlights intra-tumoral heterogeneity and malignant progression in pancreatic ductal adenocarcinoma.
CRA001160	11	T15	10x Genomics	PAAD	-	1956	Middle	ivermectin,emetine,5109870	31273297	Single-cell RNA-seq highlights intra-tumoral heterogeneity and malignant progression in pancreatic ductal adenocarcinoma.
CRA001160	12	T16	10x Genomics	PAAD	-	1634	Low	Daporinad + Sepantronium bromide，Thapsigargin + Sepantronium bromide，Obatoclax Mesylate + Sepantronium bromide	31273297	Single-cell RNA-seq highlights intra-tumoral heterogeneity and malignant progression in pancreatic ductal adenocarcinoma.
CRA001160	13	T17	10x Genomics	PAAD	-	2085	Low	Thapsigargin + Sepantronium bromide,Trametinib + Sepantronium bromide,Trametinib + Thapsigargin	31273297	Single-cell RNA-seq highlights intra-tumoral heterogeneity and malignant progression in pancreatic ductal adenocarcinoma.
CRA001160	14	T19	10x Genomics	PAAD	-	2927	Low	Flavopiridol + Dactolisib,Tanespimycin + Dactolisib,Amuvatinib + Dactolisib	31273297	Single-cell RNA-seq highlights intra-tumoral heterogeneity and malignant progression in pancreatic ductal adenocarcinoma.
CRA001160	15	T21	10x Genomics	PAAD	-	807	Low	Thapsigargin + Sepantronium bromide，Trametinib + Sepantronium bromide，Trametinib + Thapsigargin	31273297	Single-cell RNA-seq highlights intra-tumoral heterogeneity and malignant progression in pancreatic ductal adenocarcinoma.
CRA001160	16	T23	10x Genomics	PAAD	-	2865	Middle	emetine，PHA-00846566E，cicloheximide	31273297	Single-cell RNA-seq highlights intra-tumoral heterogeneity and malignant progression in pancreatic ductal adenocarcinoma.
CRA001160	17	T24	10x Genomics	PAAD	-	1811	Low	Torin 2 + Sepantronium bromide，Trametinib + Sepantronium bromide，Thapsigargin + Sepantronium bromide	31273297	Single-cell RNA-seq highlights intra-tumoral heterogeneity and malignant progression in pancreatic ductal adenocarcinoma.
CRA001160	18	T1	10x Genomics	PAAD	-	1171	High	mono-immunotherapy	31273297	Single-cell RNA-seq highlights intra-tumoral heterogeneity and malignant progression in pancreatic ductal adenocarcinoma.
CRA001160	19	T3	10x Genomics	PAAD	-	1316	Middle	cantharidin,celastrol,emetine	31273297	Single-cell RNA-seq highlights intra-tumoral heterogeneity and malignant progression in pancreatic ductal adenocarcinoma.
CRA001160	20	T18	10x Genomics	PAAD	-	1562	Low	Panobinostat + Trametinib，OSI-027 + Trametinib，Obatoclax Mesylate + Trametinib	31273297	Single-cell RNA-seq highlights intra-tumoral heterogeneity and malignant progression in pancreatic ductal adenocarcinoma.
CRA001160	21	T20	10x Genomics	PAAD	-	482	Low	Daporinad + Sepantronium bromide,Thapsigargin + Sepantronium bromide,Obatoclax Mesylate + Sepantronium bromide	31273297	Single-cell RNA-seq highlights intra-tumoral heterogeneity and malignant progression in pancreatic ductal adenocarcinoma.
CRA001160	22	T22	10x Genomics	PAAD	-	2215	Middle	4,5-dianilinophthalimide,exisulind,5109870	31273297	Single-cell RNA-seq highlights intra-tumoral heterogeneity and malignant progression in pancreatic ductal adenocarcinoma.
CRA001160	23	T14	10x Genomics	PAAD	-	1998	Low	Torin 2 + THZ-2-102-1,Sepantronium bromide + THZ-2-102-1,Mitomycin-C + THZ-2-102-1	31273297	Single-cell RNA-seq highlights intra-tumoral heterogeneity and malignant progression in pancreatic ductal adenocarcinoma.
GSE115978	1	Mel79	Smart-seq2	SKCM	PD-L1	894	Middle	15-delta prostaglandin J2，5109870，phenoxybenzamine	29198524	Single-Cell Transcriptomic Analysis of Primary and Metastatic Tumor Ecosystems in Head and Neck Cancer.
GSE115978	2	Mel72	Smart-seq2	SKCM	PD-L1	181	High	mono-immunotherapy	30388455	A Cancer Cell Program Promotes T Cell Exclusion and Resistance to Checkpoint Blockade.
GSE115978	3	Mel88	Smart-seq2	SKCM	PD-L1	352	Low	Torin 2 + Sepantronium bromide,Gemcitabine + Sepantronium bromide,Thapsigargin + Sepantronium bromide	30388455	A Cancer Cell Program Promotes T Cell Exclusion and Resistance to Checkpoint Blockade.
GSE115978	4	Mel81	Smart-seq2	SKCM	PD-L1	205	Low	Sepantronium bromide + QL-VIII-ZS,ZSTK474 + QL-VIII-58,Temsirolimus + QL-VIII-58	30388455	A Cancer Cell Program Promotes T Cell Exclusion and Resistance to Checkpoint Blockade.
GSE115978	5	Mel102	Smart-seq2	SKCM	PD-L1	322	Low	Thapsigargin + Obatoclax Mesylate，NSC319726 + Obatoclax Mesylate，NSC319726 + Thapsigargin	30388455	A Cancer Cell Program Promotes T Cell Exclusion and Resistance to Checkpoint Blockade.
GSE115978	6	Mel110	Smart-seq2	SKCM	PD-L1	322	Low	ARRY-520 + Sepantronium bromide,Apitolisib + Sepantronium bromide,Bleomycin (50 uM) + Sepantronium bromide	30388455	A Cancer Cell Program Promotes T Cell Exclusion and Resistance to Checkpoint Blockade.
GSE118056	1	patient1	10x Genomics	SKCM	PD-L1	11024	Low	QL-VIII-58 + Selisistat，Torin 2 + Selisistat，Thapsigargin + Selisistat	30250229	Acquired cancer resistance to combination immunotherapy from transcriptional loss of class I HLA.
GSE72056	1	Patient76	Smart-seq2	SKCM	-	181	High	mono-immunotherapy	27124452	Dissecting the multicellular ecosystem of metastatic melanoma by single-cell RNA-seq.
GSE72056	2	Patient80	Smart-seq2	SKCM	-	480	Low	Dactolisib + THZ-2-102-1，QL-VIII-58 + THZ-2-102-1，JW-7-52-1 + THZ-2-102-1	31359002	Single-Cell Analyses Inform Mechanisms of Myeloid-Targeted Therapies in Colon Cancer.
GSE72056	3	Patient79	Smart-seq2	SKCM	-	896	Middle	oxaprozin,etamsylate,alclometasone	27124452	Dissecting the multicellular ecosystem of metastatic melanoma by single-cell RNA-seq.
GSE72056	4	Patient58	Smart-seq2	SKCM	-	142	Middle	demecarium bromide,diethylcarbamazine,albendazole	27124452	Dissecting the multicellular ecosystem of metastatic melanoma by single-cell RNA-seq.
GSE72056	5	Patient78	Smart-seq2	SKCM	-	131	Low	Dactolisib + Dactinomycin,Dinaciclib + Dactinomycin,Dinaciclib + Dactolisib	27124452	Dissecting the multicellular ecosystem of metastatic melanoma by single-cell RNA-seq.
GSE72056	6	Patient88	Smart-seq2	SKCM	-	351	Low	Omipalisib + Sepantronium bromide,Obatoclax Mesylate + Sepantronium bromide,QL-VIII-58 + Sepantronium bromide	27124452	Dissecting the multicellular ecosystem of metastatic melanoma by single-cell RNA-seq.
GSE131309	1	Patient 3	Smart-seq2	SS	-	835	Low	Torin 2 + Sepantronium bromide，H29	33495604	Opposing immune and genetic mechanisms shape oncogenic programs in synovial sarcoma
GSE131309	2	Patient 11	Smart-seq2	SS	-	176	Low	Obatoclax Mesylate + Sepantronium bromid，Daporinad + Sepantronium bromide，Vincristine + Sepantronium bromide	33495604	Opposing immune and genetic mechanisms shape oncogenic programs in synovial sarcoma
GSE131309	3	Patient 2	Smart-seq2	SS	-	1452	Middle	W-13, sulfadiazine, bicuculline	33495604	Opposing immune and genetic mechanisms shape oncogenic programs in synovial sarcoma
GSE131309	4	Patient 4	Smart-seq2	SS	-	435	Middle	celastrol,puromycin,prenylamine	33495604	Opposing immune and genetic mechanisms shape oncogenic programs in synovial sarcoma
GSE131309	5	Patient 1	Smart-seq2	SS	-	1719	High	mono-immunotherapy	33495604	Opposing immune and genetic mechanisms shape oncogenic programs in synovial sarcoma
GSE148673	1	ATC265T	10x Genomics	THCA	-	2178	Low	Obatoclax Mesylate + THZ-2-102-1，GSK1070916 + THZ-2-102-1，Sepantronium bromide + Obatoclax Mesylate	33462507	Delineating copy number and clonal substructure in human tumors from single-cell transcriptomes
GSE148673	2	ATC273T	10x Genomics	THCA	-	6215	Low	Sepantronium bromide + Thapsigargin，Thapsigargin + Torin 2，Sepantronium bromide + Torin 2	33462507	Delineating copy number and clonal substructure in human tumors from single-cell transcriptomes
GSE148673	3	ATC269T	10x Genomics	THCA	-	3257	Low	SNX-2112 + Omipalisib，GSK1070916 + Omipalisib，Torin 2 + Omipalisib	33462507	Delineating copy number and clonal substructure in human tumors from single-cell transcriptomes
GSE148673	4	ATC267T	10x Genomics	THCA	-	1725	Middle	parthenolide,securinine,cefapirin	33462507	Delineating copy number and clonal substructure in human tumors from single-cell transcriptomes
GSE148673	5	ATC275T	10x Genomics	THCA	-	6032	High	mono-immunotherapy	33462507	Delineating copy number and clonal substructure in human tumors from single-cell transcriptomes
GSE139555	6	Endo2	10x Genomics	UCEC	-	1512	Middle	alpha-estradiol,imatinib,Trolox C	32103181	Peripheral T cell expansion predicts tumour infiltration and clinical response.
GSE139555	7	Endo3	10x Genomics	UCEC	-	4903	Middle	tremorine,amoxicillin,etofylline	32103181	Peripheral T cell expansion predicts tumour infiltration and clinical response.
GSE139829	1	UMM069	10x Genomics	UVM	-	1464	Low	Torin 2 + Sepantronium bromide,Trametinib + Sepantronium bromide,Thapsigargin + Sepantronium bromide	31980621	Single-cell analysis reveals new evolutionary complexity in uveal melanoma
GSE139829	2	UMM063	10x Genomics	UVM	-	3651	Low	mono-immunotherapy	31980621	Single-cell analysis reveals new evolutionary complexity in uveal melanoma
GSE139829	3	UMM064	10x Genomics	UVM	-	8989	Low	Torin 2 + Sepantronium bromide"，Thapsigargin + Sepantronium bromide"，Obatoclax Mesylate + Sepantronium bromide	31980621	Single-cell analysis reveals new evolutionary complexity in uveal melanoma
GSE139829	4	UMM059	10x Genomics	UVM	-	3407	Middle	verteporfin,epivincamine,tolbutamide	31273297	Single-cell analysis reveals new evolutionary complexity in uveal melanoma
GSE139829	5	UMM061	10x Genomics	UVM	-	7879	Middle	Torin 2 + Sepantronium bromide，Trametinib + Sepantronium bromide，Thapsigargin + Sepantronium bromide	31273297	Single-cell analysis reveals new evolutionary complexity in uveal melanoma
GSE139829	6	UMM065	10x Genomics	UVM	-	8147	Middle	ivermectin,emetine,5109870	31273297	Single-cell analysis reveals new evolutionary complexity in uveal melanoma
GSE139829	7	UMM062	10x Genomics	UVM	-	11468	High	Daporinad + Sepantronium bromide，Thapsigargin + Sepantronium bromide，Obatoclax Mesylate + Sepantronium bromide	31273297	Single-cell analysis reveals new evolutionary complexity in uveal melanoma

## Sheet: Table S3
Table S3. Details of drugs from GDSC database used in comboSC.
Drugs	Database	URLs
Erlotinib	GDSC	https://pubchem.ncbi.nlm.nih.gov/compound/Erlotinib
Rapamycin	GDSC	https://pubchem.ncbi.nlm.nih.gov/compound/Rapamycin
Sunitinib	GDSC	https://pubchem.ncbi.nlm.nih.gov/compound/Sunitinib
PHA-665752	GDSC	https://pubchem.ncbi.nlm.nih.gov/compound/PHA-665752
MG-132	GDSC	https://pubchem.ncbi.nlm.nih.gov/compound/MG-132
Paclitaxel	GDSC	https://pubchem.ncbi.nlm.nih.gov/compound/Paclitaxel
Cyclopamine	GDSC	https://pubchem.ncbi.nlm.nih.gov/compound/Cyclopamine
AZ628	GDSC	https://pubchem.ncbi.nlm.nih.gov/compound/AZ628
Sorafenib	GDSC	https://pubchem.ncbi.nlm.nih.gov/compound/Sorafenib
Tozasertib	GDSC	https://pubchem.ncbi.nlm.nih.gov/compound/Tozasertib
Imatinib	GDSC	https://pubchem.ncbi.nlm.nih.gov/compound/Imatinib
NVP-TAE684	GDSC	https://pubchem.ncbi.nlm.nih.gov/compound/NVP-TAE684
Crizotinib	GDSC	https://pubchem.ncbi.nlm.nih.gov/compound/Crizotinib
Saracatinib	GDSC	https://pubchem.ncbi.nlm.nih.gov/compound/Saracatinib
S-Trityl-L-cysteine	GDSC	https://pubchem.ncbi.nlm.nih.gov/compound/S-Trityl-L-cysteine
Z-LLNle-CHO	GDSC	https://pubchem.ncbi.nlm.nih.gov/compound/Z-LLNle-CHO
Dasatinib	GDSC	https://pubchem.ncbi.nlm.nih.gov/compound/Dasatinib
GNF-2	GDSC	https://pubchem.ncbi.nlm.nih.gov/compound/GNF-2
CGP-60474	GDSC	https://pubchem.ncbi.nlm.nih.gov/compound/CGP-60474
CGP-082996	GDSC	https://pubchem.ncbi.nlm.nih.gov/compound/CGP-082996
A-770041	GDSC	https://pubchem.ncbi.nlm.nih.gov/compound/A-770041
WH-4-023	GDSC	https://pubchem.ncbi.nlm.nih.gov/compound/WH-4-023
WZ-1-84	GDSC	https://pubchem.ncbi.nlm.nih.gov/compound/WZ-1-84
BI-2536	GDSC	https://pubchem.ncbi.nlm.nih.gov/compound/BI-2536
BMS-536924	GDSC	https://pubchem.ncbi.nlm.nih.gov/compound/BMS-536924
BMS-509744	GDSC	https://pubchem.ncbi.nlm.nih.gov/compound/BMS-509744
CMK	GDSC	https://pubchem.ncbi.nlm.nih.gov/compound/CMK
Pyrimethamine	GDSC	https://pubchem.ncbi.nlm.nih.gov/compound/Pyrimethamine
JW-7-52-1	GDSC	https://pubchem.ncbi.nlm.nih.gov/compound/JW-7-52-1
A-443654	GDSC	https://pubchem.ncbi.nlm.nih.gov/compound/A-443654
GW843682X	GDSC	https://pubchem.ncbi.nlm.nih.gov/compound/GW843682X
Entinostat	GDSC	https://pubchem.ncbi.nlm.nih.gov/compound/Entinostat
Parthenolide	GDSC	https://pubchem.ncbi.nlm.nih.gov/compound/Parthenolide
GSK319347A	GDSC	https://pubchem.ncbi.nlm.nih.gov/compound/GSK319347A
TGX221	GDSC	https://pubchem.ncbi.nlm.nih.gov/compound/TGX221
Bortezomib	GDSC	https://pubchem.ncbi.nlm.nih.gov/compound/Bortezomib
XMD8-85	GDSC	https://pubchem.ncbi.nlm.nih.gov/compound/XMD8-85
Seliciclib	GDSC	https://pubchem.ncbi.nlm.nih.gov/compound/Seliciclib
Salubrinal	GDSC	https://pubchem.ncbi.nlm.nih.gov/compound/Salubrinal
Lapatinib	GDSC	https://pubchem.ncbi.nlm.nih.gov/compound/Lapatinib
GSK269962A	GDSC	https://pubchem.ncbi.nlm.nih.gov/compound/GSK269962A
Doxorubicin	GDSC	https://pubchem.ncbi.nlm.nih.gov/compound/Doxorubicin
Etoposide	GDSC	https://pubchem.ncbi.nlm.nih.gov/compound/Etoposide
Gemcitabine	GDSC	https://pubchem.ncbi.nlm.nih.gov/compound/Gemcitabine
Mitomycin-C	GDSC	https://pubchem.ncbi.nlm.nih.gov/compound/Mitomycin-C
Vinorelbine	GDSC	https://pubchem.ncbi.nlm.nih.gov/compound/Vinorelbine
NSC-87877	GDSC	https://pubchem.ncbi.nlm.nih.gov/compound/NSC-87877
Bicalutamide	GDSC	https://pubchem.ncbi.nlm.nih.gov/compound/Bicalutamide
QS11	GDSC	https://pubchem.ncbi.nlm.nih.gov/compound/QS11
CP466722	GDSC	https://pubchem.ncbi.nlm.nih.gov/compound/CP466722
Midostaurin	GDSC	https://pubchem.ncbi.nlm.nih.gov/compound/Midostaurin
CHIR-99021	GDSC	https://pubchem.ncbi.nlm.nih.gov/compound/CHIR-99021
Ponatinib	GDSC	https://pubchem.ncbi.nlm.nih.gov/compound/Ponatinib
AZD6482	GDSC	https://pubchem.ncbi.nlm.nih.gov/compound/AZD6482
JNK-9L	GDSC	https://pubchem.ncbi.nlm.nih.gov/compound/JNK-9L
PF-562271	GDSC	https://pubchem.ncbi.nlm.nih.gov/compound/PF-562271
HG6-64-1	GDSC	https://pubchem.ncbi.nlm.nih.gov/compound/HG6-64-1
JQ1	GDSC	https://pubchem.ncbi.nlm.nih.gov/compound/JQ1
JQ12	GDSC	https://pubchem.ncbi.nlm.nih.gov/compound/JQ12
DMOG	GDSC	https://pubchem.ncbi.nlm.nih.gov/compound/DMOG
FTI-277	GDSC	https://pubchem.ncbi.nlm.nih.gov/compound/FTI-277
OSU-03012	GDSC	https://pubchem.ncbi.nlm.nih.gov/compound/OSU-03012
Shikonin	GDSC	https://pubchem.ncbi.nlm.nih.gov/compound/Shikonin
AKT inhibitor VIII	GDSC	https://pubchem.ncbi.nlm.nih.gov/compound/AKT inhibitor VIII
Embelin	GDSC	https://pubchem.ncbi.nlm.nih.gov/compound/Embelin
FH535	GDSC	https://pubchem.ncbi.nlm.nih.gov/compound/FH535
PAC-1	GDSC	https://pubchem.ncbi.nlm.nih.gov/compound/PAC-1
IPA-3	GDSC	https://pubchem.ncbi.nlm.nih.gov/compound/IPA-3
GSK650394	GDSC	https://pubchem.ncbi.nlm.nih.gov/compound/GSK650394
BAY-61-3606	GDSC	https://pubchem.ncbi.nlm.nih.gov/compound/BAY-61-3606
5-Fluorouracil	GDSC	https://pubchem.ncbi.nlm.nih.gov/compound/5-Fluorouracil
Thapsigargin	GDSC	https://pubchem.ncbi.nlm.nih.gov/compound/Thapsigargin
Obatoclax Mesylate	GDSC	https://pubchem.ncbi.nlm.nih.gov/compound/Obatoclax Mesylate
BMS-754807	GDSC	https://pubchem.ncbi.nlm.nih.gov/compound/BMS-754807
Linsitinib	GDSC	https://pubchem.ncbi.nlm.nih.gov/compound/Linsitinib
Bexarotene	GDSC	https://pubchem.ncbi.nlm.nih.gov/compound/Bexarotene
Bleomycin	GDSC	https://pubchem.ncbi.nlm.nih.gov/compound/Bleomycin
LFM-A13	GDSC	https://pubchem.ncbi.nlm.nih.gov/compound/LFM-A13
GW-2580	GDSC	https://pubchem.ncbi.nlm.nih.gov/compound/GW-2580
Luminespib	GDSC	https://pubchem.ncbi.nlm.nih.gov/compound/Luminespib
Phenformin	GDSC	https://pubchem.ncbi.nlm.nih.gov/compound/Phenformin
Bryostatin 1	GDSC	https://pubchem.ncbi.nlm.nih.gov/compound/Bryostatin 1
Pazopanib	GDSC	https://pubchem.ncbi.nlm.nih.gov/compound/Pazopanib
Dacinostat	GDSC	https://pubchem.ncbi.nlm.nih.gov/compound/Dacinostat
Epothilone B	GDSC	https://pubchem.ncbi.nlm.nih.gov/compound/Epothilone B
GSK1904529A	GDSC	https://pubchem.ncbi.nlm.nih.gov/compound/GSK1904529A
BMS-345541	GDSC	https://pubchem.ncbi.nlm.nih.gov/compound/BMS-345541
Tipifarnib	GDSC	https://pubchem.ncbi.nlm.nih.gov/compound/Tipifarnib
Avagacestat	GDSC	https://pubchem.ncbi.nlm.nih.gov/compound/Avagacestat
Ruxolitinib	GDSC	https://pubchem.ncbi.nlm.nih.gov/compound/Ruxolitinib
AS601245	GDSC	https://pubchem.ncbi.nlm.nih.gov/compound/AS601245
Ispinesib Mesylate	GDSC	https://pubchem.ncbi.nlm.nih.gov/compound/Ispinesib Mesylate
TL-2-105	GDSC	https://pubchem.ncbi.nlm.nih.gov/compound/TL-2-105
AT-7519	GDSC	https://pubchem.ncbi.nlm.nih.gov/compound/AT-7519
TAK-715	GDSC	https://pubchem.ncbi.nlm.nih.gov/compound/TAK-715
BX-912	GDSC	https://pubchem.ncbi.nlm.nih.gov/compound/BX-912
ZSTK474	GDSC	https://pubchem.ncbi.nlm.nih.gov/compound/ZSTK474
AS605240	GDSC	https://pubchem.ncbi.nlm.nih.gov/compound/AS605240
Genentech Cpd 10	GDSC	https://pubchem.ncbi.nlm.nih.gov/compound/Genentech Cpd 10
GSK1070916	GDSC	https://pubchem.ncbi.nlm.nih.gov/compound/GSK1070916
Enzastaurin	GDSC	https://pubchem.ncbi.nlm.nih.gov/compound/Enzastaurin
GSK429286A	GDSC	https://pubchem.ncbi.nlm.nih.gov/compound/GSK429286A
FMK	GDSC	https://pubchem.ncbi.nlm.nih.gov/compound/FMK
QL-XII-47	GDSC	https://pubchem.ncbi.nlm.nih.gov/compound/QL-XII-47
IC-87114	GDSC	https://pubchem.ncbi.nlm.nih.gov/compound/IC-87114
Idelalisib	GDSC	https://pubchem.ncbi.nlm.nih.gov/compound/Idelalisib
UNC0638	GDSC	https://pubchem.ncbi.nlm.nih.gov/compound/UNC0638
Cabozantinib	GDSC	https://pubchem.ncbi.nlm.nih.gov/compound/Cabozantinib
WZ3105	GDSC	https://pubchem.ncbi.nlm.nih.gov/compound/WZ3105
XMD14-99	GDSC	https://pubchem.ncbi.nlm.nih.gov/compound/XMD14-99
Quizartinib	GDSC	https://pubchem.ncbi.nlm.nih.gov/compound/Quizartinib
CP724714	GDSC	https://pubchem.ncbi.nlm.nih.gov/compound/CP724714
JW-7-24-1	GDSC	https://pubchem.ncbi.nlm.nih.gov/compound/JW-7-24-1
NPK76-II-72-1	GDSC	https://pubchem.ncbi.nlm.nih.gov/compound/NPK76-II-72-1
STF-62247	GDSC	https://pubchem.ncbi.nlm.nih.gov/compound/STF-62247
NG-25	GDSC	https://pubchem.ncbi.nlm.nih.gov/compound/NG-25
TL-1-85	GDSC	https://pubchem.ncbi.nlm.nih.gov/compound/TL-1-85
VX-11e	GDSC	https://pubchem.ncbi.nlm.nih.gov/compound/VX-11e
FR-180204	GDSC	https://pubchem.ncbi.nlm.nih.gov/compound/FR-180204
ACY-1215	GDSC	https://pubchem.ncbi.nlm.nih.gov/compound/ACY-1215
Tubastatin A	GDSC	https://pubchem.ncbi.nlm.nih.gov/compound/Tubastatin A
Zibotentan	GDSC	https://pubchem.ncbi.nlm.nih.gov/compound/Zibotentan
Sepantronium bromide	GDSC	https://pubchem.ncbi.nlm.nih.gov/compound/Sepantronium bromide
NSC-207895	GDSC	https://pubchem.ncbi.nlm.nih.gov/compound/NSC-207895
VNLG/124	GDSC	https://pubchem.ncbi.nlm.nih.gov/compound/VNLG/124
AR-42	GDSC	https://pubchem.ncbi.nlm.nih.gov/compound/AR-42
CUDC-101	GDSC	https://pubchem.ncbi.nlm.nih.gov/compound/CUDC-101
Belinostat	GDSC	https://pubchem.ncbi.nlm.nih.gov/compound/Belinostat
I-BET-762	GDSC	https://pubchem.ncbi.nlm.nih.gov/compound/I-BET-762
CAY10603	GDSC	https://pubchem.ncbi.nlm.nih.gov/compound/CAY10603
Linifanib	GDSC	https://pubchem.ncbi.nlm.nih.gov/compound/Linifanib
BIX02189	GDSC	https://pubchem.ncbi.nlm.nih.gov/compound/BIX02189
Alectinib	GDSC	https://pubchem.ncbi.nlm.nih.gov/compound/Alectinib
Pelitinib	GDSC	https://pubchem.ncbi.nlm.nih.gov/compound/Pelitinib
Omipalisib	GDSC	https://pubchem.ncbi.nlm.nih.gov/compound/Omipalisib
JNJ38877605	GDSC	https://pubchem.ncbi.nlm.nih.gov/compound/JNJ38877605
SU11274	GDSC	https://pubchem.ncbi.nlm.nih.gov/compound/SU11274
KIN001-236	GDSC	https://pubchem.ncbi.nlm.nih.gov/compound/KIN001-236
KIN001-244	GDSC	https://pubchem.ncbi.nlm.nih.gov/compound/KIN001-244
WHI-P97	GDSC	https://pubchem.ncbi.nlm.nih.gov/compound/WHI-P97
KIN001-042	GDSC	https://pubchem.ncbi.nlm.nih.gov/compound/KIN001-042
KIN001-260	GDSC	https://pubchem.ncbi.nlm.nih.gov/compound/KIN001-260
KIN001-266	GDSC	https://pubchem.ncbi.nlm.nih.gov/compound/KIN001-266
Masitinib	GDSC	https://pubchem.ncbi.nlm.nih.gov/compound/Masitinib
Amuvatinib	GDSC	https://pubchem.ncbi.nlm.nih.gov/compound/Amuvatinib
MPS-1-IN-1	GDSC	https://pubchem.ncbi.nlm.nih.gov/compound/MPS-1-IN-1
NVP-BHG712	GDSC	https://pubchem.ncbi.nlm.nih.gov/compound/NVP-BHG712
OSI-930	GDSC	https://pubchem.ncbi.nlm.nih.gov/compound/OSI-930
OSI-027	GDSC	https://pubchem.ncbi.nlm.nih.gov/compound/OSI-027
CX-5461	GDSC	https://pubchem.ncbi.nlm.nih.gov/compound/CX-5461
PHA-793887	GDSC	https://pubchem.ncbi.nlm.nih.gov/compound/PHA-793887
PI-103	GDSC	https://pubchem.ncbi.nlm.nih.gov/compound/PI-103
PIK-93	GDSC	https://pubchem.ncbi.nlm.nih.gov/compound/PIK-93
SB52334	GDSC	https://pubchem.ncbi.nlm.nih.gov/compound/SB52334
TPCA-1	GDSC	https://pubchem.ncbi.nlm.nih.gov/compound/TPCA-1
Fedratinib	GDSC	https://pubchem.ncbi.nlm.nih.gov/compound/Fedratinib
Foretinib	GDSC	https://pubchem.ncbi.nlm.nih.gov/compound/Foretinib
Y-39983	GDSC	https://pubchem.ncbi.nlm.nih.gov/compound/Y-39983
YM201636	GDSC	https://pubchem.ncbi.nlm.nih.gov/compound/YM201636
Tivozanib	GDSC	https://pubchem.ncbi.nlm.nih.gov/compound/Tivozanib
WYE-125132	GDSC	https://pubchem.ncbi.nlm.nih.gov/compound/WYE-125132
GSK690693	GDSC	https://pubchem.ncbi.nlm.nih.gov/compound/GSK690693
SNX-2112	GDSC	https://pubchem.ncbi.nlm.nih.gov/compound/SNX-2112
QL-XI-92	GDSC	https://pubchem.ncbi.nlm.nih.gov/compound/QL-XI-92
XMD13-2	GDSC	https://pubchem.ncbi.nlm.nih.gov/compound/XMD13-2
QL-X-138	GDSC	https://pubchem.ncbi.nlm.nih.gov/compound/QL-X-138
XMD15-27	GDSC	https://pubchem.ncbi.nlm.nih.gov/compound/XMD15-27
T0901317	GDSC	https://pubchem.ncbi.nlm.nih.gov/compound/T0901317
Selisistat	GDSC	https://pubchem.ncbi.nlm.nih.gov/compound/Selisistat
Tenovin-6	GDSC	https://pubchem.ncbi.nlm.nih.gov/compound/Tenovin-6
THZ-2-49	GDSC	https://pubchem.ncbi.nlm.nih.gov/compound/THZ-2-49
KIN001-270	GDSC	https://pubchem.ncbi.nlm.nih.gov/compound/KIN001-270
THZ-2-102-1	GDSC	https://pubchem.ncbi.nlm.nih.gov/compound/THZ-2-102-1
AT7867	GDSC	https://pubchem.ncbi.nlm.nih.gov/compound/AT7867
CI-1033	GDSC	https://pubchem.ncbi.nlm.nih.gov/compound/CI-1033
PF-00299804	GDSC	https://pubchem.ncbi.nlm.nih.gov/compound/PF-00299804
TWS119	GDSC	https://pubchem.ncbi.nlm.nih.gov/compound/TWS119
Torin 2	GDSC	https://pubchem.ncbi.nlm.nih.gov/compound/Torin 2
Pilaralisib	GDSC	https://pubchem.ncbi.nlm.nih.gov/compound/Pilaralisib
GSK1059615	GDSC	https://pubchem.ncbi.nlm.nih.gov/compound/GSK1059615
Voxtalisib	GDSC	https://pubchem.ncbi.nlm.nih.gov/compound/Voxtalisib
Brivanib, BMS-540215	GDSC	https://pubchem.ncbi.nlm.nih.gov/compound/Brivanib, BMS-540215
BIBF-1120	GDSC	https://pubchem.ncbi.nlm.nih.gov/compound/BIBF-1120
AST-1306	GDSC	https://pubchem.ncbi.nlm.nih.gov/compound/AST-1306
Apitolisib	GDSC	https://pubchem.ncbi.nlm.nih.gov/compound/Apitolisib
LIMK1 inhibitor BMS4	GDSC	https://pubchem.ncbi.nlm.nih.gov/compound/LIMK1 inhibitor BMS4
kb NB 142-70	GDSC	https://pubchem.ncbi.nlm.nih.gov/compound/kb NB 142-70
Sphingosine Kinase 1 Inhibitor II	GDSC	https://pubchem.ncbi.nlm.nih.gov/compound/Sphingosine Kinase 1 Inhibitor II
eEF2K Inhibitor, A-484954	GDSC	https://pubchem.ncbi.nlm.nih.gov/compound/eEF2K Inhibitor, A-484954
MetAP2 Inhibitor, A832234	GDSC	https://pubchem.ncbi.nlm.nih.gov/compound/MetAP2 Inhibitor, A832234
Venotoclax	GDSC	https://pubchem.ncbi.nlm.nih.gov/compound/Venotoclax
CPI-613	GDSC	https://pubchem.ncbi.nlm.nih.gov/compound/CPI-613
CAY10566	GDSC	https://pubchem.ncbi.nlm.nih.gov/compound/CAY10566
Ara-G	GDSC	https://pubchem.ncbi.nlm.nih.gov/compound/Ara-G
Pemetrexed	GDSC	https://pubchem.ncbi.nlm.nih.gov/compound/Pemetrexed
Alisertib	GDSC	https://pubchem.ncbi.nlm.nih.gov/compound/Alisertib
Flavopiridol	GDSC	https://pubchem.ncbi.nlm.nih.gov/compound/Flavopiridol
C-75	GDSC	https://pubchem.ncbi.nlm.nih.gov/compound/C-75
CAP-232, TT-232, TLN-232	GDSC	https://pubchem.ncbi.nlm.nih.gov/compound/CAP-232, TT-232, TLN-232
Trichostatin A	GDSC	https://pubchem.ncbi.nlm.nih.gov/compound/Trichostatin A
Panobinostat	GDSC	https://pubchem.ncbi.nlm.nih.gov/compound/Panobinostat
LCL161	GDSC	https://pubchem.ncbi.nlm.nih.gov/compound/LCL161
IMD-0354	GDSC	https://pubchem.ncbi.nlm.nih.gov/compound/IMD-0354
MIM1	GDSC	https://pubchem.ncbi.nlm.nih.gov/compound/MIM1
ETP-45835	GDSC	https://pubchem.ncbi.nlm.nih.gov/compound/ETP-45835
CD532	GDSC	https://pubchem.ncbi.nlm.nih.gov/compound/CD532
NSC319726	GDSC	https://pubchem.ncbi.nlm.nih.gov/compound/NSC319726
ARRY-520	GDSC	https://pubchem.ncbi.nlm.nih.gov/compound/ARRY-520
SB505124	GDSC	https://pubchem.ncbi.nlm.nih.gov/compound/SB505124
A-83-01	GDSC	https://pubchem.ncbi.nlm.nih.gov/compound/A-83-01
LDN-193189	GDSC	https://pubchem.ncbi.nlm.nih.gov/compound/LDN-193189
FTY-720	GDSC	https://pubchem.ncbi.nlm.nih.gov/compound/FTY-720
BAM7	GDSC	https://pubchem.ncbi.nlm.nih.gov/compound/BAM7
AGI-6780	GDSC	https://pubchem.ncbi.nlm.nih.gov/compound/AGI-6780
Kobe2602	GDSC	https://pubchem.ncbi.nlm.nih.gov/compound/Kobe2602
LGK974	GDSC	https://pubchem.ncbi.nlm.nih.gov/compound/LGK974
Wnt-C59	GDSC	https://pubchem.ncbi.nlm.nih.gov/compound/Wnt-C59
RU-SKI 43	GDSC	https://pubchem.ncbi.nlm.nih.gov/compound/RU-SKI 43
AICA Ribonucleotide	GDSC	https://pubchem.ncbi.nlm.nih.gov/compound/AICA Ribonucleotide
Vinblastine	GDSC	https://pubchem.ncbi.nlm.nih.gov/compound/Vinblastine
Cisplatin	GDSC	https://pubchem.ncbi.nlm.nih.gov/compound/Cisplatin
Cytarabine	GDSC	https://pubchem.ncbi.nlm.nih.gov/compound/Cytarabine
Docetaxel	GDSC	https://pubchem.ncbi.nlm.nih.gov/compound/Docetaxel
Methotrexate	GDSC	https://pubchem.ncbi.nlm.nih.gov/compound/Methotrexate
Tretinoin	GDSC	https://pubchem.ncbi.nlm.nih.gov/compound/Tretinoin
Gefitinib	GDSC	https://pubchem.ncbi.nlm.nih.gov/compound/Gefitinib
Navitoclax	GDSC	https://pubchem.ncbi.nlm.nih.gov/compound/Navitoclax
Vorinostat	GDSC	https://pubchem.ncbi.nlm.nih.gov/compound/Vorinostat
Nilotinib	GDSC	https://pubchem.ncbi.nlm.nih.gov/compound/Nilotinib
Refametinib	GDSC	https://pubchem.ncbi.nlm.nih.gov/compound/Refametinib
CI-1040	GDSC	https://pubchem.ncbi.nlm.nih.gov/compound/CI-1040
Temsirolimus	GDSC	https://pubchem.ncbi.nlm.nih.gov/compound/Temsirolimus
Olaparib	GDSC	https://pubchem.ncbi.nlm.nih.gov/compound/Olaparib
Veliparib	GDSC	https://pubchem.ncbi.nlm.nih.gov/compound/Veliparib
Bosutinib	GDSC	https://pubchem.ncbi.nlm.nih.gov/compound/Bosutinib
Lenalidomide	GDSC	https://pubchem.ncbi.nlm.nih.gov/compound/Lenalidomide
Axitinib	GDSC	https://pubchem.ncbi.nlm.nih.gov/compound/Axitinib
AZD7762	GDSC	https://pubchem.ncbi.nlm.nih.gov/compound/AZD7762
GW441756	GDSC	https://pubchem.ncbi.nlm.nih.gov/compound/GW441756
Lestaurtinib	GDSC	https://pubchem.ncbi.nlm.nih.gov/compound/Lestaurtinib
SB216763	GDSC	https://pubchem.ncbi.nlm.nih.gov/compound/SB216763
Tanespimycin	GDSC	https://pubchem.ncbi.nlm.nih.gov/compound/Tanespimycin
VX-702	GDSC	https://pubchem.ncbi.nlm.nih.gov/compound/VX-702
Motesanib	GDSC	https://pubchem.ncbi.nlm.nih.gov/compound/Motesanib
KU-55933	GDSC	https://pubchem.ncbi.nlm.nih.gov/compound/KU-55933
Elesclomol	GDSC	https://pubchem.ncbi.nlm.nih.gov/compound/Elesclomol
Afatinib	GDSC	https://pubchem.ncbi.nlm.nih.gov/compound/Afatinib
Vismodegib	GDSC	https://pubchem.ncbi.nlm.nih.gov/compound/Vismodegib
PLX-4720	GDSC	https://pubchem.ncbi.nlm.nih.gov/compound/PLX-4720
BX795	GDSC	https://pubchem.ncbi.nlm.nih.gov/compound/BX795
NU7441	GDSC	https://pubchem.ncbi.nlm.nih.gov/compound/NU7441
SL0101	GDSC	https://pubchem.ncbi.nlm.nih.gov/compound/SL0101
Doramapimod	GDSC	https://pubchem.ncbi.nlm.nih.gov/compound/Doramapimod
JNK Inhibitor VIII	GDSC	https://pubchem.ncbi.nlm.nih.gov/compound/JNK Inhibitor VIII
Wee1 Inhibitor	GDSC	https://pubchem.ncbi.nlm.nih.gov/compound/Wee1 Inhibitor
Nutlin-3a (-)	GDSC	https://pubchem.ncbi.nlm.nih.gov/compound/Nutlin-3a (-)
Mirin	GDSC	https://pubchem.ncbi.nlm.nih.gov/compound/Mirin
PD173074	GDSC	https://pubchem.ncbi.nlm.nih.gov/compound/PD173074
ZM447439	GDSC	https://pubchem.ncbi.nlm.nih.gov/compound/ZM447439
RO-3306	GDSC	https://pubchem.ncbi.nlm.nih.gov/compound/RO-3306
MK-2206	GDSC	https://pubchem.ncbi.nlm.nih.gov/compound/MK-2206
Palbociclib	GDSC	https://pubchem.ncbi.nlm.nih.gov/compound/Palbociclib
Dactolisib	GDSC	https://pubchem.ncbi.nlm.nih.gov/compound/Dactolisib
Pictilisib	GDSC	https://pubchem.ncbi.nlm.nih.gov/compound/Pictilisib
AZD8055	GDSC	https://pubchem.ncbi.nlm.nih.gov/compound/AZD8055
PD0325901	GDSC	https://pubchem.ncbi.nlm.nih.gov/compound/PD0325901
SB590885	GDSC	https://pubchem.ncbi.nlm.nih.gov/compound/SB590885
Selumetinib	GDSC	https://pubchem.ncbi.nlm.nih.gov/compound/Selumetinib
CCT007093	GDSC	https://pubchem.ncbi.nlm.nih.gov/compound/CCT007093
EHT-1864	GDSC	https://pubchem.ncbi.nlm.nih.gov/compound/EHT-1864
Cetuximab	GDSC	https://pubchem.ncbi.nlm.nih.gov/compound/Cetuximab
PF-4708671	GDSC	https://pubchem.ncbi.nlm.nih.gov/compound/PF-4708671
Serdemetan	GDSC	https://pubchem.ncbi.nlm.nih.gov/compound/Serdemetan
HG-5-113-01	GDSC	https://pubchem.ncbi.nlm.nih.gov/compound/HG-5-113-01
HG-5-88-01	GDSC	https://pubchem.ncbi.nlm.nih.gov/compound/HG-5-88-01
TW 37	GDSC	https://pubchem.ncbi.nlm.nih.gov/compound/TW 37
XMD11-85h	GDSC	https://pubchem.ncbi.nlm.nih.gov/compound/XMD11-85h
ZG-10	GDSC	https://pubchem.ncbi.nlm.nih.gov/compound/ZG-10
XMD8-92	GDSC	https://pubchem.ncbi.nlm.nih.gov/compound/XMD8-92
QL-VIII-58	GDSC	https://pubchem.ncbi.nlm.nih.gov/compound/QL-VIII-58
CCT-018159	GDSC	https://pubchem.ncbi.nlm.nih.gov/compound/CCT-018159
Rucaparib	GDSC	https://pubchem.ncbi.nlm.nih.gov/compound/Rucaparib
Tamoxifen	GDSC	https://pubchem.ncbi.nlm.nih.gov/compound/Tamoxifen
QL-XII-61	GDSC	https://pubchem.ncbi.nlm.nih.gov/compound/QL-XII-61
PFI-1	GDSC	https://pubchem.ncbi.nlm.nih.gov/compound/PFI-1
IOX2	GDSC	https://pubchem.ncbi.nlm.nih.gov/compound/IOX2
YK-4-279	GDSC	https://pubchem.ncbi.nlm.nih.gov/compound/YK-4-279
(5Z)-7-Oxozeaenol	GDSC	https://pubchem.ncbi.nlm.nih.gov/compound/(5Z)-7-Oxozeaenol
Piperlongumine	GDSC	https://pubchem.ncbi.nlm.nih.gov/compound/Piperlongumine
Daporinad	GDSC	https://pubchem.ncbi.nlm.nih.gov/compound/Daporinad
Talazoparib	GDSC	https://pubchem.ncbi.nlm.nih.gov/compound/Talazoparib
rTRAIL	GDSC	https://pubchem.ncbi.nlm.nih.gov/compound/rTRAIL
UNC1215	GDSC	https://pubchem.ncbi.nlm.nih.gov/compound/UNC1215
UNC0642	GDSC	https://pubchem.ncbi.nlm.nih.gov/compound/UNC0642
SGC0946	GDSC	https://pubchem.ncbi.nlm.nih.gov/compound/SGC0946
ICL1100013	GDSC	https://pubchem.ncbi.nlm.nih.gov/compound/ICL1100013
XAV939	GDSC	https://pubchem.ncbi.nlm.nih.gov/compound/XAV939
Trametinib	GDSC	https://pubchem.ncbi.nlm.nih.gov/compound/Trametinib
Dabrafenib	GDSC	https://pubchem.ncbi.nlm.nih.gov/compound/Dabrafenib
Temozolomide	GDSC	https://pubchem.ncbi.nlm.nih.gov/compound/Temozolomide
Bleomycin (50 uM)	GDSC	https://pubchem.ncbi.nlm.nih.gov/compound/Bleomycin (50 uM)
SN-38	GDSC	https://pubchem.ncbi.nlm.nih.gov/compound/SN-38
Pevonedistat	GDSC	https://pubchem.ncbi.nlm.nih.gov/compound/Pevonedistat
PFI-3	GDSC	https://pubchem.ncbi.nlm.nih.gov/compound/PFI-3
Camptothecin	GDSC	https://pubchem.ncbi.nlm.nih.gov/compound/Camptothecin
Irinotecan	GDSC	https://pubchem.ncbi.nlm.nih.gov/compound/Irinotecan
Oxaliplatin	GDSC	https://pubchem.ncbi.nlm.nih.gov/compound/Oxaliplatin
PRIMA-1MET	GDSC	https://pubchem.ncbi.nlm.nih.gov/compound/PRIMA-1MET
Niraparib	GDSC	https://pubchem.ncbi.nlm.nih.gov/compound/Niraparib
MK-1775	GDSC	https://pubchem.ncbi.nlm.nih.gov/compound/MK-1775
Dinaciclib	GDSC	https://pubchem.ncbi.nlm.nih.gov/compound/Dinaciclib
Fulvestrant	GDSC	https://pubchem.ncbi.nlm.nih.gov/compound/Fulvestrant
EPZ004777	GDSC	https://pubchem.ncbi.nlm.nih.gov/compound/EPZ004777
AZ960	GDSC	https://pubchem.ncbi.nlm.nih.gov/compound/AZ960
Epirubicin	GDSC	https://pubchem.ncbi.nlm.nih.gov/compound/Epirubicin
Cyclophosphamide	GDSC	https://pubchem.ncbi.nlm.nih.gov/compound/Cyclophosphamide
Sapatinib	GDSC	https://pubchem.ncbi.nlm.nih.gov/compound/Sapatinib
Uprosertib	GDSC	https://pubchem.ncbi.nlm.nih.gov/compound/Uprosertib
Alpelisib	GDSC	https://pubchem.ncbi.nlm.nih.gov/compound/Alpelisib
Taselisib	GDSC	https://pubchem.ncbi.nlm.nih.gov/compound/Taselisib
EPZ5676	GDSC	https://pubchem.ncbi.nlm.nih.gov/compound/EPZ5676
SCH772984	GDSC	https://pubchem.ncbi.nlm.nih.gov/compound/SCH772984
IWP-2	GDSC	https://pubchem.ncbi.nlm.nih.gov/compound/IWP-2
Leflunomide	GDSC	https://pubchem.ncbi.nlm.nih.gov/compound/Leflunomide
VE-822	GDSC	https://pubchem.ncbi.nlm.nih.gov/compound/VE-822
WZ4003	GDSC	https://pubchem.ncbi.nlm.nih.gov/compound/WZ4003
CZC24832	GDSC	https://pubchem.ncbi.nlm.nih.gov/compound/CZC24832
AZD5582	GDSC	https://pubchem.ncbi.nlm.nih.gov/compound/AZD5582
GSK2606414	GDSC	https://pubchem.ncbi.nlm.nih.gov/compound/GSK2606414
PFI3	GDSC	https://pubchem.ncbi.nlm.nih.gov/compound/PFI3
PCI-34051	GDSC	https://pubchem.ncbi.nlm.nih.gov/compound/PCI-34051
RVX-208	GDSC	https://pubchem.ncbi.nlm.nih.gov/compound/RVX-208
OTX015	GDSC	https://pubchem.ncbi.nlm.nih.gov/compound/OTX015
GSK343	GDSC	https://pubchem.ncbi.nlm.nih.gov/compound/GSK343
ML323	GDSC	https://pubchem.ncbi.nlm.nih.gov/compound/ML323
Entospletinib	GDSC	https://pubchem.ncbi.nlm.nih.gov/compound/Entospletinib
PRT062607	GDSC	https://pubchem.ncbi.nlm.nih.gov/compound/PRT062607
Ribociclib	GDSC	https://pubchem.ncbi.nlm.nih.gov/compound/Ribociclib
Picolinici-acid	GDSC	https://pubchem.ncbi.nlm.nih.gov/compound/Picolinici-acid
AZD4547	GDSC	https://pubchem.ncbi.nlm.nih.gov/compound/AZD4547
Ibrutinib	GDSC	https://pubchem.ncbi.nlm.nih.gov/compound/Ibrutinib
Zoledronate	GDSC	https://pubchem.ncbi.nlm.nih.gov/compound/Zoledronate
Acetalax	GDSC	https://pubchem.ncbi.nlm.nih.gov/compound/Acetalax
Carmustine	GDSC	https://pubchem.ncbi.nlm.nih.gov/compound/Carmustine
Topotecan	GDSC	https://pubchem.ncbi.nlm.nih.gov/compound/Topotecan
Teniposide	GDSC	https://pubchem.ncbi.nlm.nih.gov/compound/Teniposide
Mitoxantrone	GDSC	https://pubchem.ncbi.nlm.nih.gov/compound/Mitoxantrone
Dactinomycin	GDSC	https://pubchem.ncbi.nlm.nih.gov/compound/Dactinomycin
Fludarabine	GDSC	https://pubchem.ncbi.nlm.nih.gov/compound/Fludarabine
Nelarabine	GDSC	https://pubchem.ncbi.nlm.nih.gov/compound/Nelarabine
Vincristine	GDSC	https://pubchem.ncbi.nlm.nih.gov/compound/Vincristine
Podophyllotoxin bromide	GDSC	https://pubchem.ncbi.nlm.nih.gov/compound/Podophyllotoxin bromide
Dihydrorotenone	GDSC	https://pubchem.ncbi.nlm.nih.gov/compound/Dihydrorotenone
Gallibiscoquinazole	GDSC	https://pubchem.ncbi.nlm.nih.gov/compound/Gallibiscoquinazole
Elephantin	GDSC	https://pubchem.ncbi.nlm.nih.gov/compound/Elephantin
Sinularin	GDSC	https://pubchem.ncbi.nlm.nih.gov/compound/Sinularin
Sabutoclax	GDSC	https://pubchem.ncbi.nlm.nih.gov/compound/Sabutoclax
LY2109761	GDSC	https://pubchem.ncbi.nlm.nih.gov/compound/LY2109761
OF-1	GDSC	https://pubchem.ncbi.nlm.nih.gov/compound/OF-1
MN-64	GDSC	https://pubchem.ncbi.nlm.nih.gov/compound/MN-64
KRAS (G12C) Inhibitor-12	GDSC	https://pubchem.ncbi.nlm.nih.gov/compound/KRAS (G12C) Inhibitor-12
BDP-00009066	GDSC	https://pubchem.ncbi.nlm.nih.gov/compound/BDP-00009066
Buparlisib	GDSC	https://pubchem.ncbi.nlm.nih.gov/compound/Buparlisib
Ulixertinib	GDSC	https://pubchem.ncbi.nlm.nih.gov/compound/Ulixertinib
Venetoclax	GDSC	https://pubchem.ncbi.nlm.nih.gov/compound/Venetoclax
ABT737	GDSC	https://pubchem.ncbi.nlm.nih.gov/compound/ABT737
Afuresertib	GDSC	https://pubchem.ncbi.nlm.nih.gov/compound/Afuresertib
AGI-5198	GDSC	https://pubchem.ncbi.nlm.nih.gov/compound/AGI-5198
AZD3759	GDSC	https://pubchem.ncbi.nlm.nih.gov/compound/AZD3759
AZD5363	GDSC	https://pubchem.ncbi.nlm.nih.gov/compound/AZD5363
AZD6738	GDSC	https://pubchem.ncbi.nlm.nih.gov/compound/AZD6738
AZD8186	GDSC	https://pubchem.ncbi.nlm.nih.gov/compound/AZD8186
Osimertinib	GDSC	https://pubchem.ncbi.nlm.nih.gov/compound/Osimertinib
Cediranib	GDSC	https://pubchem.ncbi.nlm.nih.gov/compound/Cediranib
Ipatasertib	GDSC	https://pubchem.ncbi.nlm.nih.gov/compound/Ipatasertib
GDC0810	GDSC	https://pubchem.ncbi.nlm.nih.gov/compound/GDC0810
GNE-317	GDSC	https://pubchem.ncbi.nlm.nih.gov/compound/GNE-317
GSK2578215A	GDSC	https://pubchem.ncbi.nlm.nih.gov/compound/GSK2578215A
I-BRD9	GDSC	https://pubchem.ncbi.nlm.nih.gov/compound/I-BRD9
Telomerase Inhibitor IX	GDSC	https://pubchem.ncbi.nlm.nih.gov/compound/Telomerase Inhibitor IX
MIRA-1	GDSC	https://pubchem.ncbi.nlm.nih.gov/compound/MIRA-1
NVP-ADW742	GDSC	https://pubchem.ncbi.nlm.nih.gov/compound/NVP-ADW742
P22077	GDSC	https://pubchem.ncbi.nlm.nih.gov/compound/P22077
Savolitinib	GDSC	https://pubchem.ncbi.nlm.nih.gov/compound/Savolitinib
UMI-77	GDSC	https://pubchem.ncbi.nlm.nih.gov/compound/UMI-77
WIKI4	GDSC	https://pubchem.ncbi.nlm.nih.gov/compound/WIKI4
WEHI-539	GDSC	https://pubchem.ncbi.nlm.nih.gov/compound/WEHI-539
BPD-00008900	GDSC	https://pubchem.ncbi.nlm.nih.gov/compound/BPD-00008900
BIBR-1532	GDSC	https://pubchem.ncbi.nlm.nih.gov/compound/BIBR-1532
Pyridostatin	GDSC	https://pubchem.ncbi.nlm.nih.gov/compound/Pyridostatin
AMG-319	GDSC	https://pubchem.ncbi.nlm.nih.gov/compound/AMG-319
MK-8776	GDSC	https://pubchem.ncbi.nlm.nih.gov/compound/MK-8776
LJI308	GDSC	https://pubchem.ncbi.nlm.nih.gov/compound/LJI308
AZ6102	GDSC	https://pubchem.ncbi.nlm.nih.gov/compound/AZ6102
GSK591	GDSC	https://pubchem.ncbi.nlm.nih.gov/compound/GSK591
VE821	GDSC	https://pubchem.ncbi.nlm.nih.gov/compound/VE821
AT13148	GDSC	https://pubchem.ncbi.nlm.nih.gov/compound/AT13148

## Sheet: Table S4
Table S4. Details of drugs from CMAP database used in comboSC.
Drugs	Datebase	URLs
metformin	CMAP	https://pubchem.ncbi.nlm.nih.gov/compound/metformin
phenformin	CMAP	https://pubchem.ncbi.nlm.nih.gov/compound/phenformin
valproic acid	CMAP	https://pubchem.ncbi.nlm.nih.gov/compound/valproic acid
estradiol	CMAP	https://pubchem.ncbi.nlm.nih.gov/compound/estradiol
alpha-estradiol	CMAP	https://pubchem.ncbi.nlm.nih.gov/compound/alpha-estradiol
dexamethasone	CMAP	https://pubchem.ncbi.nlm.nih.gov/compound/dexamethasone
mesalazine	CMAP	https://pubchem.ncbi.nlm.nih.gov/compound/mesalazine
chlorpropamide	CMAP	https://pubchem.ncbi.nlm.nih.gov/compound/chlorpropamide
tolbutamide	CMAP	https://pubchem.ncbi.nlm.nih.gov/compound/tolbutamide
tamoxifen	CMAP	https://pubchem.ncbi.nlm.nih.gov/compound/tamoxifen
verapamil	CMAP	https://pubchem.ncbi.nlm.nih.gov/compound/verapamil
rofecoxib	CMAP	https://pubchem.ncbi.nlm.nih.gov/compound/rofecoxib
amitriptyline	CMAP	https://pubchem.ncbi.nlm.nih.gov/compound/amitriptyline
sulindac	CMAP	https://pubchem.ncbi.nlm.nih.gov/compound/sulindac
tacrolimus	CMAP	https://pubchem.ncbi.nlm.nih.gov/compound/tacrolimus
15-delta prostaglandin J2	CMAP	https://pubchem.ncbi.nlm.nih.gov/compound/15-delta prostaglandin J2
raloxifene	CMAP	https://pubchem.ncbi.nlm.nih.gov/compound/raloxifene
nordihydroguaiaretic acid	CMAP	https://pubchem.ncbi.nlm.nih.gov/compound/nordihydroguaiaretic acid
sulfasalazine	CMAP	https://pubchem.ncbi.nlm.nih.gov/compound/sulfasalazine
celecoxib	CMAP	https://pubchem.ncbi.nlm.nih.gov/compound/celecoxib
LM-1685	CMAP	https://pubchem.ncbi.nlm.nih.gov/compound/LM-1685
SC-58125	CMAP	https://pubchem.ncbi.nlm.nih.gov/compound/SC-58125
tanespimycin	CMAP	https://pubchem.ncbi.nlm.nih.gov/compound/tanespimycin
TTNPB	CMAP	https://pubchem.ncbi.nlm.nih.gov/compound/TTNPB
tretinoin	CMAP	https://pubchem.ncbi.nlm.nih.gov/compound/tretinoin
LY-294002	CMAP	https://pubchem.ncbi.nlm.nih.gov/compound/LY-294002
ciclosporin	CMAP	https://pubchem.ncbi.nlm.nih.gov/compound/ciclosporin
indometacin	CMAP	https://pubchem.ncbi.nlm.nih.gov/compound/indometacin
clofibrate	CMAP	https://pubchem.ncbi.nlm.nih.gov/compound/clofibrate
MK-886	CMAP	https://pubchem.ncbi.nlm.nih.gov/compound/MK-886
prednisolone	CMAP	https://pubchem.ncbi.nlm.nih.gov/compound/prednisolone
thalidomide	CMAP	https://pubchem.ncbi.nlm.nih.gov/compound/thalidomide
genistein	CMAP	https://pubchem.ncbi.nlm.nih.gov/compound/genistein
fludrocortisone	CMAP	https://pubchem.ncbi.nlm.nih.gov/compound/fludrocortisone
quercetin	CMAP	https://pubchem.ncbi.nlm.nih.gov/compound/quercetin
exisulind	CMAP	https://pubchem.ncbi.nlm.nih.gov/compound/exisulind
fulvestrant	CMAP	https://pubchem.ncbi.nlm.nih.gov/compound/fulvestrant
monastrol	CMAP	https://pubchem.ncbi.nlm.nih.gov/compound/monastrol
staurosporine	CMAP	https://pubchem.ncbi.nlm.nih.gov/compound/staurosporine
NU-1025	CMAP	https://pubchem.ncbi.nlm.nih.gov/compound/NU-1025
acetylsalicylic acid	CMAP	https://pubchem.ncbi.nlm.nih.gov/compound/acetylsalicylic acid
flufenamic acid	CMAP	https://pubchem.ncbi.nlm.nih.gov/compound/flufenamic acid
monorden	CMAP	https://pubchem.ncbi.nlm.nih.gov/compound/monorden
sirolimus	CMAP	https://pubchem.ncbi.nlm.nih.gov/compound/sirolimus
arachidonyltrifluoromethane	CMAP	https://pubchem.ncbi.nlm.nih.gov/compound/arachidonyltrifluoromethane
trichostatin A	CMAP	https://pubchem.ncbi.nlm.nih.gov/compound/trichostatin A
diclofenac	CMAP	https://pubchem.ncbi.nlm.nih.gov/compound/diclofenac
mercaptopurine	CMAP	https://pubchem.ncbi.nlm.nih.gov/compound/mercaptopurine
nifedipine	CMAP	https://pubchem.ncbi.nlm.nih.gov/compound/nifedipine
nitrendipine	CMAP	https://pubchem.ncbi.nlm.nih.gov/compound/nitrendipine
felodipine	CMAP	https://pubchem.ncbi.nlm.nih.gov/compound/felodipine
azathioprine	CMAP	https://pubchem.ncbi.nlm.nih.gov/compound/azathioprine
sodium phenylbutyrate	CMAP	https://pubchem.ncbi.nlm.nih.gov/compound/sodium phenylbutyrate
novobiocin	CMAP	https://pubchem.ncbi.nlm.nih.gov/compound/novobiocin
fasudil	CMAP	https://pubchem.ncbi.nlm.nih.gov/compound/fasudil
imatinib	CMAP	https://pubchem.ncbi.nlm.nih.gov/compound/imatinib
pirinixic acid	CMAP	https://pubchem.ncbi.nlm.nih.gov/compound/pirinixic acid
rosiglitazone	CMAP	https://pubchem.ncbi.nlm.nih.gov/compound/rosiglitazone
troglitazone	CMAP	https://pubchem.ncbi.nlm.nih.gov/compound/troglitazone
cobalt chloride	CMAP	https://pubchem.ncbi.nlm.nih.gov/compound/cobalt chloride
wortmannin	CMAP	https://pubchem.ncbi.nlm.nih.gov/compound/wortmannin
tetraethylenepentamine	CMAP	https://pubchem.ncbi.nlm.nih.gov/compound/tetraethylenepentamine
clozapine	CMAP	https://pubchem.ncbi.nlm.nih.gov/compound/clozapine
thioridazine	CMAP	https://pubchem.ncbi.nlm.nih.gov/compound/thioridazine
haloperidol	CMAP	https://pubchem.ncbi.nlm.nih.gov/compound/haloperidol
chlorpromazine	CMAP	https://pubchem.ncbi.nlm.nih.gov/compound/chlorpromazine
trifluoperazine	CMAP	https://pubchem.ncbi.nlm.nih.gov/compound/trifluoperazine
iloprost	CMAP	https://pubchem.ncbi.nlm.nih.gov/compound/iloprost
copper sulfate	CMAP	https://pubchem.ncbi.nlm.nih.gov/compound/copper sulfate
W-13	CMAP	https://pubchem.ncbi.nlm.nih.gov/compound/W-13
arachidonic acid	CMAP	https://pubchem.ncbi.nlm.nih.gov/compound/arachidonic acid
prochlorperazine	CMAP	https://pubchem.ncbi.nlm.nih.gov/compound/prochlorperazine
quinpirole	CMAP	https://pubchem.ncbi.nlm.nih.gov/compound/quinpirole
deferoxamine	CMAP	https://pubchem.ncbi.nlm.nih.gov/compound/deferoxamine
calmidazolium	CMAP	https://pubchem.ncbi.nlm.nih.gov/compound/calmidazolium
fluphenazine	CMAP	https://pubchem.ncbi.nlm.nih.gov/compound/fluphenazine
4-hydroxyphenazone	CMAP	https://pubchem.ncbi.nlm.nih.gov/compound/4-hydroxyphenazone
butein	CMAP	https://pubchem.ncbi.nlm.nih.gov/compound/butein
bucladesine	CMAP	https://pubchem.ncbi.nlm.nih.gov/compound/bucladesine
probucol	CMAP	https://pubchem.ncbi.nlm.nih.gov/compound/probucol
geldanamycin	CMAP	https://pubchem.ncbi.nlm.nih.gov/compound/geldanamycin
resveratrol	CMAP	https://pubchem.ncbi.nlm.nih.gov/compound/resveratrol
nocodazole	CMAP	https://pubchem.ncbi.nlm.nih.gov/compound/nocodazole
colchicine	CMAP	https://pubchem.ncbi.nlm.nih.gov/compound/colchicine
benserazide	CMAP	https://pubchem.ncbi.nlm.nih.gov/compound/benserazide
pentamidine	CMAP	https://pubchem.ncbi.nlm.nih.gov/compound/pentamidine
paclitaxel	CMAP	https://pubchem.ncbi.nlm.nih.gov/compound/paclitaxel
docosahexaenoic acid ethyl ester	CMAP	https://pubchem.ncbi.nlm.nih.gov/compound/docosahexaenoic acid ethyl ester
butirosin	CMAP	https://pubchem.ncbi.nlm.nih.gov/compound/butirosin
colforsin	CMAP	https://pubchem.ncbi.nlm.nih.gov/compound/colforsin
rottlerin	CMAP	https://pubchem.ncbi.nlm.nih.gov/compound/rottlerin
prazosin	CMAP	https://pubchem.ncbi.nlm.nih.gov/compound/prazosin
5252917	CMAP	https://pubchem.ncbi.nlm.nih.gov/compound/5252917
Y-27632	CMAP	https://pubchem.ncbi.nlm.nih.gov/compound/Y-27632
5255229	CMAP	https://pubchem.ncbi.nlm.nih.gov/compound/5255229
5211181	CMAP	https://pubchem.ncbi.nlm.nih.gov/compound/5211181
carbamazepine	CMAP	https://pubchem.ncbi.nlm.nih.gov/compound/carbamazepine
blebbistatin	CMAP	https://pubchem.ncbi.nlm.nih.gov/compound/blebbistatin
5248896	CMAP	https://pubchem.ncbi.nlm.nih.gov/compound/5248896
5224221	CMAP	https://pubchem.ncbi.nlm.nih.gov/compound/5224221
5279552	CMAP	https://pubchem.ncbi.nlm.nih.gov/compound/5279552
5253409	CMAP	https://pubchem.ncbi.nlm.nih.gov/compound/5253409
5230742	CMAP	https://pubchem.ncbi.nlm.nih.gov/compound/5230742
oxaprozin	CMAP	https://pubchem.ncbi.nlm.nih.gov/compound/oxaprozin
quinostatin	CMAP	https://pubchem.ncbi.nlm.nih.gov/compound/quinostatin
ikarugamycin	CMAP	https://pubchem.ncbi.nlm.nih.gov/compound/ikarugamycin
5182598	CMAP	https://pubchem.ncbi.nlm.nih.gov/compound/5182598
pyrvinium	CMAP	https://pubchem.ncbi.nlm.nih.gov/compound/pyrvinium
ionomycin	CMAP	https://pubchem.ncbi.nlm.nih.gov/compound/ionomycin
depudecin	CMAP	https://pubchem.ncbi.nlm.nih.gov/compound/depudecin
5186223	CMAP	https://pubchem.ncbi.nlm.nih.gov/compound/5186223
celastrol	CMAP	https://pubchem.ncbi.nlm.nih.gov/compound/celastrol
5286656	CMAP	https://pubchem.ncbi.nlm.nih.gov/compound/5286656
5149715	CMAP	https://pubchem.ncbi.nlm.nih.gov/compound/5149715
5162773	CMAP	https://pubchem.ncbi.nlm.nih.gov/compound/5162773
pararosaniline	CMAP	https://pubchem.ncbi.nlm.nih.gov/compound/pararosaniline
5152487	CMAP	https://pubchem.ncbi.nlm.nih.gov/compound/5152487
5213008	CMAP	https://pubchem.ncbi.nlm.nih.gov/compound/5213008
5186324	CMAP	https://pubchem.ncbi.nlm.nih.gov/compound/5186324
5114445	CMAP	https://pubchem.ncbi.nlm.nih.gov/compound/5114445
5151277	CMAP	https://pubchem.ncbi.nlm.nih.gov/compound/5151277
5109870	CMAP	https://pubchem.ncbi.nlm.nih.gov/compound/5109870
clotrimazole	CMAP	https://pubchem.ncbi.nlm.nih.gov/compound/clotrimazole
5140203	CMAP	https://pubchem.ncbi.nlm.nih.gov/compound/5140203
HC toxin	CMAP	https://pubchem.ncbi.nlm.nih.gov/compound/HC toxin
topiramate	CMAP	https://pubchem.ncbi.nlm.nih.gov/compound/topiramate
decitabine	CMAP	https://pubchem.ncbi.nlm.nih.gov/compound/decitabine
alvespimycin	CMAP	https://pubchem.ncbi.nlm.nih.gov/compound/alvespimycin
vorinostat	CMAP	https://pubchem.ncbi.nlm.nih.gov/compound/vorinostat
(-)-catechin	CMAP	https://pubchem.ncbi.nlm.nih.gov/compound/(-)-catechin
demecolcine	CMAP	https://pubchem.ncbi.nlm.nih.gov/compound/demecolcine
monensin	CMAP	https://pubchem.ncbi.nlm.nih.gov/compound/monensin
12,13-EODE	CMAP	https://pubchem.ncbi.nlm.nih.gov/compound/12,13-EODE
3-hydroxy-DL-kynurenine	CMAP	https://pubchem.ncbi.nlm.nih.gov/compound/3-hydroxy-DL-kynurenine
doxycycline	CMAP	https://pubchem.ncbi.nlm.nih.gov/compound/doxycycline
tyrphostin AG-825	CMAP	https://pubchem.ncbi.nlm.nih.gov/compound/tyrphostin AG-825
phenanthridinone	CMAP	https://pubchem.ncbi.nlm.nih.gov/compound/phenanthridinone
yohimbine	CMAP	https://pubchem.ncbi.nlm.nih.gov/compound/yohimbine
DL-PPMP	CMAP	https://pubchem.ncbi.nlm.nih.gov/compound/DL-PPMP
cytochalasin B	CMAP	https://pubchem.ncbi.nlm.nih.gov/compound/cytochalasin B
BW-B70C	CMAP	https://pubchem.ncbi.nlm.nih.gov/compound/BW-B70C
minocycline	CMAP	https://pubchem.ncbi.nlm.nih.gov/compound/minocycline
phentolamine	CMAP	https://pubchem.ncbi.nlm.nih.gov/compound/phentolamine
MG-132	CMAP	https://pubchem.ncbi.nlm.nih.gov/compound/MG-132
tyrphostin AG-1478	CMAP	https://pubchem.ncbi.nlm.nih.gov/compound/tyrphostin AG-1478
procainamide	CMAP	https://pubchem.ncbi.nlm.nih.gov/compound/procainamide
thioguanosine	CMAP	https://pubchem.ncbi.nlm.nih.gov/compound/thioguanosine
amoxicillin	CMAP	https://pubchem.ncbi.nlm.nih.gov/compound/amoxicillin
benfluorex	CMAP	https://pubchem.ncbi.nlm.nih.gov/compound/benfluorex
naftidrofuryl	CMAP	https://pubchem.ncbi.nlm.nih.gov/compound/naftidrofuryl
pentoxyverine	CMAP	https://pubchem.ncbi.nlm.nih.gov/compound/pentoxyverine
clomifene	CMAP	https://pubchem.ncbi.nlm.nih.gov/compound/clomifene
zoxazolamine	CMAP	https://pubchem.ncbi.nlm.nih.gov/compound/zoxazolamine
N6-methyladenosine	CMAP	https://pubchem.ncbi.nlm.nih.gov/compound/N6-methyladenosine
chlorprothixene	CMAP	https://pubchem.ncbi.nlm.nih.gov/compound/chlorprothixene
cefalexin	CMAP	https://pubchem.ncbi.nlm.nih.gov/compound/cefalexin
bepridil	CMAP	https://pubchem.ncbi.nlm.nih.gov/compound/bepridil
bezafibrate	CMAP	https://pubchem.ncbi.nlm.nih.gov/compound/bezafibrate
dequalinium chloride	CMAP	https://pubchem.ncbi.nlm.nih.gov/compound/dequalinium chloride
oxantel	CMAP	https://pubchem.ncbi.nlm.nih.gov/compound/oxantel
tacrine	CMAP	https://pubchem.ncbi.nlm.nih.gov/compound/tacrine
guanfacine	CMAP	https://pubchem.ncbi.nlm.nih.gov/compound/guanfacine
ritodrine	CMAP	https://pubchem.ncbi.nlm.nih.gov/compound/ritodrine
dextromethorphan	CMAP	https://pubchem.ncbi.nlm.nih.gov/compound/dextromethorphan
buspirone	CMAP	https://pubchem.ncbi.nlm.nih.gov/compound/buspirone
ketoconazole	CMAP	https://pubchem.ncbi.nlm.nih.gov/compound/ketoconazole
bisoprolol	CMAP	https://pubchem.ncbi.nlm.nih.gov/compound/bisoprolol
flupentixol	CMAP	https://pubchem.ncbi.nlm.nih.gov/compound/flupentixol
droperidol	CMAP	https://pubchem.ncbi.nlm.nih.gov/compound/droperidol
benzbromarone	CMAP	https://pubchem.ncbi.nlm.nih.gov/compound/benzbromarone
clebopride	CMAP	https://pubchem.ncbi.nlm.nih.gov/compound/clebopride
fusidic acid	CMAP	https://pubchem.ncbi.nlm.nih.gov/compound/fusidic acid
hesperidin	CMAP	https://pubchem.ncbi.nlm.nih.gov/compound/hesperidin
testosterone	CMAP	https://pubchem.ncbi.nlm.nih.gov/compound/testosterone
androsterone	CMAP	https://pubchem.ncbi.nlm.nih.gov/compound/androsterone
suloctidil	CMAP	https://pubchem.ncbi.nlm.nih.gov/compound/suloctidil
coralyne	CMAP	https://pubchem.ncbi.nlm.nih.gov/compound/coralyne
domperidone	CMAP	https://pubchem.ncbi.nlm.nih.gov/compound/domperidone
ouabain	CMAP	https://pubchem.ncbi.nlm.nih.gov/compound/ouabain
arecoline	CMAP	https://pubchem.ncbi.nlm.nih.gov/compound/arecoline
anisomycin	CMAP	https://pubchem.ncbi.nlm.nih.gov/compound/anisomycin
carcinine	CMAP	https://pubchem.ncbi.nlm.nih.gov/compound/carcinine
corticosterone	CMAP	https://pubchem.ncbi.nlm.nih.gov/compound/corticosterone
fusaric acid	CMAP	https://pubchem.ncbi.nlm.nih.gov/compound/fusaric acid
lactobionic acid	CMAP	https://pubchem.ncbi.nlm.nih.gov/compound/lactobionic acid
cefixime	CMAP	https://pubchem.ncbi.nlm.nih.gov/compound/cefixime
calcium pantothenate	CMAP	https://pubchem.ncbi.nlm.nih.gov/compound/calcium pantothenate
levothyroxine sodium	CMAP	https://pubchem.ncbi.nlm.nih.gov/compound/levothyroxine sodium
carbarsone	CMAP	https://pubchem.ncbi.nlm.nih.gov/compound/carbarsone
carisoprodol	CMAP	https://pubchem.ncbi.nlm.nih.gov/compound/carisoprodol
cyanocobalamin	CMAP	https://pubchem.ncbi.nlm.nih.gov/compound/cyanocobalamin
SR-95531	CMAP	https://pubchem.ncbi.nlm.nih.gov/compound/SR-95531
lumicolchicine	CMAP	https://pubchem.ncbi.nlm.nih.gov/compound/lumicolchicine
metrizamide	CMAP	https://pubchem.ncbi.nlm.nih.gov/compound/metrizamide
cefotetan	CMAP	https://pubchem.ncbi.nlm.nih.gov/compound/cefotetan
dl-alpha tocopherol	CMAP	https://pubchem.ncbi.nlm.nih.gov/compound/dl-alpha tocopherol
apigenin	CMAP	https://pubchem.ncbi.nlm.nih.gov/compound/apigenin
7-aminocephalosporanic acid	CMAP	https://pubchem.ncbi.nlm.nih.gov/compound/7-aminocephalosporanic acid
cefadroxil	CMAP	https://pubchem.ncbi.nlm.nih.gov/compound/cefadroxil
ginkgolide A	CMAP	https://pubchem.ncbi.nlm.nih.gov/compound/ginkgolide A
lysergol	CMAP	https://pubchem.ncbi.nlm.nih.gov/compound/lysergol
N-acetylmuramic acid	CMAP	https://pubchem.ncbi.nlm.nih.gov/compound/N-acetylmuramic acid
piperine	CMAP	https://pubchem.ncbi.nlm.nih.gov/compound/piperine
pepstatin	CMAP	https://pubchem.ncbi.nlm.nih.gov/compound/pepstatin
N-acetyl-L-aspartic acid	CMAP	https://pubchem.ncbi.nlm.nih.gov/compound/N-acetyl-L-aspartic acid
Chicago Sky Blue 6B	CMAP	https://pubchem.ncbi.nlm.nih.gov/compound/Chicago Sky Blue 6B
cyclobenzaprine	CMAP	https://pubchem.ncbi.nlm.nih.gov/compound/cyclobenzaprine
mebhydrolin	CMAP	https://pubchem.ncbi.nlm.nih.gov/compound/mebhydrolin
myricetin	CMAP	https://pubchem.ncbi.nlm.nih.gov/compound/myricetin
brompheniramine	CMAP	https://pubchem.ncbi.nlm.nih.gov/compound/brompheniramine
SR-95639A	CMAP	https://pubchem.ncbi.nlm.nih.gov/compound/SR-95639A
bacampicillin	CMAP	https://pubchem.ncbi.nlm.nih.gov/compound/bacampicillin
buflomedil	CMAP	https://pubchem.ncbi.nlm.nih.gov/compound/buflomedil
digitoxigenin	CMAP	https://pubchem.ncbi.nlm.nih.gov/compound/digitoxigenin
carteolol	CMAP	https://pubchem.ncbi.nlm.nih.gov/compound/carteolol
meclocycline	CMAP	https://pubchem.ncbi.nlm.nih.gov/compound/meclocycline
naringenin	CMAP	https://pubchem.ncbi.nlm.nih.gov/compound/naringenin
primaquine	CMAP	https://pubchem.ncbi.nlm.nih.gov/compound/primaquine
amantadine	CMAP	https://pubchem.ncbi.nlm.nih.gov/compound/amantadine
betulinic acid	CMAP	https://pubchem.ncbi.nlm.nih.gov/compound/betulinic acid
chlorogenic acid	CMAP	https://pubchem.ncbi.nlm.nih.gov/compound/chlorogenic acid
naltrexone	CMAP	https://pubchem.ncbi.nlm.nih.gov/compound/naltrexone
mefloquine	CMAP	https://pubchem.ncbi.nlm.nih.gov/compound/mefloquine
astemizole	CMAP	https://pubchem.ncbi.nlm.nih.gov/compound/astemizole
ivermectin	CMAP	https://pubchem.ncbi.nlm.nih.gov/compound/ivermectin
diazoxide	CMAP	https://pubchem.ncbi.nlm.nih.gov/compound/diazoxide
disulfiram	CMAP	https://pubchem.ncbi.nlm.nih.gov/compound/disulfiram
atropine oxide	CMAP	https://pubchem.ncbi.nlm.nih.gov/compound/atropine oxide
chlorphenamine	CMAP	https://pubchem.ncbi.nlm.nih.gov/compound/chlorphenamine
isoconazole	CMAP	https://pubchem.ncbi.nlm.nih.gov/compound/isoconazole
clindamycin	CMAP	https://pubchem.ncbi.nlm.nih.gov/compound/clindamycin
nicergoline	CMAP	https://pubchem.ncbi.nlm.nih.gov/compound/nicergoline
gallamine triethiodide	CMAP	https://pubchem.ncbi.nlm.nih.gov/compound/gallamine triethiodide
aminophenazone	CMAP	https://pubchem.ncbi.nlm.nih.gov/compound/aminophenazone
acetylsalicylsalicylic acid	CMAP	https://pubchem.ncbi.nlm.nih.gov/compound/acetylsalicylsalicylic acid
nomifensine	CMAP	https://pubchem.ncbi.nlm.nih.gov/compound/nomifensine
nalbuphine	CMAP	https://pubchem.ncbi.nlm.nih.gov/compound/nalbuphine
spironolactone	CMAP	https://pubchem.ncbi.nlm.nih.gov/compound/spironolactone
terfenadine	CMAP	https://pubchem.ncbi.nlm.nih.gov/compound/terfenadine
neomycin	CMAP	https://pubchem.ncbi.nlm.nih.gov/compound/neomycin
mianserin	CMAP	https://pubchem.ncbi.nlm.nih.gov/compound/mianserin
dizocilpine	CMAP	https://pubchem.ncbi.nlm.nih.gov/compound/dizocilpine
picotamide	CMAP	https://pubchem.ncbi.nlm.nih.gov/compound/picotamide
pirenzepine	CMAP	https://pubchem.ncbi.nlm.nih.gov/compound/pirenzepine
cefotaxime	CMAP	https://pubchem.ncbi.nlm.nih.gov/compound/cefotaxime
thioproperazine	CMAP	https://pubchem.ncbi.nlm.nih.gov/compound/thioproperazine
dihydrostreptomycin	CMAP	https://pubchem.ncbi.nlm.nih.gov/compound/dihydrostreptomycin
pindolol	CMAP	https://pubchem.ncbi.nlm.nih.gov/compound/pindolol
acenocoumarol	CMAP	https://pubchem.ncbi.nlm.nih.gov/compound/acenocoumarol
triamcinolone	CMAP	https://pubchem.ncbi.nlm.nih.gov/compound/triamcinolone
tetracycline	CMAP	https://pubchem.ncbi.nlm.nih.gov/compound/tetracycline
dihydroergotamine	CMAP	https://pubchem.ncbi.nlm.nih.gov/compound/dihydroergotamine
isoniazid	CMAP	https://pubchem.ncbi.nlm.nih.gov/compound/isoniazid
tranexamic acid	CMAP	https://pubchem.ncbi.nlm.nih.gov/compound/tranexamic acid
ampyrone	CMAP	https://pubchem.ncbi.nlm.nih.gov/compound/ampyrone
midodrine	CMAP	https://pubchem.ncbi.nlm.nih.gov/compound/midodrine
ranitidine	CMAP	https://pubchem.ncbi.nlm.nih.gov/compound/ranitidine
piroxicam	CMAP	https://pubchem.ncbi.nlm.nih.gov/compound/piroxicam
norfloxacin	CMAP	https://pubchem.ncbi.nlm.nih.gov/compound/norfloxacin
etodolac	CMAP	https://pubchem.ncbi.nlm.nih.gov/compound/etodolac
pentetrazol	CMAP	https://pubchem.ncbi.nlm.nih.gov/compound/pentetrazol
etofylline	CMAP	https://pubchem.ncbi.nlm.nih.gov/compound/etofylline
levamisole	CMAP	https://pubchem.ncbi.nlm.nih.gov/compound/levamisole
tiratricol	CMAP	https://pubchem.ncbi.nlm.nih.gov/compound/tiratricol
pyrantel	CMAP	https://pubchem.ncbi.nlm.nih.gov/compound/pyrantel
antimycin A	CMAP	https://pubchem.ncbi.nlm.nih.gov/compound/antimycin A
scopolamine N-oxide	CMAP	https://pubchem.ncbi.nlm.nih.gov/compound/scopolamine N-oxide
chlorzoxazone	CMAP	https://pubchem.ncbi.nlm.nih.gov/compound/chlorzoxazone
tranylcypromine	CMAP	https://pubchem.ncbi.nlm.nih.gov/compound/tranylcypromine
pargyline	CMAP	https://pubchem.ncbi.nlm.nih.gov/compound/pargyline
oxolinic acid	CMAP	https://pubchem.ncbi.nlm.nih.gov/compound/oxolinic acid
fenspiride	CMAP	https://pubchem.ncbi.nlm.nih.gov/compound/fenspiride
xylometazoline	CMAP	https://pubchem.ncbi.nlm.nih.gov/compound/xylometazoline
hyoscyamine	CMAP	https://pubchem.ncbi.nlm.nih.gov/compound/hyoscyamine
ornidazole	CMAP	https://pubchem.ncbi.nlm.nih.gov/compound/ornidazole
alverine	CMAP	https://pubchem.ncbi.nlm.nih.gov/compound/alverine
nimesulide	CMAP	https://pubchem.ncbi.nlm.nih.gov/compound/nimesulide
flumequine	CMAP	https://pubchem.ncbi.nlm.nih.gov/compound/flumequine
gemfibrozil	CMAP	https://pubchem.ncbi.nlm.nih.gov/compound/gemfibrozil
oxymetazoline	CMAP	https://pubchem.ncbi.nlm.nih.gov/compound/oxymetazoline
chlorphenesin	CMAP	https://pubchem.ncbi.nlm.nih.gov/compound/chlorphenesin
ethosuximide	CMAP	https://pubchem.ncbi.nlm.nih.gov/compound/ethosuximide
aztreonam	CMAP	https://pubchem.ncbi.nlm.nih.gov/compound/aztreonam
hydrastinine	CMAP	https://pubchem.ncbi.nlm.nih.gov/compound/hydrastinine
tolfenamic acid	CMAP	https://pubchem.ncbi.nlm.nih.gov/compound/tolfenamic acid
mefexamide	CMAP	https://pubchem.ncbi.nlm.nih.gov/compound/mefexamide
nifenazone	CMAP	https://pubchem.ncbi.nlm.nih.gov/compound/nifenazone
metampicillin	CMAP	https://pubchem.ncbi.nlm.nih.gov/compound/metampicillin
mafenide	CMAP	https://pubchem.ncbi.nlm.nih.gov/compound/mafenide
iproniazid	CMAP	https://pubchem.ncbi.nlm.nih.gov/compound/iproniazid
cloxacillin	CMAP	https://pubchem.ncbi.nlm.nih.gov/compound/cloxacillin
pentoxifylline	CMAP	https://pubchem.ncbi.nlm.nih.gov/compound/pentoxifylline
meclofenamic acid	CMAP	https://pubchem.ncbi.nlm.nih.gov/compound/meclofenamic acid
sulfathiazole	CMAP	https://pubchem.ncbi.nlm.nih.gov/compound/sulfathiazole
cimetidine	CMAP	https://pubchem.ncbi.nlm.nih.gov/compound/cimetidine
troleandomycin	CMAP	https://pubchem.ncbi.nlm.nih.gov/compound/troleandomycin
naphazoline	CMAP	https://pubchem.ncbi.nlm.nih.gov/compound/naphazoline
sulpiride	CMAP	https://pubchem.ncbi.nlm.nih.gov/compound/sulpiride
minaprine	CMAP	https://pubchem.ncbi.nlm.nih.gov/compound/minaprine
cinchocaine	CMAP	https://pubchem.ncbi.nlm.nih.gov/compound/cinchocaine
amiloride	CMAP	https://pubchem.ncbi.nlm.nih.gov/compound/amiloride
levodopa	CMAP	https://pubchem.ncbi.nlm.nih.gov/compound/levodopa
doxylamine	CMAP	https://pubchem.ncbi.nlm.nih.gov/compound/doxylamine
pyrimethamine	CMAP	https://pubchem.ncbi.nlm.nih.gov/compound/pyrimethamine
ticlopidine	CMAP	https://pubchem.ncbi.nlm.nih.gov/compound/ticlopidine
oxybuprocaine	CMAP	https://pubchem.ncbi.nlm.nih.gov/compound/oxybuprocaine
miconazole	CMAP	https://pubchem.ncbi.nlm.nih.gov/compound/miconazole
prednisone	CMAP	https://pubchem.ncbi.nlm.nih.gov/compound/prednisone
amprolium	CMAP	https://pubchem.ncbi.nlm.nih.gov/compound/amprolium
idoxuridine	CMAP	https://pubchem.ncbi.nlm.nih.gov/compound/idoxuridine
ethambutol	CMAP	https://pubchem.ncbi.nlm.nih.gov/compound/ethambutol
hexamethonium bromide	CMAP	https://pubchem.ncbi.nlm.nih.gov/compound/hexamethonium bromide
dicycloverine	CMAP	https://pubchem.ncbi.nlm.nih.gov/compound/dicycloverine
oxetacaine	CMAP	https://pubchem.ncbi.nlm.nih.gov/compound/oxetacaine
isoxsuprine	CMAP	https://pubchem.ncbi.nlm.nih.gov/compound/isoxsuprine
hydrochlorothiazide	CMAP	https://pubchem.ncbi.nlm.nih.gov/compound/hydrochlorothiazide
captopril	CMAP	https://pubchem.ncbi.nlm.nih.gov/compound/captopril
phenazone	CMAP	https://pubchem.ncbi.nlm.nih.gov/compound/phenazone
diflunisal	CMAP	https://pubchem.ncbi.nlm.nih.gov/compound/diflunisal
amylocaine	CMAP	https://pubchem.ncbi.nlm.nih.gov/compound/amylocaine
pheniramine	CMAP	https://pubchem.ncbi.nlm.nih.gov/compound/pheniramine
acebutolol	CMAP	https://pubchem.ncbi.nlm.nih.gov/compound/acebutolol
diphemanil metilsulfate	CMAP	https://pubchem.ncbi.nlm.nih.gov/compound/diphemanil metilsulfate
sulfaguanidine	CMAP	https://pubchem.ncbi.nlm.nih.gov/compound/sulfaguanidine
minoxidil	CMAP	https://pubchem.ncbi.nlm.nih.gov/compound/minoxidil
4-hydroxyphenazone	CMAP	https://pubchem.ncbi.nlm.nih.gov/compound/4-hydroxyphenazone
niclosamide	CMAP	https://pubchem.ncbi.nlm.nih.gov/compound/niclosamide
lidocaine	CMAP	https://pubchem.ncbi.nlm.nih.gov/compound/lidocaine
tolazoline	CMAP	https://pubchem.ncbi.nlm.nih.gov/compound/tolazoline
tolnaftate	CMAP	https://pubchem.ncbi.nlm.nih.gov/compound/tolnaftate
trimethobenzamide	CMAP	https://pubchem.ncbi.nlm.nih.gov/compound/trimethobenzamide
metronidazole	CMAP	https://pubchem.ncbi.nlm.nih.gov/compound/metronidazole
khellin	CMAP	https://pubchem.ncbi.nlm.nih.gov/compound/khellin
apomorphine	CMAP	https://pubchem.ncbi.nlm.nih.gov/compound/apomorphine
naloxone	CMAP	https://pubchem.ncbi.nlm.nih.gov/compound/naloxone
bromocriptine	CMAP	https://pubchem.ncbi.nlm.nih.gov/compound/bromocriptine
glipizide	CMAP	https://pubchem.ncbi.nlm.nih.gov/compound/glipizide
erythromycin	CMAP	https://pubchem.ncbi.nlm.nih.gov/compound/erythromycin
cotinine	CMAP	https://pubchem.ncbi.nlm.nih.gov/compound/cotinine
zimeldine	CMAP	https://pubchem.ncbi.nlm.nih.gov/compound/zimeldine
amoxapine	CMAP	https://pubchem.ncbi.nlm.nih.gov/compound/amoxapine
metolazone	CMAP	https://pubchem.ncbi.nlm.nih.gov/compound/metolazone
metanephrine	CMAP	https://pubchem.ncbi.nlm.nih.gov/compound/metanephrine
loxapine	CMAP	https://pubchem.ncbi.nlm.nih.gov/compound/loxapine
dipyridamole	CMAP	https://pubchem.ncbi.nlm.nih.gov/compound/dipyridamole
oleandomycin	CMAP	https://pubchem.ncbi.nlm.nih.gov/compound/oleandomycin
edrophonium chloride	CMAP	https://pubchem.ncbi.nlm.nih.gov/compound/edrophonium chloride
azacyclonol	CMAP	https://pubchem.ncbi.nlm.nih.gov/compound/azacyclonol
cyproheptadine	CMAP	https://pubchem.ncbi.nlm.nih.gov/compound/cyproheptadine
ciprofloxacin	CMAP	https://pubchem.ncbi.nlm.nih.gov/compound/ciprofloxacin
dehydrocholic acid	CMAP	https://pubchem.ncbi.nlm.nih.gov/compound/dehydrocholic acid
hydroxyzine	CMAP	https://pubchem.ncbi.nlm.nih.gov/compound/hydroxyzine
chlorhexidine	CMAP	https://pubchem.ncbi.nlm.nih.gov/compound/chlorhexidine
midecamycin	CMAP	https://pubchem.ncbi.nlm.nih.gov/compound/midecamycin
moroxydine	CMAP	https://pubchem.ncbi.nlm.nih.gov/compound/moroxydine
famotidine	CMAP	https://pubchem.ncbi.nlm.nih.gov/compound/famotidine
ampicillin	CMAP	https://pubchem.ncbi.nlm.nih.gov/compound/ampicillin
hesperetin	CMAP	https://pubchem.ncbi.nlm.nih.gov/compound/hesperetin
diltiazem	CMAP	https://pubchem.ncbi.nlm.nih.gov/compound/diltiazem
loperamide	CMAP	https://pubchem.ncbi.nlm.nih.gov/compound/loperamide
josamycin	CMAP	https://pubchem.ncbi.nlm.nih.gov/compound/josamycin
baclofen	CMAP	https://pubchem.ncbi.nlm.nih.gov/compound/baclofen
lynestrenol	CMAP	https://pubchem.ncbi.nlm.nih.gov/compound/lynestrenol
danazol	CMAP	https://pubchem.ncbi.nlm.nih.gov/compound/danazol
perphenazine	CMAP	https://pubchem.ncbi.nlm.nih.gov/compound/perphenazine
chlortetracycline	CMAP	https://pubchem.ncbi.nlm.nih.gov/compound/chlortetracycline
aciclovir	CMAP	https://pubchem.ncbi.nlm.nih.gov/compound/aciclovir
guanabenz	CMAP	https://pubchem.ncbi.nlm.nih.gov/compound/guanabenz
lisuride	CMAP	https://pubchem.ncbi.nlm.nih.gov/compound/lisuride
glibenclamide	CMAP	https://pubchem.ncbi.nlm.nih.gov/compound/glibenclamide
albendazole	CMAP	https://pubchem.ncbi.nlm.nih.gov/compound/albendazole
labetalol	CMAP	https://pubchem.ncbi.nlm.nih.gov/compound/labetalol
oxybutynin	CMAP	https://pubchem.ncbi.nlm.nih.gov/compound/oxybutynin
benzydamine	CMAP	https://pubchem.ncbi.nlm.nih.gov/compound/benzydamine
oxytetracycline	CMAP	https://pubchem.ncbi.nlm.nih.gov/compound/oxytetracycline
guanethidine	CMAP	https://pubchem.ncbi.nlm.nih.gov/compound/guanethidine
clonidine	CMAP	https://pubchem.ncbi.nlm.nih.gov/compound/clonidine
antazoline	CMAP	https://pubchem.ncbi.nlm.nih.gov/compound/antazoline
vinpocetine	CMAP	https://pubchem.ncbi.nlm.nih.gov/compound/vinpocetine
cinnarizine	CMAP	https://pubchem.ncbi.nlm.nih.gov/compound/cinnarizine
spiperone	CMAP	https://pubchem.ncbi.nlm.nih.gov/compound/spiperone
fipexide	CMAP	https://pubchem.ncbi.nlm.nih.gov/compound/fipexide
pimozide	CMAP	https://pubchem.ncbi.nlm.nih.gov/compound/pimozide
mepacrine	CMAP	https://pubchem.ncbi.nlm.nih.gov/compound/mepacrine
bupropion	CMAP	https://pubchem.ncbi.nlm.nih.gov/compound/bupropion
etacrynic acid	CMAP	https://pubchem.ncbi.nlm.nih.gov/compound/etacrynic acid
clomipramine	CMAP	https://pubchem.ncbi.nlm.nih.gov/compound/clomipramine
methylprednisolone	CMAP	https://pubchem.ncbi.nlm.nih.gov/compound/methylprednisolone
mepyramine	CMAP	https://pubchem.ncbi.nlm.nih.gov/compound/mepyramine
mifepristone	CMAP	https://pubchem.ncbi.nlm.nih.gov/compound/mifepristone
amodiaquine	CMAP	https://pubchem.ncbi.nlm.nih.gov/compound/amodiaquine
alprenolol	CMAP	https://pubchem.ncbi.nlm.nih.gov/compound/alprenolol
praziquantel	CMAP	https://pubchem.ncbi.nlm.nih.gov/compound/praziquantel
fendiline	CMAP	https://pubchem.ncbi.nlm.nih.gov/compound/fendiline
sulfinpyrazone	CMAP	https://pubchem.ncbi.nlm.nih.gov/compound/sulfinpyrazone
diperodon	CMAP	https://pubchem.ncbi.nlm.nih.gov/compound/diperodon
mebeverine	CMAP	https://pubchem.ncbi.nlm.nih.gov/compound/mebeverine
streptomycin	CMAP	https://pubchem.ncbi.nlm.nih.gov/compound/streptomycin
tremorine	CMAP	https://pubchem.ncbi.nlm.nih.gov/compound/tremorine
furosemide	CMAP	https://pubchem.ncbi.nlm.nih.gov/compound/furosemide
chlortalidone	CMAP	https://pubchem.ncbi.nlm.nih.gov/compound/chlortalidone
bambuterol	CMAP	https://pubchem.ncbi.nlm.nih.gov/compound/bambuterol
ketotifen	CMAP	https://pubchem.ncbi.nlm.nih.gov/compound/ketotifen
terbutaline	CMAP	https://pubchem.ncbi.nlm.nih.gov/compound/terbutaline
alfuzosin	CMAP	https://pubchem.ncbi.nlm.nih.gov/compound/alfuzosin
practolol	CMAP	https://pubchem.ncbi.nlm.nih.gov/compound/practolol
methapyrilene	CMAP	https://pubchem.ncbi.nlm.nih.gov/compound/methapyrilene
dobutamine	CMAP	https://pubchem.ncbi.nlm.nih.gov/compound/dobutamine
betamethasone	CMAP	https://pubchem.ncbi.nlm.nih.gov/compound/betamethasone
debrisoquine	CMAP	https://pubchem.ncbi.nlm.nih.gov/compound/debrisoquine
betaxolol	CMAP	https://pubchem.ncbi.nlm.nih.gov/compound/betaxolol
ketanserin	CMAP	https://pubchem.ncbi.nlm.nih.gov/compound/ketanserin
zidovudine	CMAP	https://pubchem.ncbi.nlm.nih.gov/compound/zidovudine
desipramine	CMAP	https://pubchem.ncbi.nlm.nih.gov/compound/desipramine
enoxacin	CMAP	https://pubchem.ncbi.nlm.nih.gov/compound/enoxacin
methotrexate	CMAP	https://pubchem.ncbi.nlm.nih.gov/compound/methotrexate
nicardipine	CMAP	https://pubchem.ncbi.nlm.nih.gov/compound/nicardipine
hemicholinium	CMAP	https://pubchem.ncbi.nlm.nih.gov/compound/hemicholinium
phenylpropanolamine	CMAP	https://pubchem.ncbi.nlm.nih.gov/compound/phenylpropanolamine
sulfafurazole	CMAP	https://pubchem.ncbi.nlm.nih.gov/compound/sulfafurazole
clorgiline	CMAP	https://pubchem.ncbi.nlm.nih.gov/compound/clorgiline
clopamide	CMAP	https://pubchem.ncbi.nlm.nih.gov/compound/clopamide
metergoline	CMAP	https://pubchem.ncbi.nlm.nih.gov/compound/metergoline
methylergometrine	CMAP	https://pubchem.ncbi.nlm.nih.gov/compound/methylergometrine
kanamycin	CMAP	https://pubchem.ncbi.nlm.nih.gov/compound/kanamycin
ascorbic acid	CMAP	https://pubchem.ncbi.nlm.nih.gov/compound/ascorbic acid
zaprinast	CMAP	https://pubchem.ncbi.nlm.nih.gov/compound/zaprinast
clenbuterol	CMAP	https://pubchem.ncbi.nlm.nih.gov/compound/clenbuterol
hycanthone	CMAP	https://pubchem.ncbi.nlm.nih.gov/compound/hycanthone
brinzolamide	CMAP	https://pubchem.ncbi.nlm.nih.gov/compound/brinzolamide
metitepine	CMAP	https://pubchem.ncbi.nlm.nih.gov/compound/metitepine
amikacin	CMAP	https://pubchem.ncbi.nlm.nih.gov/compound/amikacin
methyldopa	CMAP	https://pubchem.ncbi.nlm.nih.gov/compound/methyldopa
chlormezanone	CMAP	https://pubchem.ncbi.nlm.nih.gov/compound/chlormezanone
maprotiline	CMAP	https://pubchem.ncbi.nlm.nih.gov/compound/maprotiline
adenosine phosphate	CMAP	https://pubchem.ncbi.nlm.nih.gov/compound/adenosine phosphate
ambroxol	CMAP	https://pubchem.ncbi.nlm.nih.gov/compound/ambroxol
clofazimine	CMAP	https://pubchem.ncbi.nlm.nih.gov/compound/clofazimine
vanoxerine	CMAP	https://pubchem.ncbi.nlm.nih.gov/compound/vanoxerine
etoposide	CMAP	https://pubchem.ncbi.nlm.nih.gov/compound/etoposide
cefoperazone	CMAP	https://pubchem.ncbi.nlm.nih.gov/compound/cefoperazone
8-azaguanine	CMAP	https://pubchem.ncbi.nlm.nih.gov/compound/8-azaguanine
meticrane	CMAP	https://pubchem.ncbi.nlm.nih.gov/compound/meticrane
sulfaphenazole	CMAP	https://pubchem.ncbi.nlm.nih.gov/compound/sulfaphenazole
procaine	CMAP	https://pubchem.ncbi.nlm.nih.gov/compound/procaine
metrifonate	CMAP	https://pubchem.ncbi.nlm.nih.gov/compound/metrifonate
morantel	CMAP	https://pubchem.ncbi.nlm.nih.gov/compound/morantel
todralazine	CMAP	https://pubchem.ncbi.nlm.nih.gov/compound/todralazine
allantoin	CMAP	https://pubchem.ncbi.nlm.nih.gov/compound/allantoin
benzonatate	CMAP	https://pubchem.ncbi.nlm.nih.gov/compound/benzonatate
dexpanthenol	CMAP	https://pubchem.ncbi.nlm.nih.gov/compound/dexpanthenol
epirizole	CMAP	https://pubchem.ncbi.nlm.nih.gov/compound/epirizole
moxisylyte	CMAP	https://pubchem.ncbi.nlm.nih.gov/compound/moxisylyte
homatropine	CMAP	https://pubchem.ncbi.nlm.nih.gov/compound/homatropine
imipramine	CMAP	https://pubchem.ncbi.nlm.nih.gov/compound/imipramine
acetazolamide	CMAP	https://pubchem.ncbi.nlm.nih.gov/compound/acetazolamide
hydroflumethiazide	CMAP	https://pubchem.ncbi.nlm.nih.gov/compound/hydroflumethiazide
sulfadiazine	CMAP	https://pubchem.ncbi.nlm.nih.gov/compound/sulfadiazine
diprophylline	CMAP	https://pubchem.ncbi.nlm.nih.gov/compound/diprophylline
betazole	CMAP	https://pubchem.ncbi.nlm.nih.gov/compound/betazole
triflupromazine	CMAP	https://pubchem.ncbi.nlm.nih.gov/compound/triflupromazine
sulfacetamide	CMAP	https://pubchem.ncbi.nlm.nih.gov/compound/sulfacetamide
noretynodrel	CMAP	https://pubchem.ncbi.nlm.nih.gov/compound/noretynodrel
triamterene	CMAP	https://pubchem.ncbi.nlm.nih.gov/compound/triamterene
isoxicam	CMAP	https://pubchem.ncbi.nlm.nih.gov/compound/isoxicam
mefenamic acid	CMAP	https://pubchem.ncbi.nlm.nih.gov/compound/mefenamic acid
atracurium besilate	CMAP	https://pubchem.ncbi.nlm.nih.gov/compound/atracurium besilate
heptaminol	CMAP	https://pubchem.ncbi.nlm.nih.gov/compound/heptaminol
thiamphenicol	CMAP	https://pubchem.ncbi.nlm.nih.gov/compound/thiamphenicol
dapsone	CMAP	https://pubchem.ncbi.nlm.nih.gov/compound/dapsone
naproxen	CMAP	https://pubchem.ncbi.nlm.nih.gov/compound/naproxen
acetohexamide	CMAP	https://pubchem.ncbi.nlm.nih.gov/compound/acetohexamide
diphenhydramine	CMAP	https://pubchem.ncbi.nlm.nih.gov/compound/diphenhydramine
adiphenine	CMAP	https://pubchem.ncbi.nlm.nih.gov/compound/adiphenine
piracetam	CMAP	https://pubchem.ncbi.nlm.nih.gov/compound/piracetam
molsidomine	CMAP	https://pubchem.ncbi.nlm.nih.gov/compound/molsidomine
dirithromycin	CMAP	https://pubchem.ncbi.nlm.nih.gov/compound/dirithromycin
dosulepin	CMAP	https://pubchem.ncbi.nlm.nih.gov/compound/dosulepin
artemisinin	CMAP	https://pubchem.ncbi.nlm.nih.gov/compound/artemisinin
budesonide	CMAP	https://pubchem.ncbi.nlm.nih.gov/compound/budesonide
triflusal	CMAP	https://pubchem.ncbi.nlm.nih.gov/compound/triflusal
phenindione	CMAP	https://pubchem.ncbi.nlm.nih.gov/compound/phenindione
chloroquine	CMAP	https://pubchem.ncbi.nlm.nih.gov/compound/chloroquine
gliclazide	CMAP	https://pubchem.ncbi.nlm.nih.gov/compound/gliclazide
ceftazidime	CMAP	https://pubchem.ncbi.nlm.nih.gov/compound/ceftazidime
propafenone	CMAP	https://pubchem.ncbi.nlm.nih.gov/compound/propafenone
bromperidol	CMAP	https://pubchem.ncbi.nlm.nih.gov/compound/bromperidol
imipenem	CMAP	https://pubchem.ncbi.nlm.nih.gov/compound/imipenem
mesoridazine	CMAP	https://pubchem.ncbi.nlm.nih.gov/compound/mesoridazine
thiocolchicoside	CMAP	https://pubchem.ncbi.nlm.nih.gov/compound/thiocolchicoside
trimetazidine	CMAP	https://pubchem.ncbi.nlm.nih.gov/compound/trimetazidine
Prestwick-559	CMAP	https://pubchem.ncbi.nlm.nih.gov/compound/Prestwick-559
iobenguane	CMAP	https://pubchem.ncbi.nlm.nih.gov/compound/iobenguane
etamivan	CMAP	https://pubchem.ncbi.nlm.nih.gov/compound/etamivan
cyclizine	CMAP	https://pubchem.ncbi.nlm.nih.gov/compound/cyclizine
Trolox C	CMAP	https://pubchem.ncbi.nlm.nih.gov/compound/Trolox C
clorsulon	CMAP	https://pubchem.ncbi.nlm.nih.gov/compound/clorsulon
parthenolide	CMAP	https://pubchem.ncbi.nlm.nih.gov/compound/parthenolide
prenylamine	CMAP	https://pubchem.ncbi.nlm.nih.gov/compound/prenylamine
tubocurarine chloride	CMAP	https://pubchem.ncbi.nlm.nih.gov/compound/tubocurarine chloride
tetracaine	CMAP	https://pubchem.ncbi.nlm.nih.gov/compound/tetracaine
hydrastine hydrochloride	CMAP	https://pubchem.ncbi.nlm.nih.gov/compound/hydrastine hydrochloride
laudanosine	CMAP	https://pubchem.ncbi.nlm.nih.gov/compound/laudanosine
scoulerine	CMAP	https://pubchem.ncbi.nlm.nih.gov/compound/scoulerine
10-methoxyharmalan	CMAP	https://pubchem.ncbi.nlm.nih.gov/compound/10-methoxyharmalan
thiamine	CMAP	https://pubchem.ncbi.nlm.nih.gov/compound/thiamine
dihydroergocristine	CMAP	https://pubchem.ncbi.nlm.nih.gov/compound/dihydroergocristine
mometasone	CMAP	https://pubchem.ncbi.nlm.nih.gov/compound/mometasone
lobelanidine	CMAP	https://pubchem.ncbi.nlm.nih.gov/compound/lobelanidine
raubasine	CMAP	https://pubchem.ncbi.nlm.nih.gov/compound/raubasine
ajmaline	CMAP	https://pubchem.ncbi.nlm.nih.gov/compound/ajmaline
harmol	CMAP	https://pubchem.ncbi.nlm.nih.gov/compound/harmol
stachydrine	CMAP	https://pubchem.ncbi.nlm.nih.gov/compound/stachydrine
dipivefrine	CMAP	https://pubchem.ncbi.nlm.nih.gov/compound/dipivefrine
noscapine	CMAP	https://pubchem.ncbi.nlm.nih.gov/compound/noscapine
tomatidine	CMAP	https://pubchem.ncbi.nlm.nih.gov/compound/tomatidine
papaverine	CMAP	https://pubchem.ncbi.nlm.nih.gov/compound/papaverine
tetrahydroalstonine	CMAP	https://pubchem.ncbi.nlm.nih.gov/compound/tetrahydroalstonine
monocrotaline	CMAP	https://pubchem.ncbi.nlm.nih.gov/compound/monocrotaline
harmine	CMAP	https://pubchem.ncbi.nlm.nih.gov/compound/harmine
pyridoxine	CMAP	https://pubchem.ncbi.nlm.nih.gov/compound/pyridoxine
syrosingopine	CMAP	https://pubchem.ncbi.nlm.nih.gov/compound/syrosingopine
dacarbazine	CMAP	https://pubchem.ncbi.nlm.nih.gov/compound/dacarbazine
piperlongumine	CMAP	https://pubchem.ncbi.nlm.nih.gov/compound/piperlongumine
ellipticine	CMAP	https://pubchem.ncbi.nlm.nih.gov/compound/ellipticine
cytisine	CMAP	https://pubchem.ncbi.nlm.nih.gov/compound/cytisine
riboflavin	CMAP	https://pubchem.ncbi.nlm.nih.gov/compound/riboflavin
atropine	CMAP	https://pubchem.ncbi.nlm.nih.gov/compound/atropine
ipratropium bromide	CMAP	https://pubchem.ncbi.nlm.nih.gov/compound/ipratropium bromide
lobeline	CMAP	https://pubchem.ncbi.nlm.nih.gov/compound/lobeline
calycanthine	CMAP	https://pubchem.ncbi.nlm.nih.gov/compound/calycanthine
hydrocotarnine	CMAP	https://pubchem.ncbi.nlm.nih.gov/compound/hydrocotarnine
1,4-chrysenequinone	CMAP	https://pubchem.ncbi.nlm.nih.gov/compound/1,4-chrysenequinone
pseudopelletierine	CMAP	https://pubchem.ncbi.nlm.nih.gov/compound/pseudopelletierine
hydroquinine	CMAP	https://pubchem.ncbi.nlm.nih.gov/compound/hydroquinine
physostigmine	CMAP	https://pubchem.ncbi.nlm.nih.gov/compound/physostigmine
acepromazine	CMAP	https://pubchem.ncbi.nlm.nih.gov/compound/acepromazine
berberine	CMAP	https://pubchem.ncbi.nlm.nih.gov/compound/berberine
convolamine	CMAP	https://pubchem.ncbi.nlm.nih.gov/compound/convolamine
cinchonidine	CMAP	https://pubchem.ncbi.nlm.nih.gov/compound/cinchonidine
demecarium bromide	CMAP	https://pubchem.ncbi.nlm.nih.gov/compound/demecarium bromide
racecadotril	CMAP	https://pubchem.ncbi.nlm.nih.gov/compound/racecadotril
epivincamine	CMAP	https://pubchem.ncbi.nlm.nih.gov/compound/epivincamine
aconitine	CMAP	https://pubchem.ncbi.nlm.nih.gov/compound/aconitine
(+)-chelidonine	CMAP	https://pubchem.ncbi.nlm.nih.gov/compound/(+)-chelidonine
isocorydine	CMAP	https://pubchem.ncbi.nlm.nih.gov/compound/isocorydine
vinburnine	CMAP	https://pubchem.ncbi.nlm.nih.gov/compound/vinburnine
quipazine	CMAP	https://pubchem.ncbi.nlm.nih.gov/compound/quipazine
folic acid	CMAP	https://pubchem.ncbi.nlm.nih.gov/compound/folic acid
chloramphenicol	CMAP	https://pubchem.ncbi.nlm.nih.gov/compound/chloramphenicol
isoflupredone	CMAP	https://pubchem.ncbi.nlm.nih.gov/compound/isoflupredone
canrenoic acid	CMAP	https://pubchem.ncbi.nlm.nih.gov/compound/canrenoic acid
ursolic acid	CMAP	https://pubchem.ncbi.nlm.nih.gov/compound/ursolic acid
gentamicin	CMAP	https://pubchem.ncbi.nlm.nih.gov/compound/gentamicin
methocarbamol	CMAP	https://pubchem.ncbi.nlm.nih.gov/compound/methocarbamol
aceclofenac	CMAP	https://pubchem.ncbi.nlm.nih.gov/compound/aceclofenac
retrorsine	CMAP	https://pubchem.ncbi.nlm.nih.gov/compound/retrorsine
rescinnamine	CMAP	https://pubchem.ncbi.nlm.nih.gov/compound/rescinnamine
galantamine	CMAP	https://pubchem.ncbi.nlm.nih.gov/compound/galantamine
xylazine	CMAP	https://pubchem.ncbi.nlm.nih.gov/compound/xylazine
cinchonine	CMAP	https://pubchem.ncbi.nlm.nih.gov/compound/cinchonine
sparteine	CMAP	https://pubchem.ncbi.nlm.nih.gov/compound/sparteine
conessine	CMAP	https://pubchem.ncbi.nlm.nih.gov/compound/conessine
co-dergocrine mesilate	CMAP	https://pubchem.ncbi.nlm.nih.gov/compound/co-dergocrine mesilate
palmatine	CMAP	https://pubchem.ncbi.nlm.nih.gov/compound/palmatine
bicuculline	CMAP	https://pubchem.ncbi.nlm.nih.gov/compound/bicuculline
seneciphylline	CMAP	https://pubchem.ncbi.nlm.nih.gov/compound/seneciphylline
canavanine	CMAP	https://pubchem.ncbi.nlm.nih.gov/compound/canavanine
diflorasone	CMAP	https://pubchem.ncbi.nlm.nih.gov/compound/diflorasone
gramine	CMAP	https://pubchem.ncbi.nlm.nih.gov/compound/gramine
protoveratrine A	CMAP	https://pubchem.ncbi.nlm.nih.gov/compound/protoveratrine A
emetine	CMAP	https://pubchem.ncbi.nlm.nih.gov/compound/emetine
trimethylcolchicinic acid	CMAP	https://pubchem.ncbi.nlm.nih.gov/compound/trimethylcolchicinic acid
yohimbic acid	CMAP	https://pubchem.ncbi.nlm.nih.gov/compound/yohimbic acid
boldine	CMAP	https://pubchem.ncbi.nlm.nih.gov/compound/boldine
harmaline	CMAP	https://pubchem.ncbi.nlm.nih.gov/compound/harmaline
harman	CMAP	https://pubchem.ncbi.nlm.nih.gov/compound/harman
quinisocaine	CMAP	https://pubchem.ncbi.nlm.nih.gov/compound/quinisocaine
solanine	CMAP	https://pubchem.ncbi.nlm.nih.gov/compound/solanine
sulmazole	CMAP	https://pubchem.ncbi.nlm.nih.gov/compound/sulmazole
glimepiride	CMAP	https://pubchem.ncbi.nlm.nih.gov/compound/glimepiride
vitexin	CMAP	https://pubchem.ncbi.nlm.nih.gov/compound/vitexin
dydrogesterone	CMAP	https://pubchem.ncbi.nlm.nih.gov/compound/dydrogesterone
hydroxyachillin	CMAP	https://pubchem.ncbi.nlm.nih.gov/compound/hydroxyachillin
trihexyphenidyl	CMAP	https://pubchem.ncbi.nlm.nih.gov/compound/trihexyphenidyl
sulfabenzamide	CMAP	https://pubchem.ncbi.nlm.nih.gov/compound/sulfabenzamide
Prestwick-642	CMAP	https://pubchem.ncbi.nlm.nih.gov/compound/Prestwick-642
picrotoxinin	CMAP	https://pubchem.ncbi.nlm.nih.gov/compound/picrotoxinin
gelsemine	CMAP	https://pubchem.ncbi.nlm.nih.gov/compound/gelsemine
canadine	CMAP	https://pubchem.ncbi.nlm.nih.gov/compound/canadine
Prestwick-682	CMAP	https://pubchem.ncbi.nlm.nih.gov/compound/Prestwick-682
Prestwick-692	CMAP	https://pubchem.ncbi.nlm.nih.gov/compound/Prestwick-692
succinylsulfathiazole	CMAP	https://pubchem.ncbi.nlm.nih.gov/compound/succinylsulfathiazole
benzocaine	CMAP	https://pubchem.ncbi.nlm.nih.gov/compound/benzocaine
flunisolide	CMAP	https://pubchem.ncbi.nlm.nih.gov/compound/flunisolide
mepenzolate bromide	CMAP	https://pubchem.ncbi.nlm.nih.gov/compound/mepenzolate bromide
solasodine	CMAP	https://pubchem.ncbi.nlm.nih.gov/compound/solasodine
eldeline	CMAP	https://pubchem.ncbi.nlm.nih.gov/compound/eldeline
pempidine	CMAP	https://pubchem.ncbi.nlm.nih.gov/compound/pempidine
promazine	CMAP	https://pubchem.ncbi.nlm.nih.gov/compound/promazine
famprofazone	CMAP	https://pubchem.ncbi.nlm.nih.gov/compound/famprofazone
metamizole sodium	CMAP	https://pubchem.ncbi.nlm.nih.gov/compound/metamizole sodium
citiolone	CMAP	https://pubchem.ncbi.nlm.nih.gov/compound/citiolone
benfotiamine	CMAP	https://pubchem.ncbi.nlm.nih.gov/compound/benfotiamine
Prestwick-664	CMAP	https://pubchem.ncbi.nlm.nih.gov/compound/Prestwick-664
Prestwick-674	CMAP	https://pubchem.ncbi.nlm.nih.gov/compound/Prestwick-674
heliotrine	CMAP	https://pubchem.ncbi.nlm.nih.gov/compound/heliotrine
sulfamerazine	CMAP	https://pubchem.ncbi.nlm.nih.gov/compound/sulfamerazine
bromopride	CMAP	https://pubchem.ncbi.nlm.nih.gov/compound/bromopride
isosorbide	CMAP	https://pubchem.ncbi.nlm.nih.gov/compound/isosorbide
fludroxycortide	CMAP	https://pubchem.ncbi.nlm.nih.gov/compound/fludroxycortide
halcinonide	CMAP	https://pubchem.ncbi.nlm.nih.gov/compound/halcinonide
Prestwick-665	CMAP	https://pubchem.ncbi.nlm.nih.gov/compound/Prestwick-665
Prestwick-675	CMAP	https://pubchem.ncbi.nlm.nih.gov/compound/Prestwick-675
Prestwick-685	CMAP	https://pubchem.ncbi.nlm.nih.gov/compound/Prestwick-685
acacetin	CMAP	https://pubchem.ncbi.nlm.nih.gov/compound/acacetin
methylbenzethonium chloride	CMAP	https://pubchem.ncbi.nlm.nih.gov/compound/methylbenzethonium chloride
sulfachlorpyridazine	CMAP	https://pubchem.ncbi.nlm.nih.gov/compound/sulfachlorpyridazine
helveticoside	CMAP	https://pubchem.ncbi.nlm.nih.gov/compound/helveticoside
lanatoside C	CMAP	https://pubchem.ncbi.nlm.nih.gov/compound/lanatoside C
beta-escin	CMAP	https://pubchem.ncbi.nlm.nih.gov/compound/beta-escin
lycorine	CMAP	https://pubchem.ncbi.nlm.nih.gov/compound/lycorine
ethotoin	CMAP	https://pubchem.ncbi.nlm.nih.gov/compound/ethotoin
chlorcyclizine	CMAP	https://pubchem.ncbi.nlm.nih.gov/compound/chlorcyclizine
pramocaine	CMAP	https://pubchem.ncbi.nlm.nih.gov/compound/pramocaine
myosmine	CMAP	https://pubchem.ncbi.nlm.nih.gov/compound/myosmine
benzamil	CMAP	https://pubchem.ncbi.nlm.nih.gov/compound/benzamil
foliosidine	CMAP	https://pubchem.ncbi.nlm.nih.gov/compound/foliosidine
gossypol	CMAP	https://pubchem.ncbi.nlm.nih.gov/compound/gossypol
karakoline	CMAP	https://pubchem.ncbi.nlm.nih.gov/compound/karakoline
etiocholanolone	CMAP	https://pubchem.ncbi.nlm.nih.gov/compound/etiocholanolone
diphenylpyraline	CMAP	https://pubchem.ncbi.nlm.nih.gov/compound/diphenylpyraline
finasteride	CMAP	https://pubchem.ncbi.nlm.nih.gov/compound/finasteride
betonicine	CMAP	https://pubchem.ncbi.nlm.nih.gov/compound/betonicine
tiapride	CMAP	https://pubchem.ncbi.nlm.nih.gov/compound/tiapride
griseofulvin	CMAP	https://pubchem.ncbi.nlm.nih.gov/compound/griseofulvin
dilazep	CMAP	https://pubchem.ncbi.nlm.nih.gov/compound/dilazep
riluzole	CMAP	https://pubchem.ncbi.nlm.nih.gov/compound/riluzole
sulfamethoxazole	CMAP	https://pubchem.ncbi.nlm.nih.gov/compound/sulfamethoxazole
nalidixic acid	CMAP	https://pubchem.ncbi.nlm.nih.gov/compound/nalidixic acid
metaraminol	CMAP	https://pubchem.ncbi.nlm.nih.gov/compound/metaraminol
kawain	CMAP	https://pubchem.ncbi.nlm.nih.gov/compound/kawain
mebendazole	CMAP	https://pubchem.ncbi.nlm.nih.gov/compound/mebendazole
clemizole	CMAP	https://pubchem.ncbi.nlm.nih.gov/compound/clemizole
ofloxacin	CMAP	https://pubchem.ncbi.nlm.nih.gov/compound/ofloxacin
nitrofurantoin	CMAP	https://pubchem.ncbi.nlm.nih.gov/compound/nitrofurantoin
mephenesin	CMAP	https://pubchem.ncbi.nlm.nih.gov/compound/mephenesin
pentolonium	CMAP	https://pubchem.ncbi.nlm.nih.gov/compound/pentolonium
salbutamol	CMAP	https://pubchem.ncbi.nlm.nih.gov/compound/salbutamol
trimethoprim	CMAP	https://pubchem.ncbi.nlm.nih.gov/compound/trimethoprim
fenbufen	CMAP	https://pubchem.ncbi.nlm.nih.gov/compound/fenbufen
tropicamide	CMAP	https://pubchem.ncbi.nlm.nih.gov/compound/tropicamide
lomefloxacin	CMAP	https://pubchem.ncbi.nlm.nih.gov/compound/lomefloxacin
hydralazine	CMAP	https://pubchem.ncbi.nlm.nih.gov/compound/hydralazine
6-benzylaminopurine	CMAP	https://pubchem.ncbi.nlm.nih.gov/compound/6-benzylaminopurine
prilocaine	CMAP	https://pubchem.ncbi.nlm.nih.gov/compound/prilocaine
metoclopramide	CMAP	https://pubchem.ncbi.nlm.nih.gov/compound/metoclopramide
ketoprofen	CMAP	https://pubchem.ncbi.nlm.nih.gov/compound/ketoprofen
nefopam	CMAP	https://pubchem.ncbi.nlm.nih.gov/compound/nefopam
orphenadrine	CMAP	https://pubchem.ncbi.nlm.nih.gov/compound/orphenadrine
phenelzine	CMAP	https://pubchem.ncbi.nlm.nih.gov/compound/phenelzine
camptothecin	CMAP	https://pubchem.ncbi.nlm.nih.gov/compound/camptothecin
indapamide	CMAP	https://pubchem.ncbi.nlm.nih.gov/compound/indapamide
mexiletine	CMAP	https://pubchem.ncbi.nlm.nih.gov/compound/mexiletine
ethisterone	CMAP	https://pubchem.ncbi.nlm.nih.gov/compound/ethisterone
vincamine	CMAP	https://pubchem.ncbi.nlm.nih.gov/compound/vincamine
dantrolene	CMAP	https://pubchem.ncbi.nlm.nih.gov/compound/dantrolene
flutamide	CMAP	https://pubchem.ncbi.nlm.nih.gov/compound/flutamide
fenbendazole	CMAP	https://pubchem.ncbi.nlm.nih.gov/compound/fenbendazole
proglumide	CMAP	https://pubchem.ncbi.nlm.nih.gov/compound/proglumide
lisinopril	CMAP	https://pubchem.ncbi.nlm.nih.gov/compound/lisinopril
ifenprodil	CMAP	https://pubchem.ncbi.nlm.nih.gov/compound/ifenprodil
flavoxate	CMAP	https://pubchem.ncbi.nlm.nih.gov/compound/flavoxate
difenidol	CMAP	https://pubchem.ncbi.nlm.nih.gov/compound/difenidol
triprolidine	CMAP	https://pubchem.ncbi.nlm.nih.gov/compound/triprolidine
fenoterol	CMAP	https://pubchem.ncbi.nlm.nih.gov/compound/fenoterol
trazodone	CMAP	https://pubchem.ncbi.nlm.nih.gov/compound/trazodone
lincomycin	CMAP	https://pubchem.ncbi.nlm.nih.gov/compound/lincomycin
flunarizine	CMAP	https://pubchem.ncbi.nlm.nih.gov/compound/flunarizine
bufexamac	CMAP	https://pubchem.ncbi.nlm.nih.gov/compound/bufexamac
norethisterone	CMAP	https://pubchem.ncbi.nlm.nih.gov/compound/norethisterone
doxepin	CMAP	https://pubchem.ncbi.nlm.nih.gov/compound/doxepin
cortisone	CMAP	https://pubchem.ncbi.nlm.nih.gov/compound/cortisone
homochlorcyclizine	CMAP	https://pubchem.ncbi.nlm.nih.gov/compound/homochlorcyclizine
glafenine	CMAP	https://pubchem.ncbi.nlm.nih.gov/compound/glafenine
telenzepine	CMAP	https://pubchem.ncbi.nlm.nih.gov/compound/telenzepine
aminoglutethimide	CMAP	https://pubchem.ncbi.nlm.nih.gov/compound/aminoglutethimide
nortriptyline	CMAP	https://pubchem.ncbi.nlm.nih.gov/compound/nortriptyline
dyclonine	CMAP	https://pubchem.ncbi.nlm.nih.gov/compound/dyclonine
diethylcarbamazine	CMAP	https://pubchem.ncbi.nlm.nih.gov/compound/diethylcarbamazine
pimethixene	CMAP	https://pubchem.ncbi.nlm.nih.gov/compound/pimethixene
econazole	CMAP	https://pubchem.ncbi.nlm.nih.gov/compound/econazole
enalapril	CMAP	https://pubchem.ncbi.nlm.nih.gov/compound/enalapril
dropropizine	CMAP	https://pubchem.ncbi.nlm.nih.gov/compound/dropropizine
niflumic acid	CMAP	https://pubchem.ncbi.nlm.nih.gov/compound/niflumic acid
dimenhydrinate	CMAP	https://pubchem.ncbi.nlm.nih.gov/compound/dimenhydrinate
fenofibrate	CMAP	https://pubchem.ncbi.nlm.nih.gov/compound/fenofibrate
chenodeoxycholic acid	CMAP	https://pubchem.ncbi.nlm.nih.gov/compound/chenodeoxycholic acid
pergolide	CMAP	https://pubchem.ncbi.nlm.nih.gov/compound/pergolide
bupivacaine	CMAP	https://pubchem.ncbi.nlm.nih.gov/compound/bupivacaine
pinacidil	CMAP	https://pubchem.ncbi.nlm.nih.gov/compound/pinacidil
isotretinoin	CMAP	https://pubchem.ncbi.nlm.nih.gov/compound/isotretinoin
disopyramide	CMAP	https://pubchem.ncbi.nlm.nih.gov/compound/disopyramide
bumetanide	CMAP	https://pubchem.ncbi.nlm.nih.gov/compound/bumetanide
perhexiline	CMAP	https://pubchem.ncbi.nlm.nih.gov/compound/perhexiline
acemetacin	CMAP	https://pubchem.ncbi.nlm.nih.gov/compound/acemetacin
clemastine	CMAP	https://pubchem.ncbi.nlm.nih.gov/compound/clemastine
digoxin	CMAP	https://pubchem.ncbi.nlm.nih.gov/compound/digoxin
meclozine	CMAP	https://pubchem.ncbi.nlm.nih.gov/compound/meclozine
naringin	CMAP	https://pubchem.ncbi.nlm.nih.gov/compound/naringin
progesterone	CMAP	https://pubchem.ncbi.nlm.nih.gov/compound/progesterone
butoconazole	CMAP	https://pubchem.ncbi.nlm.nih.gov/compound/butoconazole
biotin	CMAP	https://pubchem.ncbi.nlm.nih.gov/compound/biotin
cephaeline	CMAP	https://pubchem.ncbi.nlm.nih.gov/compound/cephaeline
velnacrine	CMAP	https://pubchem.ncbi.nlm.nih.gov/compound/velnacrine
melatonin	CMAP	https://pubchem.ncbi.nlm.nih.gov/compound/melatonin
neostigmine bromide	CMAP	https://pubchem.ncbi.nlm.nih.gov/compound/neostigmine bromide
amiodarone	CMAP	https://pubchem.ncbi.nlm.nih.gov/compound/amiodarone
bisacodyl	CMAP	https://pubchem.ncbi.nlm.nih.gov/compound/bisacodyl
colecalciferol	CMAP	https://pubchem.ncbi.nlm.nih.gov/compound/colecalciferol
carbimazole	CMAP	https://pubchem.ncbi.nlm.nih.gov/compound/carbimazole
pilocarpine	CMAP	https://pubchem.ncbi.nlm.nih.gov/compound/pilocarpine
menadione	CMAP	https://pubchem.ncbi.nlm.nih.gov/compound/menadione
niridazole	CMAP	https://pubchem.ncbi.nlm.nih.gov/compound/niridazole
amphotericin B	CMAP	https://pubchem.ncbi.nlm.nih.gov/compound/amphotericin B
ergocalciferol	CMAP	https://pubchem.ncbi.nlm.nih.gov/compound/ergocalciferol
cisapride	CMAP	https://pubchem.ncbi.nlm.nih.gov/compound/cisapride
epiandrosterone	CMAP	https://pubchem.ncbi.nlm.nih.gov/compound/epiandrosterone
dicloxacillin	CMAP	https://pubchem.ncbi.nlm.nih.gov/compound/dicloxacillin
dinoprost	CMAP	https://pubchem.ncbi.nlm.nih.gov/compound/dinoprost
ceforanide	CMAP	https://pubchem.ncbi.nlm.nih.gov/compound/ceforanide
puromycin	CMAP	https://pubchem.ncbi.nlm.nih.gov/compound/puromycin
serotonin	CMAP	https://pubchem.ncbi.nlm.nih.gov/compound/serotonin
metixene	CMAP	https://pubchem.ncbi.nlm.nih.gov/compound/metixene
vigabatrin	CMAP	https://pubchem.ncbi.nlm.nih.gov/compound/vigabatrin
fluoxetine	CMAP	https://pubchem.ncbi.nlm.nih.gov/compound/fluoxetine
glycocholic acid	CMAP	https://pubchem.ncbi.nlm.nih.gov/compound/glycocholic acid
pirenperone	CMAP	https://pubchem.ncbi.nlm.nih.gov/compound/pirenperone
ciclopirox	CMAP	https://pubchem.ncbi.nlm.nih.gov/compound/ciclopirox
hexetidine	CMAP	https://pubchem.ncbi.nlm.nih.gov/compound/hexetidine
cefotiam	CMAP	https://pubchem.ncbi.nlm.nih.gov/compound/cefotiam
nitrofural	CMAP	https://pubchem.ncbi.nlm.nih.gov/compound/nitrofural
biperiden	CMAP	https://pubchem.ncbi.nlm.nih.gov/compound/biperiden
iohexol	CMAP	https://pubchem.ncbi.nlm.nih.gov/compound/iohexol
thiostrepton	CMAP	https://pubchem.ncbi.nlm.nih.gov/compound/thiostrepton
salsolidin	CMAP	https://pubchem.ncbi.nlm.nih.gov/compound/salsolidin
probenecid	CMAP	https://pubchem.ncbi.nlm.nih.gov/compound/probenecid
selegiline	CMAP	https://pubchem.ncbi.nlm.nih.gov/compound/selegiline
6-azathymine	CMAP	https://pubchem.ncbi.nlm.nih.gov/compound/6-azathymine
omeprazole	CMAP	https://pubchem.ncbi.nlm.nih.gov/compound/omeprazole
cetirizine	CMAP	https://pubchem.ncbi.nlm.nih.gov/compound/cetirizine
norcyclobenzaprine	CMAP	https://pubchem.ncbi.nlm.nih.gov/compound/norcyclobenzaprine
L-methionine sulfoximine	CMAP	https://pubchem.ncbi.nlm.nih.gov/compound/L-methionine sulfoximine
phenacetin	CMAP	https://pubchem.ncbi.nlm.nih.gov/compound/phenacetin
betahistine	CMAP	https://pubchem.ncbi.nlm.nih.gov/compound/betahistine
benperidol	CMAP	https://pubchem.ncbi.nlm.nih.gov/compound/benperidol
propylthiouracil	CMAP	https://pubchem.ncbi.nlm.nih.gov/compound/propylthiouracil
etifenin	CMAP	https://pubchem.ncbi.nlm.nih.gov/compound/etifenin
pyrazinamide	CMAP	https://pubchem.ncbi.nlm.nih.gov/compound/pyrazinamide
tiabendazole	CMAP	https://pubchem.ncbi.nlm.nih.gov/compound/tiabendazole
atovaquone	CMAP	https://pubchem.ncbi.nlm.nih.gov/compound/atovaquone
tobramycin	CMAP	https://pubchem.ncbi.nlm.nih.gov/compound/tobramycin
tolazamide	CMAP	https://pubchem.ncbi.nlm.nih.gov/compound/tolazamide
cefaclor	CMAP	https://pubchem.ncbi.nlm.nih.gov/compound/cefaclor
terconazole	CMAP	https://pubchem.ncbi.nlm.nih.gov/compound/terconazole
orciprenaline	CMAP	https://pubchem.ncbi.nlm.nih.gov/compound/orciprenaline
trimethadione	CMAP	https://pubchem.ncbi.nlm.nih.gov/compound/trimethadione
rifampicin	CMAP	https://pubchem.ncbi.nlm.nih.gov/compound/rifampicin
methoxamine	CMAP	https://pubchem.ncbi.nlm.nih.gov/compound/methoxamine
tetramisole	CMAP	https://pubchem.ncbi.nlm.nih.gov/compound/tetramisole
nifuroxazide	CMAP	https://pubchem.ncbi.nlm.nih.gov/compound/nifuroxazide
colistin	CMAP	https://pubchem.ncbi.nlm.nih.gov/compound/colistin
tiaprofenic acid	CMAP	https://pubchem.ncbi.nlm.nih.gov/compound/tiaprofenic acid
sisomicin	CMAP	https://pubchem.ncbi.nlm.nih.gov/compound/sisomicin
lovastatin	CMAP	https://pubchem.ncbi.nlm.nih.gov/compound/lovastatin
ethionamide	CMAP	https://pubchem.ncbi.nlm.nih.gov/compound/ethionamide
R-atenolol	CMAP	https://pubchem.ncbi.nlm.nih.gov/compound/R-atenolol
pregnenolone	CMAP	https://pubchem.ncbi.nlm.nih.gov/compound/pregnenolone
vancomycin	CMAP	https://pubchem.ncbi.nlm.nih.gov/compound/vancomycin
nystatin	CMAP	https://pubchem.ncbi.nlm.nih.gov/compound/nystatin
tenoxicam	CMAP	https://pubchem.ncbi.nlm.nih.gov/compound/tenoxicam
suxibuzone	CMAP	https://pubchem.ncbi.nlm.nih.gov/compound/suxibuzone
skimmianine	CMAP	https://pubchem.ncbi.nlm.nih.gov/compound/skimmianine
ricinine	CMAP	https://pubchem.ncbi.nlm.nih.gov/compound/ricinine
estropipate	CMAP	https://pubchem.ncbi.nlm.nih.gov/compound/estropipate
tetryzoline	CMAP	https://pubchem.ncbi.nlm.nih.gov/compound/tetryzoline
benzethonium chloride	CMAP	https://pubchem.ncbi.nlm.nih.gov/compound/benzethonium chloride
fluorometholone	CMAP	https://pubchem.ncbi.nlm.nih.gov/compound/fluorometholone
etanidazole	CMAP	https://pubchem.ncbi.nlm.nih.gov/compound/etanidazole
kinetin	CMAP	https://pubchem.ncbi.nlm.nih.gov/compound/kinetin
anabasine	CMAP	https://pubchem.ncbi.nlm.nih.gov/compound/anabasine
delsoline	CMAP	https://pubchem.ncbi.nlm.nih.gov/compound/delsoline
Prestwick-689	CMAP	https://pubchem.ncbi.nlm.nih.gov/compound/Prestwick-689
hexestrol	CMAP	https://pubchem.ncbi.nlm.nih.gov/compound/hexestrol
trioxysalen	CMAP	https://pubchem.ncbi.nlm.nih.gov/compound/trioxysalen
cefalotin	CMAP	https://pubchem.ncbi.nlm.nih.gov/compound/cefalotin
abamectin	CMAP	https://pubchem.ncbi.nlm.nih.gov/compound/abamectin
tetrandrine	CMAP	https://pubchem.ncbi.nlm.nih.gov/compound/tetrandrine
fluorocurarine	CMAP	https://pubchem.ncbi.nlm.nih.gov/compound/fluorocurarine
napelline	CMAP	https://pubchem.ncbi.nlm.nih.gov/compound/napelline
cefmetazole	CMAP	https://pubchem.ncbi.nlm.nih.gov/compound/cefmetazole
strophanthidin	CMAP	https://pubchem.ncbi.nlm.nih.gov/compound/strophanthidin
cefuroxime	CMAP	https://pubchem.ncbi.nlm.nih.gov/compound/cefuroxime
altizide	CMAP	https://pubchem.ncbi.nlm.nih.gov/compound/altizide
sulfaquinoxaline	CMAP	https://pubchem.ncbi.nlm.nih.gov/compound/sulfaquinoxaline
nadide	CMAP	https://pubchem.ncbi.nlm.nih.gov/compound/nadide
terazosin	CMAP	https://pubchem.ncbi.nlm.nih.gov/compound/terazosin
butamben	CMAP	https://pubchem.ncbi.nlm.nih.gov/compound/butamben
alclometasone	CMAP	https://pubchem.ncbi.nlm.nih.gov/compound/alclometasone
ramifenazone	CMAP	https://pubchem.ncbi.nlm.nih.gov/compound/ramifenazone
streptozocin	CMAP	https://pubchem.ncbi.nlm.nih.gov/compound/streptozocin
sulfamethizole	CMAP	https://pubchem.ncbi.nlm.nih.gov/compound/sulfamethizole
phenazopyridine	CMAP	https://pubchem.ncbi.nlm.nih.gov/compound/phenazopyridine
sulfapyridine	CMAP	https://pubchem.ncbi.nlm.nih.gov/compound/sulfapyridine
leflunomide	CMAP	https://pubchem.ncbi.nlm.nih.gov/compound/leflunomide
podophyllotoxin	CMAP	https://pubchem.ncbi.nlm.nih.gov/compound/podophyllotoxin
propidium iodide	CMAP	https://pubchem.ncbi.nlm.nih.gov/compound/propidium iodide
pheneticillin	CMAP	https://pubchem.ncbi.nlm.nih.gov/compound/pheneticillin
metoprolol	CMAP	https://pubchem.ncbi.nlm.nih.gov/compound/metoprolol
medrysone	CMAP	https://pubchem.ncbi.nlm.nih.gov/compound/medrysone
demeclocycline	CMAP	https://pubchem.ncbi.nlm.nih.gov/compound/demeclocycline
meclofenoxate	CMAP	https://pubchem.ncbi.nlm.nih.gov/compound/meclofenoxate
levonorgestrel	CMAP	https://pubchem.ncbi.nlm.nih.gov/compound/levonorgestrel
cloperastine	CMAP	https://pubchem.ncbi.nlm.nih.gov/compound/cloperastine
sulfamethoxypyridazine	CMAP	https://pubchem.ncbi.nlm.nih.gov/compound/sulfamethoxypyridazine
flumetasone	CMAP	https://pubchem.ncbi.nlm.nih.gov/compound/flumetasone
flunixin	CMAP	https://pubchem.ncbi.nlm.nih.gov/compound/flunixin
fenoprofen	CMAP	https://pubchem.ncbi.nlm.nih.gov/compound/fenoprofen
furaltadone	CMAP	https://pubchem.ncbi.nlm.nih.gov/compound/furaltadone
bendroflumethiazide	CMAP	https://pubchem.ncbi.nlm.nih.gov/compound/bendroflumethiazide
eucatropine	CMAP	https://pubchem.ncbi.nlm.nih.gov/compound/eucatropine
flecainide	CMAP	https://pubchem.ncbi.nlm.nih.gov/compound/flecainide
spiramycin	CMAP	https://pubchem.ncbi.nlm.nih.gov/compound/spiramycin
ethoxyquin	CMAP	https://pubchem.ncbi.nlm.nih.gov/compound/ethoxyquin
sulfadimidine	CMAP	https://pubchem.ncbi.nlm.nih.gov/compound/sulfadimidine
dicoumarol	CMAP	https://pubchem.ncbi.nlm.nih.gov/compound/dicoumarol
isocarboxazid	CMAP	https://pubchem.ncbi.nlm.nih.gov/compound/isocarboxazid
mephentermine	CMAP	https://pubchem.ncbi.nlm.nih.gov/compound/mephentermine
cefazolin	CMAP	https://pubchem.ncbi.nlm.nih.gov/compound/cefazolin
glycopyrronium bromide	CMAP	https://pubchem.ncbi.nlm.nih.gov/compound/glycopyrronium bromide
diethylstilbestrol	CMAP	https://pubchem.ncbi.nlm.nih.gov/compound/diethylstilbestrol
tinidazole	CMAP	https://pubchem.ncbi.nlm.nih.gov/compound/tinidazole
guaifenesin	CMAP	https://pubchem.ncbi.nlm.nih.gov/compound/guaifenesin
thiamazole	CMAP	https://pubchem.ncbi.nlm.nih.gov/compound/thiamazole
lithocholic acid	CMAP	https://pubchem.ncbi.nlm.nih.gov/compound/lithocholic acid
alpha-ergocryptine	CMAP	https://pubchem.ncbi.nlm.nih.gov/compound/alpha-ergocryptine
atractyloside	CMAP	https://pubchem.ncbi.nlm.nih.gov/compound/atractyloside
guanadrel	CMAP	https://pubchem.ncbi.nlm.nih.gov/compound/guanadrel
alexidine	CMAP	https://pubchem.ncbi.nlm.nih.gov/compound/alexidine
merbromin	CMAP	https://pubchem.ncbi.nlm.nih.gov/compound/merbromin
sulfadimethoxine	CMAP	https://pubchem.ncbi.nlm.nih.gov/compound/sulfadimethoxine
calcium folinate	CMAP	https://pubchem.ncbi.nlm.nih.gov/compound/calcium folinate
mimosine	CMAP	https://pubchem.ncbi.nlm.nih.gov/compound/mimosine
ribostamycin	CMAP	https://pubchem.ncbi.nlm.nih.gov/compound/ribostamycin
vidarabine	CMAP	https://pubchem.ncbi.nlm.nih.gov/compound/vidarabine
proadifen	CMAP	https://pubchem.ncbi.nlm.nih.gov/compound/proadifen
hexylcaine	CMAP	https://pubchem.ncbi.nlm.nih.gov/compound/hexylcaine
sulfanilamide	CMAP	https://pubchem.ncbi.nlm.nih.gov/compound/sulfanilamide
corbadrine	CMAP	https://pubchem.ncbi.nlm.nih.gov/compound/corbadrine
isoetarine	CMAP	https://pubchem.ncbi.nlm.nih.gov/compound/isoetarine
sulfametoxydiazine	CMAP	https://pubchem.ncbi.nlm.nih.gov/compound/sulfametoxydiazine
zomepirac	CMAP	https://pubchem.ncbi.nlm.nih.gov/compound/zomepirac
drofenine	CMAP	https://pubchem.ncbi.nlm.nih.gov/compound/drofenine
pridinol	CMAP	https://pubchem.ncbi.nlm.nih.gov/compound/pridinol
hecogenin	CMAP	https://pubchem.ncbi.nlm.nih.gov/compound/hecogenin
ebselen	CMAP	https://pubchem.ncbi.nlm.nih.gov/compound/ebselen
mevalolactone	CMAP	https://pubchem.ncbi.nlm.nih.gov/compound/mevalolactone
pipenzolate bromide	CMAP	https://pubchem.ncbi.nlm.nih.gov/compound/pipenzolate bromide
isopropamide iodide	CMAP	https://pubchem.ncbi.nlm.nih.gov/compound/isopropamide iodide
cinoxacin	CMAP	https://pubchem.ncbi.nlm.nih.gov/compound/cinoxacin
cicloheximide	CMAP	https://pubchem.ncbi.nlm.nih.gov/compound/cicloheximide
amrinone	CMAP	https://pubchem.ncbi.nlm.nih.gov/compound/amrinone
carbinoxamine	CMAP	https://pubchem.ncbi.nlm.nih.gov/compound/carbinoxamine
bergenin	CMAP	https://pubchem.ncbi.nlm.nih.gov/compound/bergenin
azlocillin	CMAP	https://pubchem.ncbi.nlm.nih.gov/compound/azlocillin
butacaine	CMAP	https://pubchem.ncbi.nlm.nih.gov/compound/butacaine
securinine	CMAP	https://pubchem.ncbi.nlm.nih.gov/compound/securinine
cefapirin	CMAP	https://pubchem.ncbi.nlm.nih.gov/compound/cefapirin
gabapentin	CMAP	https://pubchem.ncbi.nlm.nih.gov/compound/gabapentin
iopamidol	CMAP	https://pubchem.ncbi.nlm.nih.gov/compound/iopamidol
methazolamide	CMAP	https://pubchem.ncbi.nlm.nih.gov/compound/methazolamide
clidinium bromide	CMAP	https://pubchem.ncbi.nlm.nih.gov/compound/clidinium bromide
cefoxitin	CMAP	https://pubchem.ncbi.nlm.nih.gov/compound/cefoxitin
alimemazine	CMAP	https://pubchem.ncbi.nlm.nih.gov/compound/alimemazine
iopromide	CMAP	https://pubchem.ncbi.nlm.nih.gov/compound/iopromide
pyrithyldione	CMAP	https://pubchem.ncbi.nlm.nih.gov/compound/pyrithyldione
sulfamonomethoxine	CMAP	https://pubchem.ncbi.nlm.nih.gov/compound/sulfamonomethoxine
DL-thiorphan	CMAP	https://pubchem.ncbi.nlm.nih.gov/compound/DL-thiorphan
alpha-yohimbine	CMAP	https://pubchem.ncbi.nlm.nih.gov/compound/alpha-yohimbine
corynanthine	CMAP	https://pubchem.ncbi.nlm.nih.gov/compound/corynanthine
salsolinol	CMAP	https://pubchem.ncbi.nlm.nih.gov/compound/salsolinol
Prestwick-691	CMAP	https://pubchem.ncbi.nlm.nih.gov/compound/Prestwick-691
mycophenolic acid	CMAP	https://pubchem.ncbi.nlm.nih.gov/compound/mycophenolic acid
harmalol	CMAP	https://pubchem.ncbi.nlm.nih.gov/compound/harmalol
metacycline	CMAP	https://pubchem.ncbi.nlm.nih.gov/compound/metacycline
pronetalol	CMAP	https://pubchem.ncbi.nlm.nih.gov/compound/pronetalol
Prestwick-984	CMAP	https://pubchem.ncbi.nlm.nih.gov/compound/Prestwick-984
cyclopenthiazide	CMAP	https://pubchem.ncbi.nlm.nih.gov/compound/cyclopenthiazide
meptazinol	CMAP	https://pubchem.ncbi.nlm.nih.gov/compound/meptazinol
etofenamate	CMAP	https://pubchem.ncbi.nlm.nih.gov/compound/etofenamate
nifurtimox	CMAP	https://pubchem.ncbi.nlm.nih.gov/compound/nifurtimox
pancuronium bromide	CMAP	https://pubchem.ncbi.nlm.nih.gov/compound/pancuronium bromide
gibberellic acid	CMAP	https://pubchem.ncbi.nlm.nih.gov/compound/gibberellic acid
naftopidil	CMAP	https://pubchem.ncbi.nlm.nih.gov/compound/naftopidil
sitosterol	CMAP	https://pubchem.ncbi.nlm.nih.gov/compound/sitosterol
fluvoxamine	CMAP	https://pubchem.ncbi.nlm.nih.gov/compound/fluvoxamine
apramycin	CMAP	https://pubchem.ncbi.nlm.nih.gov/compound/apramycin
etamsylate	CMAP	https://pubchem.ncbi.nlm.nih.gov/compound/etamsylate
letrozole	CMAP	https://pubchem.ncbi.nlm.nih.gov/compound/letrozole
molindone	CMAP	https://pubchem.ncbi.nlm.nih.gov/compound/molindone
sotalol	CMAP	https://pubchem.ncbi.nlm.nih.gov/compound/sotalol
tracazolate	CMAP	https://pubchem.ncbi.nlm.nih.gov/compound/tracazolate
proscillaridin	CMAP	https://pubchem.ncbi.nlm.nih.gov/compound/proscillaridin
cefalonium	CMAP	https://pubchem.ncbi.nlm.nih.gov/compound/cefalonium
epitiostanol	CMAP	https://pubchem.ncbi.nlm.nih.gov/compound/epitiostanol
moxonidine	CMAP	https://pubchem.ncbi.nlm.nih.gov/compound/moxonidine
oxamniquine	CMAP	https://pubchem.ncbi.nlm.nih.gov/compound/oxamniquine
Prestwick-967	CMAP	https://pubchem.ncbi.nlm.nih.gov/compound/Prestwick-967
zardaverine	CMAP	https://pubchem.ncbi.nlm.nih.gov/compound/zardaverine
sanguinarine	CMAP	https://pubchem.ncbi.nlm.nih.gov/compound/sanguinarine
fluticasone	CMAP	https://pubchem.ncbi.nlm.nih.gov/compound/fluticasone
fursultiamine	CMAP	https://pubchem.ncbi.nlm.nih.gov/compound/fursultiamine
etilefrine	CMAP	https://pubchem.ncbi.nlm.nih.gov/compound/etilefrine
tocainide	CMAP	https://pubchem.ncbi.nlm.nih.gov/compound/tocainide
zalcitabine	CMAP	https://pubchem.ncbi.nlm.nih.gov/compound/zalcitabine
decamethonium bromide	CMAP	https://pubchem.ncbi.nlm.nih.gov/compound/decamethonium bromide
memantine	CMAP	https://pubchem.ncbi.nlm.nih.gov/compound/memantine
harpagoside	CMAP	https://pubchem.ncbi.nlm.nih.gov/compound/harpagoside
zuclopenthixol	CMAP	https://pubchem.ncbi.nlm.nih.gov/compound/zuclopenthixol
gabexate	CMAP	https://pubchem.ncbi.nlm.nih.gov/compound/gabexate
alprostadil	CMAP	https://pubchem.ncbi.nlm.nih.gov/compound/alprostadil
benzathine benzylpenicillin	CMAP	https://pubchem.ncbi.nlm.nih.gov/compound/benzathine benzylpenicillin
methyldopate	CMAP	https://pubchem.ncbi.nlm.nih.gov/compound/methyldopate
3-acetamidocoumarin	CMAP	https://pubchem.ncbi.nlm.nih.gov/compound/3-acetamidocoumarin
ozagrel	CMAP	https://pubchem.ncbi.nlm.nih.gov/compound/ozagrel
asiaticoside	CMAP	https://pubchem.ncbi.nlm.nih.gov/compound/asiaticoside
proguanil	CMAP	https://pubchem.ncbi.nlm.nih.gov/compound/proguanil
pivampicillin	CMAP	https://pubchem.ncbi.nlm.nih.gov/compound/pivampicillin
tribenoside	CMAP	https://pubchem.ncbi.nlm.nih.gov/compound/tribenoside
risperidone	CMAP	https://pubchem.ncbi.nlm.nih.gov/compound/risperidone
levocabastine	CMAP	https://pubchem.ncbi.nlm.nih.gov/compound/levocabastine
roxarsone	CMAP	https://pubchem.ncbi.nlm.nih.gov/compound/roxarsone
piribedil	CMAP	https://pubchem.ncbi.nlm.nih.gov/compound/piribedil
betulin	CMAP	https://pubchem.ncbi.nlm.nih.gov/compound/betulin
lymecycline	CMAP	https://pubchem.ncbi.nlm.nih.gov/compound/lymecycline
talampicillin	CMAP	https://pubchem.ncbi.nlm.nih.gov/compound/talampicillin
rimexolone	CMAP	https://pubchem.ncbi.nlm.nih.gov/compound/rimexolone
torasemide	CMAP	https://pubchem.ncbi.nlm.nih.gov/compound/torasemide
etomidate	CMAP	https://pubchem.ncbi.nlm.nih.gov/compound/etomidate
moracizine	CMAP	https://pubchem.ncbi.nlm.nih.gov/compound/moracizine
phensuximide	CMAP	https://pubchem.ncbi.nlm.nih.gov/compound/phensuximide
S-propranolol	CMAP	https://pubchem.ncbi.nlm.nih.gov/compound/S-propranolol
spaglumic acid	CMAP	https://pubchem.ncbi.nlm.nih.gov/compound/spaglumic acid
netilmicin	CMAP	https://pubchem.ncbi.nlm.nih.gov/compound/netilmicin
tridihexethyl	CMAP	https://pubchem.ncbi.nlm.nih.gov/compound/tridihexethyl
iopanoic acid	CMAP	https://pubchem.ncbi.nlm.nih.gov/compound/iopanoic acid
ioxaglic acid	CMAP	https://pubchem.ncbi.nlm.nih.gov/compound/ioxaglic acid
lansoprazole	CMAP	https://pubchem.ncbi.nlm.nih.gov/compound/lansoprazole
cyclic adenosine monophosphate	CMAP	https://pubchem.ncbi.nlm.nih.gov/compound/cyclic adenosine monophosphate
loracarbef	CMAP	https://pubchem.ncbi.nlm.nih.gov/compound/loracarbef
procarbazine	CMAP	https://pubchem.ncbi.nlm.nih.gov/compound/procarbazine
penbutolol	CMAP	https://pubchem.ncbi.nlm.nih.gov/compound/penbutolol
pivmecillinam	CMAP	https://pubchem.ncbi.nlm.nih.gov/compound/pivmecillinam
naftifine	CMAP	https://pubchem.ncbi.nlm.nih.gov/compound/naftifine
bethanechol	CMAP	https://pubchem.ncbi.nlm.nih.gov/compound/bethanechol
Prestwick-1083	CMAP	https://pubchem.ncbi.nlm.nih.gov/compound/Prestwick-1083
Prestwick-1103	CMAP	https://pubchem.ncbi.nlm.nih.gov/compound/Prestwick-1103
viomycin	CMAP	https://pubchem.ncbi.nlm.nih.gov/compound/viomycin
levopropoxyphene	CMAP	https://pubchem.ncbi.nlm.nih.gov/compound/levopropoxyphene
nafcillin	CMAP	https://pubchem.ncbi.nlm.nih.gov/compound/nafcillin
liothyronine	CMAP	https://pubchem.ncbi.nlm.nih.gov/compound/liothyronine
etidronic acid	CMAP	https://pubchem.ncbi.nlm.nih.gov/compound/etidronic acid
theophylline	CMAP	https://pubchem.ncbi.nlm.nih.gov/compound/theophylline
spectinomycin	CMAP	https://pubchem.ncbi.nlm.nih.gov/compound/spectinomycin
cefsulodin	CMAP	https://pubchem.ncbi.nlm.nih.gov/compound/cefsulodin
benzthiazide	CMAP	https://pubchem.ncbi.nlm.nih.gov/compound/benzthiazide
procyclidine	CMAP	https://pubchem.ncbi.nlm.nih.gov/compound/procyclidine
roxithromycin	CMAP	https://pubchem.ncbi.nlm.nih.gov/compound/roxithromycin
Prestwick-864	CMAP	https://pubchem.ncbi.nlm.nih.gov/compound/Prestwick-864
theobromine	CMAP	https://pubchem.ncbi.nlm.nih.gov/compound/theobromine
piromidic acid	CMAP	https://pubchem.ncbi.nlm.nih.gov/compound/piromidic acid
fosfosal	CMAP	https://pubchem.ncbi.nlm.nih.gov/compound/fosfosal
trichlormethiazide	CMAP	https://pubchem.ncbi.nlm.nih.gov/compound/trichlormethiazide
tetroquinone	CMAP	https://pubchem.ncbi.nlm.nih.gov/compound/tetroquinone
amiprilose	CMAP	https://pubchem.ncbi.nlm.nih.gov/compound/amiprilose
beclometasone	CMAP	https://pubchem.ncbi.nlm.nih.gov/compound/beclometasone
simvastatin	CMAP	https://pubchem.ncbi.nlm.nih.gov/compound/simvastatin
reserpine	CMAP	https://pubchem.ncbi.nlm.nih.gov/compound/reserpine
trimipramine	CMAP	https://pubchem.ncbi.nlm.nih.gov/compound/trimipramine
suprofen	CMAP	https://pubchem.ncbi.nlm.nih.gov/compound/suprofen
oxolamine	CMAP	https://pubchem.ncbi.nlm.nih.gov/compound/oxolamine
indoprofen	CMAP	https://pubchem.ncbi.nlm.nih.gov/compound/indoprofen
mestranol	CMAP	https://pubchem.ncbi.nlm.nih.gov/compound/mestranol
tolmetin	CMAP	https://pubchem.ncbi.nlm.nih.gov/compound/tolmetin
arcaine	CMAP	https://pubchem.ncbi.nlm.nih.gov/compound/arcaine
chloropyramine	CMAP	https://pubchem.ncbi.nlm.nih.gov/compound/chloropyramine
(+/-)-catechin	CMAP	https://pubchem.ncbi.nlm.nih.gov/compound/(+/-)-catechin
propantheline bromide	CMAP	https://pubchem.ncbi.nlm.nih.gov/compound/propantheline bromide
carbenoxolone	CMAP	https://pubchem.ncbi.nlm.nih.gov/compound/carbenoxolone
levobunolol	CMAP	https://pubchem.ncbi.nlm.nih.gov/compound/levobunolol
Prestwick-857	CMAP	https://pubchem.ncbi.nlm.nih.gov/compound/Prestwick-857
paromomycin	CMAP	https://pubchem.ncbi.nlm.nih.gov/compound/paromomycin
scopolamine	CMAP	https://pubchem.ncbi.nlm.nih.gov/compound/scopolamine
furazolidone	CMAP	https://pubchem.ncbi.nlm.nih.gov/compound/furazolidone
nadolol	CMAP	https://pubchem.ncbi.nlm.nih.gov/compound/nadolol
lasalocid	CMAP	https://pubchem.ncbi.nlm.nih.gov/compound/lasalocid
iocetamic acid	CMAP	https://pubchem.ncbi.nlm.nih.gov/compound/iocetamic acid
iodixanol	CMAP	https://pubchem.ncbi.nlm.nih.gov/compound/iodixanol
doxazosin	CMAP	https://pubchem.ncbi.nlm.nih.gov/compound/doxazosin
paracetamol	CMAP	https://pubchem.ncbi.nlm.nih.gov/compound/paracetamol
ioversol	CMAP	https://pubchem.ncbi.nlm.nih.gov/compound/ioversol
diclofenamide	CMAP	https://pubchem.ncbi.nlm.nih.gov/compound/diclofenamide
latamoxef	CMAP	https://pubchem.ncbi.nlm.nih.gov/compound/latamoxef
dimethadione	CMAP	https://pubchem.ncbi.nlm.nih.gov/compound/dimethadione
ganciclovir	CMAP	https://pubchem.ncbi.nlm.nih.gov/compound/ganciclovir
rolitetracycline	CMAP	https://pubchem.ncbi.nlm.nih.gov/compound/rolitetracycline
fluvastatin	CMAP	https://pubchem.ncbi.nlm.nih.gov/compound/fluvastatin
phthalylsulfathiazole	CMAP	https://pubchem.ncbi.nlm.nih.gov/compound/phthalylsulfathiazole
capsaicin	CMAP	https://pubchem.ncbi.nlm.nih.gov/compound/capsaicin
sulconazole	CMAP	https://pubchem.ncbi.nlm.nih.gov/compound/sulconazole
aminophylline	CMAP	https://pubchem.ncbi.nlm.nih.gov/compound/aminophylline
ethaverine	CMAP	https://pubchem.ncbi.nlm.nih.gov/compound/ethaverine
profenamine	CMAP	https://pubchem.ncbi.nlm.nih.gov/compound/profenamine
equilin	CMAP	https://pubchem.ncbi.nlm.nih.gov/compound/equilin
Prestwick-860	CMAP	https://pubchem.ncbi.nlm.nih.gov/compound/Prestwick-860
luteolin	CMAP	https://pubchem.ncbi.nlm.nih.gov/compound/luteolin
carbachol	CMAP	https://pubchem.ncbi.nlm.nih.gov/compound/carbachol
nicotinic acid	CMAP	https://pubchem.ncbi.nlm.nih.gov/compound/nicotinic acid
3-acetylcoumarin	CMAP	https://pubchem.ncbi.nlm.nih.gov/compound/3-acetylcoumarin
hymecromone	CMAP	https://pubchem.ncbi.nlm.nih.gov/compound/hymecromone
(+)-isoprenaline	CMAP	https://pubchem.ncbi.nlm.nih.gov/compound/(+)-isoprenaline
nizatidine	CMAP	https://pubchem.ncbi.nlm.nih.gov/compound/nizatidine
propofol	CMAP	https://pubchem.ncbi.nlm.nih.gov/compound/propofol
pentetic acid	CMAP	https://pubchem.ncbi.nlm.nih.gov/compound/pentetic acid
crotamiton	CMAP	https://pubchem.ncbi.nlm.nih.gov/compound/crotamiton
bemegride	CMAP	https://pubchem.ncbi.nlm.nih.gov/compound/bemegride
esculin	CMAP	https://pubchem.ncbi.nlm.nih.gov/compound/esculin
caffeic acid	CMAP	https://pubchem.ncbi.nlm.nih.gov/compound/caffeic acid
monobenzone	CMAP	https://pubchem.ncbi.nlm.nih.gov/compound/monobenzone
thioperamide	CMAP	https://pubchem.ncbi.nlm.nih.gov/compound/thioperamide
eticlopride	CMAP	https://pubchem.ncbi.nlm.nih.gov/compound/eticlopride
bretylium tosilate	CMAP	https://pubchem.ncbi.nlm.nih.gov/compound/bretylium tosilate
propranolol	CMAP	https://pubchem.ncbi.nlm.nih.gov/compound/propranolol
digoxigenin	CMAP	https://pubchem.ncbi.nlm.nih.gov/compound/digoxigenin
felbinac	CMAP	https://pubchem.ncbi.nlm.nih.gov/compound/felbinac
diloxanide	CMAP	https://pubchem.ncbi.nlm.nih.gov/compound/diloxanide
2-aminobenzenesulfonamide	CMAP	https://pubchem.ncbi.nlm.nih.gov/compound/2-aminobenzenesulfonamide
xamoterol	CMAP	https://pubchem.ncbi.nlm.nih.gov/compound/xamoterol
primidone	CMAP	https://pubchem.ncbi.nlm.nih.gov/compound/primidone
pralidoxime	CMAP	https://pubchem.ncbi.nlm.nih.gov/compound/pralidoxime
(-)-atenolol	CMAP	https://pubchem.ncbi.nlm.nih.gov/compound/(-)-atenolol
meglumine	CMAP	https://pubchem.ncbi.nlm.nih.gov/compound/meglumine
butyl hydroxybenzoate	CMAP	https://pubchem.ncbi.nlm.nih.gov/compound/butyl hydroxybenzoate
metyrapone	CMAP	https://pubchem.ncbi.nlm.nih.gov/compound/metyrapone
estrone	CMAP	https://pubchem.ncbi.nlm.nih.gov/compound/estrone
rolipram	CMAP	https://pubchem.ncbi.nlm.nih.gov/compound/rolipram
flucytosine	CMAP	https://pubchem.ncbi.nlm.nih.gov/compound/flucytosine
tyloxapol	CMAP	https://pubchem.ncbi.nlm.nih.gov/compound/tyloxapol
cantharidin	CMAP	https://pubchem.ncbi.nlm.nih.gov/compound/cantharidin
aminohippuric acid	CMAP	https://pubchem.ncbi.nlm.nih.gov/compound/aminohippuric acid
urapidil	CMAP	https://pubchem.ncbi.nlm.nih.gov/compound/urapidil
lorglumide	CMAP	https://pubchem.ncbi.nlm.nih.gov/compound/lorglumide
tonzonium bromide	CMAP	https://pubchem.ncbi.nlm.nih.gov/compound/tonzonium bromide
(-)-MK-801	CMAP	https://pubchem.ncbi.nlm.nih.gov/compound/(-)-MK-801
terguride	CMAP	https://pubchem.ncbi.nlm.nih.gov/compound/terguride
florfenicol	CMAP	https://pubchem.ncbi.nlm.nih.gov/compound/florfenicol
clioquinol	CMAP	https://pubchem.ncbi.nlm.nih.gov/compound/clioquinol
N-acetyl-L-leucine	CMAP	https://pubchem.ncbi.nlm.nih.gov/compound/N-acetyl-L-leucine
fluspirilene	CMAP	https://pubchem.ncbi.nlm.nih.gov/compound/fluspirilene
idazoxan	CMAP	https://pubchem.ncbi.nlm.nih.gov/compound/idazoxan
bephenium hydroxynaphthoate	CMAP	https://pubchem.ncbi.nlm.nih.gov/compound/bephenium hydroxynaphthoate
altretamine	CMAP	https://pubchem.ncbi.nlm.nih.gov/compound/altretamine
megestrol	CMAP	https://pubchem.ncbi.nlm.nih.gov/compound/megestrol
oxybenzone	CMAP	https://pubchem.ncbi.nlm.nih.gov/compound/oxybenzone
pipemidic acid	CMAP	https://pubchem.ncbi.nlm.nih.gov/compound/pipemidic acid
dexibuprofen	CMAP	https://pubchem.ncbi.nlm.nih.gov/compound/dexibuprofen
flurbiprofen	CMAP	https://pubchem.ncbi.nlm.nih.gov/compound/flurbiprofen
prasterone	CMAP	https://pubchem.ncbi.nlm.nih.gov/compound/prasterone
desoxycortone	CMAP	https://pubchem.ncbi.nlm.nih.gov/compound/desoxycortone
promethazine	CMAP	https://pubchem.ncbi.nlm.nih.gov/compound/promethazine
dioxybenzone	CMAP	https://pubchem.ncbi.nlm.nih.gov/compound/dioxybenzone
etynodiol	CMAP	https://pubchem.ncbi.nlm.nih.gov/compound/etynodiol
nimodipine	CMAP	https://pubchem.ncbi.nlm.nih.gov/compound/nimodipine
nilutamide	CMAP	https://pubchem.ncbi.nlm.nih.gov/compound/nilutamide
ursodeoxycholic acid	CMAP	https://pubchem.ncbi.nlm.nih.gov/compound/ursodeoxycholic acid
chrysin	CMAP	https://pubchem.ncbi.nlm.nih.gov/compound/chrysin
adrenosterone	CMAP	https://pubchem.ncbi.nlm.nih.gov/compound/adrenosterone
nabumetone	CMAP	https://pubchem.ncbi.nlm.nih.gov/compound/nabumetone
bacitracin	CMAP	https://pubchem.ncbi.nlm.nih.gov/compound/bacitracin
ketorolac	CMAP	https://pubchem.ncbi.nlm.nih.gov/compound/ketorolac
adipiodone	CMAP	https://pubchem.ncbi.nlm.nih.gov/compound/adipiodone
octopamine	CMAP	https://pubchem.ncbi.nlm.nih.gov/compound/octopamine
proxymetacaine	CMAP	https://pubchem.ncbi.nlm.nih.gov/compound/proxymetacaine
proxyphylline	CMAP	https://pubchem.ncbi.nlm.nih.gov/compound/proxyphylline
atropine methonitrate	CMAP	https://pubchem.ncbi.nlm.nih.gov/compound/atropine methonitrate
nisoxetine	CMAP	https://pubchem.ncbi.nlm.nih.gov/compound/nisoxetine
Prestwick-920	CMAP	https://pubchem.ncbi.nlm.nih.gov/compound/Prestwick-920
protriptyline	CMAP	https://pubchem.ncbi.nlm.nih.gov/compound/protriptyline
esculetin	CMAP	https://pubchem.ncbi.nlm.nih.gov/compound/esculetin
nipecotic acid	CMAP	https://pubchem.ncbi.nlm.nih.gov/compound/nipecotic acid
aminocaproic acid	CMAP	https://pubchem.ncbi.nlm.nih.gov/compound/aminocaproic acid
denatonium benzoate	CMAP	https://pubchem.ncbi.nlm.nih.gov/compound/denatonium benzoate
remoxipride	CMAP	https://pubchem.ncbi.nlm.nih.gov/compound/remoxipride
Prestwick-981	CMAP	https://pubchem.ncbi.nlm.nih.gov/compound/Prestwick-981
gliquidone	CMAP	https://pubchem.ncbi.nlm.nih.gov/compound/gliquidone
alfadolone	CMAP	https://pubchem.ncbi.nlm.nih.gov/compound/alfadolone
flucloxacillin	CMAP	https://pubchem.ncbi.nlm.nih.gov/compound/flucloxacillin
isradipine	CMAP	https://pubchem.ncbi.nlm.nih.gov/compound/isradipine
halofantrine	CMAP	https://pubchem.ncbi.nlm.nih.gov/compound/halofantrine
scopoletin	CMAP	https://pubchem.ncbi.nlm.nih.gov/compound/scopoletin
Prestwick-972	CMAP	https://pubchem.ncbi.nlm.nih.gov/compound/Prestwick-972
rilmenidine	CMAP	https://pubchem.ncbi.nlm.nih.gov/compound/rilmenidine
pizotifen	CMAP	https://pubchem.ncbi.nlm.nih.gov/compound/pizotifen
alfaxalone	CMAP	https://pubchem.ncbi.nlm.nih.gov/compound/alfaxalone
trapidil	CMAP	https://pubchem.ncbi.nlm.nih.gov/compound/trapidil
tiletamine	CMAP	https://pubchem.ncbi.nlm.nih.gov/compound/tiletamine
articaine	CMAP	https://pubchem.ncbi.nlm.nih.gov/compound/articaine
enilconazole	CMAP	https://pubchem.ncbi.nlm.nih.gov/compound/enilconazole
pirlindole	CMAP	https://pubchem.ncbi.nlm.nih.gov/compound/pirlindole
Prestwick-983	CMAP	https://pubchem.ncbi.nlm.nih.gov/compound/Prestwick-983
ribavirin	CMAP	https://pubchem.ncbi.nlm.nih.gov/compound/ribavirin
azapropazone	CMAP	https://pubchem.ncbi.nlm.nih.gov/compound/azapropazone
deptropine	CMAP	https://pubchem.ncbi.nlm.nih.gov/compound/deptropine
isometheptene	CMAP	https://pubchem.ncbi.nlm.nih.gov/compound/isometheptene
clofilium tosylate	CMAP	https://pubchem.ncbi.nlm.nih.gov/compound/clofilium tosylate
quinidine	CMAP	https://pubchem.ncbi.nlm.nih.gov/compound/quinidine
lidoflazine	CMAP	https://pubchem.ncbi.nlm.nih.gov/compound/lidoflazine
mitoxantrone	CMAP	https://pubchem.ncbi.nlm.nih.gov/compound/mitoxantrone
hydrocortisone	CMAP	https://pubchem.ncbi.nlm.nih.gov/compound/hydrocortisone
doxorubicin	CMAP	https://pubchem.ncbi.nlm.nih.gov/compound/doxorubicin
methoxsalen	CMAP	https://pubchem.ncbi.nlm.nih.gov/compound/methoxsalen
azacitidine	CMAP	https://pubchem.ncbi.nlm.nih.gov/compound/azacitidine
fluocinonide	CMAP	https://pubchem.ncbi.nlm.nih.gov/compound/fluocinonide
piperacillin	CMAP	https://pubchem.ncbi.nlm.nih.gov/compound/piperacillin
cefamandole	CMAP	https://pubchem.ncbi.nlm.nih.gov/compound/cefamandole
levomepromazine	CMAP	https://pubchem.ncbi.nlm.nih.gov/compound/levomepromazine
dienestrol	CMAP	https://pubchem.ncbi.nlm.nih.gov/compound/dienestrol
methacholine chloride	CMAP	https://pubchem.ncbi.nlm.nih.gov/compound/methacholine chloride
cromoglicic acid	CMAP	https://pubchem.ncbi.nlm.nih.gov/compound/cromoglicic acid
ifosfamide	CMAP	https://pubchem.ncbi.nlm.nih.gov/compound/ifosfamide
imidurea	CMAP	https://pubchem.ncbi.nlm.nih.gov/compound/imidurea
mecamylamine	CMAP	https://pubchem.ncbi.nlm.nih.gov/compound/mecamylamine
Prestwick-1082	CMAP	https://pubchem.ncbi.nlm.nih.gov/compound/Prestwick-1082
prednicarbate	CMAP	https://pubchem.ncbi.nlm.nih.gov/compound/prednicarbate
meprylcaine	CMAP	https://pubchem.ncbi.nlm.nih.gov/compound/meprylcaine
cyproterone	CMAP	https://pubchem.ncbi.nlm.nih.gov/compound/cyproterone
Prestwick-1084	CMAP	https://pubchem.ncbi.nlm.nih.gov/compound/Prestwick-1084
sulfadoxine	CMAP	https://pubchem.ncbi.nlm.nih.gov/compound/sulfadoxine
natamycin	CMAP	https://pubchem.ncbi.nlm.nih.gov/compound/natamycin
saquinavir	CMAP	https://pubchem.ncbi.nlm.nih.gov/compound/saquinavir
sertaconazole	CMAP	https://pubchem.ncbi.nlm.nih.gov/compound/sertaconazole
piperidolate	CMAP	https://pubchem.ncbi.nlm.nih.gov/compound/piperidolate
milrinone	CMAP	https://pubchem.ncbi.nlm.nih.gov/compound/milrinone
dexpropranolol	CMAP	https://pubchem.ncbi.nlm.nih.gov/compound/dexpropranolol
Prestwick-1085	CMAP	https://pubchem.ncbi.nlm.nih.gov/compound/Prestwick-1085
cyclopentolate	CMAP	https://pubchem.ncbi.nlm.nih.gov/compound/cyclopentolate
verteporfin	CMAP	https://pubchem.ncbi.nlm.nih.gov/compound/verteporfin
ronidazole	CMAP	https://pubchem.ncbi.nlm.nih.gov/compound/ronidazole
repaglinide	CMAP	https://pubchem.ncbi.nlm.nih.gov/compound/repaglinide
trifluridine	CMAP	https://pubchem.ncbi.nlm.nih.gov/compound/trifluridine
methanthelinium bromide	CMAP	https://pubchem.ncbi.nlm.nih.gov/compound/methanthelinium bromide
ciprofibrate	CMAP	https://pubchem.ncbi.nlm.nih.gov/compound/ciprofibrate
cycloserine	CMAP	https://pubchem.ncbi.nlm.nih.gov/compound/cycloserine
estriol	CMAP	https://pubchem.ncbi.nlm.nih.gov/compound/estriol
meropenem	CMAP	https://pubchem.ncbi.nlm.nih.gov/compound/meropenem
dorzolamide	CMAP	https://pubchem.ncbi.nlm.nih.gov/compound/dorzolamide
piretanide	CMAP	https://pubchem.ncbi.nlm.nih.gov/compound/piretanide
oxprenolol	CMAP	https://pubchem.ncbi.nlm.nih.gov/compound/oxprenolol
tropine	CMAP	https://pubchem.ncbi.nlm.nih.gov/compound/tropine
chloropyrazine	CMAP	https://pubchem.ncbi.nlm.nih.gov/compound/chloropyrazine
(-)-isoprenaline	CMAP	https://pubchem.ncbi.nlm.nih.gov/compound/(-)-isoprenaline
ramipril	CMAP	https://pubchem.ncbi.nlm.nih.gov/compound/ramipril
azaperone	CMAP	https://pubchem.ncbi.nlm.nih.gov/compound/azaperone
piperacetazine	CMAP	https://pubchem.ncbi.nlm.nih.gov/compound/piperacetazine
ondansetron	CMAP	https://pubchem.ncbi.nlm.nih.gov/compound/ondansetron
thiethylperazine	CMAP	https://pubchem.ncbi.nlm.nih.gov/compound/thiethylperazine
benzylpenicillin	CMAP	https://pubchem.ncbi.nlm.nih.gov/compound/benzylpenicillin
oxedrine	CMAP	https://pubchem.ncbi.nlm.nih.gov/compound/oxedrine
kaempferol	CMAP	https://pubchem.ncbi.nlm.nih.gov/compound/kaempferol
mephenytoin	CMAP	https://pubchem.ncbi.nlm.nih.gov/compound/mephenytoin
cefepime	CMAP	https://pubchem.ncbi.nlm.nih.gov/compound/cefepime
oxyphenbutazone	CMAP	https://pubchem.ncbi.nlm.nih.gov/compound/oxyphenbutazone
propoxycaine	CMAP	https://pubchem.ncbi.nlm.nih.gov/compound/propoxycaine
PNU-0230031	CMAP	https://pubchem.ncbi.nlm.nih.gov/compound/PNU-0230031
0179445-0000	CMAP	https://pubchem.ncbi.nlm.nih.gov/compound/0179445-0000
PNU-0251126	CMAP	https://pubchem.ncbi.nlm.nih.gov/compound/PNU-0251126
0173570-0000	CMAP	https://pubchem.ncbi.nlm.nih.gov/compound/0173570-0000
0175029-0000	CMAP	https://pubchem.ncbi.nlm.nih.gov/compound/0175029-0000
PHA-00851261E	CMAP	https://pubchem.ncbi.nlm.nih.gov/compound/PHA-00851261E
0317956-0000	CMAP	https://pubchem.ncbi.nlm.nih.gov/compound/0317956-0000
chlorambucil	CMAP	https://pubchem.ncbi.nlm.nih.gov/compound/chlorambucil
levcycloserine	CMAP	https://pubchem.ncbi.nlm.nih.gov/compound/levcycloserine
nialamide	CMAP	https://pubchem.ncbi.nlm.nih.gov/compound/nialamide
quinethazone	CMAP	https://pubchem.ncbi.nlm.nih.gov/compound/quinethazone
santonin	CMAP	https://pubchem.ncbi.nlm.nih.gov/compound/santonin
Prestwick-1080	CMAP	https://pubchem.ncbi.nlm.nih.gov/compound/Prestwick-1080
homosalate	CMAP	https://pubchem.ncbi.nlm.nih.gov/compound/homosalate
Prestwick-1100	CMAP	https://pubchem.ncbi.nlm.nih.gov/compound/Prestwick-1100
parbendazole	CMAP	https://pubchem.ncbi.nlm.nih.gov/compound/parbendazole
ciclacillin	CMAP	https://pubchem.ncbi.nlm.nih.gov/compound/ciclacillin
2,6-dimethylpiperidine	CMAP	https://pubchem.ncbi.nlm.nih.gov/compound/2,6-dimethylpiperidine
spiradoline	CMAP	https://pubchem.ncbi.nlm.nih.gov/compound/spiradoline
withaferin A	CMAP	https://pubchem.ncbi.nlm.nih.gov/compound/withaferin A
citalopram	CMAP	https://pubchem.ncbi.nlm.nih.gov/compound/citalopram
paroxetine	CMAP	https://pubchem.ncbi.nlm.nih.gov/compound/paroxetine
CP-320650-01	CMAP	https://pubchem.ncbi.nlm.nih.gov/compound/CP-320650-01
CP-690334-01	CMAP	https://pubchem.ncbi.nlm.nih.gov/compound/CP-690334-01
PHA-00745360	CMAP	https://pubchem.ncbi.nlm.nih.gov/compound/PHA-00745360
rifabutin	CMAP	https://pubchem.ncbi.nlm.nih.gov/compound/rifabutin
alcuronium chloride	CMAP	https://pubchem.ncbi.nlm.nih.gov/compound/alcuronium chloride
clobetasol	CMAP	https://pubchem.ncbi.nlm.nih.gov/compound/clobetasol
phenoxybenzamine	CMAP	https://pubchem.ncbi.nlm.nih.gov/compound/phenoxybenzamine
timolol	CMAP	https://pubchem.ncbi.nlm.nih.gov/compound/timolol
daunorubicin	CMAP	https://pubchem.ncbi.nlm.nih.gov/compound/daunorubicin
nomegestrol	CMAP	https://pubchem.ncbi.nlm.nih.gov/compound/nomegestrol
ticarcillin	CMAP	https://pubchem.ncbi.nlm.nih.gov/compound/ticarcillin
AG-013608	CMAP	https://pubchem.ncbi.nlm.nih.gov/compound/AG-013608
valinomycin	CMAP	https://pubchem.ncbi.nlm.nih.gov/compound/valinomycin
rotenone	CMAP	https://pubchem.ncbi.nlm.nih.gov/compound/rotenone
PF-00562151-00	CMAP	https://pubchem.ncbi.nlm.nih.gov/compound/PF-00562151-00
PF-00875133-00	CMAP	https://pubchem.ncbi.nlm.nih.gov/compound/PF-00875133-00
pioglitazone	CMAP	https://pubchem.ncbi.nlm.nih.gov/compound/pioglitazone
H-7	CMAP	https://pubchem.ncbi.nlm.nih.gov/compound/H-7
PF-00539745-00	CMAP	https://pubchem.ncbi.nlm.nih.gov/compound/PF-00539745-00
PF-01378883-00	CMAP	https://pubchem.ncbi.nlm.nih.gov/compound/PF-01378883-00
erastin	CMAP	https://pubchem.ncbi.nlm.nih.gov/compound/erastin
3-nitropropionic acid	CMAP	https://pubchem.ncbi.nlm.nih.gov/compound/3-nitropropionic acid
valdecoxib	CMAP	https://pubchem.ncbi.nlm.nih.gov/compound/valdecoxib
PF-00539758-00	CMAP	https://pubchem.ncbi.nlm.nih.gov/compound/PF-00539758-00
STOCK1N-35215	CMAP	https://pubchem.ncbi.nlm.nih.gov/compound/STOCK1N-35215
orlistat	CMAP	https://pubchem.ncbi.nlm.nih.gov/compound/orlistat
0225151-0000	CMAP	https://pubchem.ncbi.nlm.nih.gov/compound/0225151-0000
5707885	CMAP	https://pubchem.ncbi.nlm.nih.gov/compound/5707885
C-75	CMAP	https://pubchem.ncbi.nlm.nih.gov/compound/C-75
F0447-0125	CMAP	https://pubchem.ncbi.nlm.nih.gov/compound/F0447-0125
5155877	CMAP	https://pubchem.ncbi.nlm.nih.gov/compound/5155877
PHA-00767505E	CMAP	https://pubchem.ncbi.nlm.nih.gov/compound/PHA-00767505E
dinoprostone	CMAP	https://pubchem.ncbi.nlm.nih.gov/compound/dinoprostone
5194442	CMAP	https://pubchem.ncbi.nlm.nih.gov/compound/5194442
AG-028671	CMAP	https://pubchem.ncbi.nlm.nih.gov/compound/AG-028671
6-bromoindirubin-3'-oxime	CMAP	https://pubchem.ncbi.nlm.nih.gov/compound/6-bromoindirubin-3'-oxime
Gly-His-Lys	CMAP	https://pubchem.ncbi.nlm.nih.gov/compound/Gly-His-Lys
STOCK1N-35874	CMAP	https://pubchem.ncbi.nlm.nih.gov/compound/STOCK1N-35874
16,16-dimethylprostaglandin E2	CMAP	https://pubchem.ncbi.nlm.nih.gov/compound/16,16-dimethylprostaglandin E2
PNU-0293363	CMAP	https://pubchem.ncbi.nlm.nih.gov/compound/PNU-0293363
STOCK1N-35696	CMAP	https://pubchem.ncbi.nlm.nih.gov/compound/STOCK1N-35696
STOCK1N-28457	CMAP	https://pubchem.ncbi.nlm.nih.gov/compound/STOCK1N-28457
SC-560	CMAP	https://pubchem.ncbi.nlm.nih.gov/compound/SC-560
H-89	CMAP	https://pubchem.ncbi.nlm.nih.gov/compound/H-89
BAS-012416453	CMAP	https://pubchem.ncbi.nlm.nih.gov/compound/BAS-012416453
SB-202190	CMAP	https://pubchem.ncbi.nlm.nih.gov/compound/SB-202190
carmustine	CMAP	https://pubchem.ncbi.nlm.nih.gov/compound/carmustine
AG-012559	CMAP	https://pubchem.ncbi.nlm.nih.gov/compound/AG-012559
AH-23848	CMAP	https://pubchem.ncbi.nlm.nih.gov/compound/AH-23848
NS-398	CMAP	https://pubchem.ncbi.nlm.nih.gov/compound/NS-398
SB-203580	CMAP	https://pubchem.ncbi.nlm.nih.gov/compound/SB-203580
0297417-0002B	CMAP	https://pubchem.ncbi.nlm.nih.gov/compound/0297417-0002B
scriptaid	CMAP	https://pubchem.ncbi.nlm.nih.gov/compound/scriptaid
lomustine	CMAP	https://pubchem.ncbi.nlm.nih.gov/compound/lomustine
PHA-00846566E	CMAP	https://pubchem.ncbi.nlm.nih.gov/compound/PHA-00846566E
AH-6809	CMAP	https://pubchem.ncbi.nlm.nih.gov/compound/AH-6809
alsterpaullone	CMAP	https://pubchem.ncbi.nlm.nih.gov/compound/alsterpaullone
0316684-0000	CMAP	https://pubchem.ncbi.nlm.nih.gov/compound/0316684-0000
thapsigargin	CMAP	https://pubchem.ncbi.nlm.nih.gov/compound/thapsigargin
SC-19220	CMAP	https://pubchem.ncbi.nlm.nih.gov/compound/SC-19220
GW-8510	CMAP	https://pubchem.ncbi.nlm.nih.gov/compound/GW-8510
MG-262	CMAP	https://pubchem.ncbi.nlm.nih.gov/compound/MG-262
0198306-0000	CMAP	https://pubchem.ncbi.nlm.nih.gov/compound/0198306-0000
AR-A014418	CMAP	https://pubchem.ncbi.nlm.nih.gov/compound/AR-A014418
CAY-10397	CMAP	https://pubchem.ncbi.nlm.nih.gov/compound/CAY-10397
PHA-00816795	CMAP	https://pubchem.ncbi.nlm.nih.gov/compound/PHA-00816795
MS-275	CMAP	https://pubchem.ncbi.nlm.nih.gov/compound/MS-275
CP-319743	CMAP	https://pubchem.ncbi.nlm.nih.gov/compound/CP-319743
semustine	CMAP	https://pubchem.ncbi.nlm.nih.gov/compound/semustine
BCB000040	CMAP	https://pubchem.ncbi.nlm.nih.gov/compound/BCB000040
15(S)-15-methylprostaglandin E2	CMAP	https://pubchem.ncbi.nlm.nih.gov/compound/15(S)-15-methylprostaglandin E2
suramin sodium	CMAP	https://pubchem.ncbi.nlm.nih.gov/compound/suramin sodium
CP-944629	CMAP	https://pubchem.ncbi.nlm.nih.gov/compound/CP-944629
irinotecan	CMAP	https://pubchem.ncbi.nlm.nih.gov/compound/irinotecan
meteneprost	CMAP	https://pubchem.ncbi.nlm.nih.gov/compound/meteneprost
16-phenyltetranorprostaglandin E2	CMAP	https://pubchem.ncbi.nlm.nih.gov/compound/16-phenyltetranorprostaglandin E2
CP-863187	CMAP	https://pubchem.ncbi.nlm.nih.gov/compound/CP-863187
BCB000039	CMAP	https://pubchem.ncbi.nlm.nih.gov/compound/BCB000039
IC-86621	CMAP	https://pubchem.ncbi.nlm.nih.gov/compound/IC-86621
11-deoxy-16	CMAP	https://pubchem.ncbi.nlm.nih.gov/compound/11-deoxy-16
CP-645525-01	CMAP	https://pubchem.ncbi.nlm.nih.gov/compound/CP-645525-01
BCB000038	CMAP	https://pubchem.ncbi.nlm.nih.gov/compound/BCB000038
vinblastine	CMAP	https://pubchem.ncbi.nlm.nih.gov/compound/vinblastine

## Sheet: Table S5
Table S5. Tres score predictions and immunotherapy responses of all datasets in Fig. 2e-i
Database	Response	Predict-Low	Predict-Middle	Predict-High
Fraietta	NR	12	11	3
Fraietta	PR	0	2	2
Fraietta	CR	1	1	2
GSE123813-BCC	NR	4	1	0
GSE123813-BCC	PR	1	3	0
GSE123813-BCC	CR	0	1	0
GSE123813-SCC	NR	2	0	0
GSE123813-SCC	PR	0	0	0
GSE123813-SCC	CR	0	1	1
SKCM	NR	6	2	0
SKCM	PR	1	3	0
SKCM	CR	0	0	1

## Sheet: Table S6
Table S6. Top 50 comboSC predictions for low and middle immune score samples
Dataset Name	Patient id	Patient id in paper	Tregs level	Top1	Top2	Top3	Top4	Top5	Top6	Top7	Top8	Top9	Top10	Top11	Top12	Top13	Top14	Top15	Top16	Top17	Top18	Top19	Top20	Top21	Top22	Top23	Top24	Top25	Top26	Top27	Top28	Top29	Top30	Top31	Top32	Top33	Top34	Top35	Top36	Top37	Top38	Top39	Top40	Top41	Top42	Top43	Top44	Top45	Top46
CRA001160	2	T4	Middle	MS-275	5109870	gossypol	15-delta prostaglandin J2	trifluoperazine	0173570-0000	niclosamide	ciclosporin	phenoxybenzamine	etacrynic acid	fluphenazine	spiperone	resveratrol	pimozide	emetine	puromycin	astemizole	pyrvinium	azacyclonol	thioridazine	antimycin A	econazole	etoposide	PNU-0230031	8-azaguanine	clotrimazole	monobenzone	clioquinol	prochlorperazine	nortriptyline	azacitidine	STOCK1N-35215	celastrol	ciclopirox	fluspirilene	prenylamine	norcyclobenzaprine	glibenclamide	calmidazolium	cloperastine	semustine	ivermectin	nifedipine	tretinoin	methotrexate	cantharidin
CRA001160	3	T6	Low	Dactolisib + QL-VIII-58	Tenovin-6 + QL-VIII-58	CPI-613 + QL-VIII-58	Tenovin-6 + Dactolisib	CPI-613 + Dactolisib	CPI-613 + Tenovin-6	PF-00299804 + Enzastaurin	Pilaralisib + Enzastaurin	KIN001-266 + Enzastaurin	Pilaralisib + PF-00299804	KIN001-266 + PF-00299804	KIN001-266 + Pilaralisib	Midostaurin + JNJ38877605	SU11274 + JNJ38877605	SU11274 + Midostaurin	Torin 2 + JNJ38877605	Torin 2 + Midostaurin	Torin 2 + SU11274	Thapsigargin + Sepantronium bromide	JW-7-52-1 + Sepantronium bromide	JW-7-52-1 + Thapsigargin	GW843682X + Sepantronium bromide	GW843682X + Thapsigargin	GW843682X + JW-7-52-1	Elesclomol + OSI-027	Paclitaxel + OSI-027	A-443654 + OSI-027	Paclitaxel + Elesclomol	A-443654 + Elesclomol	A-443654 + Paclitaxel	WYE-125132 + BI-2536	Apitolisib + BI-2536	Apitolisib + WYE-125132	Vincristine + BI-2536	Vincristine + WYE-125132	Vincristine + Apitolisib	Z-LLNle-CHO + CGP-60474	AZ628 + CGP-60474	AZ628 + Z-LLNle-CHO	Vinorelbine + CGP-60474	Vinorelbine + Z-LLNle-CHO	Vinorelbine + AZ628	Obatoclax Mesylate + Mitoxantrone	Refametinib + Mitoxantrone	IMD-0354 + Mitoxantrone	Refametinib + Obatoclax Mesylate
CRA001160	4	T7	Low	CUDC-101 + Sepantronium bromide	AR-42 + Sepantronium bromide	Elesclomol + Sepantronium bromide	AR-42 + CUDC-101	Elesclomol + CUDC-101	Elesclomol + AR-42	Mitomycin-C + Dactinomycin	Gemcitabine + Dactinomycin	Gemcitabine + Mitomycin-C	Dacinostat + Dactinomycin	Dacinostat + Mitomycin-C	Dacinostat + Gemcitabine	CAY10603 + Obatoclax Mesylate	OSI-027 + Obatoclax Mesylate	Belinostat + Obatoclax Mesylate	OSI-027 + CAY10603	Belinostat + CAY10603	Belinostat + OSI-027	Bleomycin + SN-38	Luminespib + SN-38	Luminespib + Bleomycin	PI-103 + SN-38	PI-103 + Bleomycin	PI-103 + Luminespib	GNE-317 + Piperlongumine	Trametinib + Piperlongumine	Temsirolimus + Piperlongumine	Trametinib + GNE-317	Temsirolimus + GNE-317	Temsirolimus + Trametinib	Doxorubicin + Bortezomib	Daporinad + Bortezomib	Daporinad + Doxorubicin	Telomerase Inhibitor IX + Bortezomib	Telomerase Inhibitor IX + Doxorubicin	Telomerase Inhibitor IX + Daporinad	(5Z)-7-Oxozeaenol + ICL1100013	AZD7762 + ICL1100013	DMOG + ICL1100013	AZD7762 + (5Z)-7-Oxozeaenol	DMOG + (5Z)-7-Oxozeaenol	THZ-2-49 + (5Z)-7-Oxozeaenol	CI-1040 + (5Z)-7-Oxozeaenol	Pelitinib + (5Z)-7-Oxozeaenol	DMOG + AZD7762	UNC0638 + (5Z)-7-Oxozeaenol
CRA001160	5	T8	Low	Belinostat + IMD-0354	DMOG + IMD-0354	DMOG + Belinostat	CUDC-101 + IMD-0354	CUDC-101 + Belinostat	CUDC-101 + DMOG	Sabutoclax + Flavopiridol	CAY10603 + Flavopiridol	SNX-2112 + Flavopiridol	CAY10603 + Sabutoclax	SNX-2112 + Sabutoclax	SNX-2112 + CAY10603	Vinblastine + CD532	AR-42 + CD532	AR-42 + Vinblastine	ARRY-520 + CD532	ARRY-520 + Vinblastine	ARRY-520 + AR-42	AZD8055 + Sepantronium bromide	OF-1 + Sepantronium bromide	WIKI4 + Sepantronium bromide	OF-1 + AZD8055	WIKI4 + AZD8055	WIKI4 + OF-1	VE821 + IPA-3	AT13148 + IPA-3	Phenformin + IPA-3	AT13148 + VE821	Phenformin + VE821	Phenformin + AT13148	Genentech Cpd 10 + I-BRD9	Tubastatin A + I-BRD9	RVX-208 + Picolinici-acid	BX795 + I-BRD9	Tubastatin A + Genentech Cpd 10	BX795 + Genentech Cpd 10	BX795 + Tubastatin A	CAP-232, TT-232, TLN-232 + Bosutinib	THZ-2-49 + Bosutinib	THZ-2-49 + CAP-232, TT-232, TLN-232	KU-55933 + Bosutinib	KU-55933 + CAP-232, TT-232, TLN-232	KU-55933 + THZ-2-49	EHT-1864 + NVP-BHG712	CCT007093 + NVP-BHG712	IC-87114 + NVP-BHG712
CRA001160	6	T9	Low	Torin 2 + Sepantronium bromide	Trametinib + Sepantronium bromide	Thapsigargin + Sepantronium bromide	Trametinib + Torin 2	Thapsigargin + Torin 2	Thapsigargin + Trametinib	Shikonin + Obatoclax Mesylate	WYE-125132 + Obatoclax Mesylate	Gemcitabine + Obatoclax Mesylate	WYE-125132 + Shikonin	Gemcitabine + Shikonin	Gemcitabine + WYE-125132	Dacinostat + Apitolisib	IMD-0354 + Apitolisib	IMD-0354 + Dacinostat	GSK1059615 + Apitolisib	GSK1059615 + Dacinostat	GSK1059615 + IMD-0354	(5Z)-7-Oxozeaenol + Panobinostat	Belinostat + Panobinostat	DMOG + Panobinostat	Belinostat + (5Z)-7-Oxozeaenol	DMOG + (5Z)-7-Oxozeaenol	Luminespib + (5Z)-7-Oxozeaenol	DMOG + Belinostat	Mitomycin-C + (5Z)-7-Oxozeaenol	Mitomycin-C + Luminespib	Bleomycin (50 uM) + (5Z)-7-Oxozeaenol	Bleomycin (50 uM) + Luminespib	Doxorubicin + (5Z)-7-Oxozeaenol	Bleomycin (50 uM) + Mitomycin-C	GNE-317 + (5Z)-7-Oxozeaenol	Epothilone B + (5Z)-7-Oxozeaenol	AT-7519 + (5Z)-7-Oxozeaenol	PI-103 + (5Z)-7-Oxozeaenol	CUDC-101 + (5Z)-7-Oxozeaenol	JNK-9L + (5Z)-7-Oxozeaenol	Flavopiridol + (5Z)-7-Oxozeaenol	Sabutoclax + (5Z)-7-Oxozeaenol	Trichostatin A + (5Z)-7-Oxozeaenol	ICL1100013 + (5Z)-7-Oxozeaenol	CAY10603 + (5Z)-7-Oxozeaenol	Etoposide + (5Z)-7-Oxozeaenol	SNX-2112 + (5Z)-7-Oxozeaenol	Dinaciclib + (5Z)-7-Oxozeaenol	GNE-317 + Doxorubicin
CRA001160	8	T11	Low	Torin 2 + Sepantronium bromide	Thapsigargin + Sepantronium bromide	Obatoclax Mesylate + Sepantronium bromide	Thapsigargin + Torin 2	Obatoclax Mesylate + Torin 2	Obatoclax Mesylate + Thapsigargin	Enzastaurin + Elesclomol	CPI-613 + Elesclomol	CPI-613 + Enzastaurin	NSC-207895 + Elesclomol	NSC-207895 + Enzastaurin	NSC-207895 + CPI-613	Selumetinib + I-BET-762	XMD8-92 + I-BET-762	XMD8-92 + Selumetinib	KIN001-266 + I-BET-762	KIN001-266 + Selumetinib	KIN001-266 + XMD8-92	AZD6482 + Refametinib	Shikonin + Refametinib	Shikonin + AZD6482	WYE-125132 + Refametinib	WYE-125132 + AZD6482	WYE-125132 + Shikonin	Apitolisib + Gemcitabine	Dacinostat + Gemcitabine	Dacinostat + Apitolisib	Trametinib + Gemcitabine	Trametinib + Apitolisib	Trametinib + Dacinostat	GSK1059615 + IMD-0354	(5Z)-7-Oxozeaenol + IMD-0354	Luminespib + IMD-0354	(5Z)-7-Oxozeaenol + GSK1059615	Luminespib + GSK1059615	Luminespib + (5Z)-7-Oxozeaenol	Mitomycin-C + (5Z)-7-Oxozeaenol	Bleomycin (50 uM) + (5Z)-7-Oxozeaenol	Doxorubicin + (5Z)-7-Oxozeaenol	Bleomycin (50 uM) + Mitomycin-C	GNE-317 + (5Z)-7-Oxozeaenol	Epothilone B + (5Z)-7-Oxozeaenol	Doxorubicin + Mitomycin-C	JNK-9L + (5Z)-7-Oxozeaenol	Doxorubicin + Bleomycin (50 uM)	Sabutoclax + (5Z)-7-Oxozeaenol
CRA001160	9	T12	Middle	5109870	pararosaniline	gossypol	ciclopirox	trifluridine	emetine	puromycin	cicloheximide	SB-203580	MG-132	etoposide	resveratrol	anisomycin	niclosamide	phenelzine	pyrvinium	lycorine	(+)-chelidonine	mifepristone	etacrynic acid	mepenzolate bromide	hydrastinine	menadione	benfotiamine	piribedil	clomipramine	pimozide	ticarcillin	mesalazine	pivampicillin	mepacrine	iopanoic acid	lysergol	rottlerin	flunixin	azacitidine	ambroxol	naftifine	ticlopidine	clioquinol	metoclopramide	8-azaguanine	nimesulide	carbinoxamine	tacrine	piperidolate
CRA001160	10	T13	Low	Torin 2 + Sepantronium bromide	Trametinib + Sepantronium bromide	Thapsigargin + Sepantronium bromide	Trametinib + Torin 2	Thapsigargin + Torin 2	Thapsigargin + Trametinib	Shikonin + Obatoclax Mesylate	WYE-125132 + Obatoclax Mesylate	Gemcitabine + Obatoclax Mesylate	WYE-125132 + Shikonin	Gemcitabine + Shikonin	Gemcitabine + WYE-125132	Dacinostat + Apitolisib	IMD-0354 + Apitolisib	IMD-0354 + Dacinostat	GSK1059615 + Apitolisib	GSK1059615 + Dacinostat	GSK1059615 + IMD-0354	(5Z)-7-Oxozeaenol + Panobinostat	Belinostat + Panobinostat	DMOG + Panobinostat	Belinostat + (5Z)-7-Oxozeaenol	DMOG + (5Z)-7-Oxozeaenol	Luminespib + (5Z)-7-Oxozeaenol	DMOG + Belinostat	Mitomycin-C + (5Z)-7-Oxozeaenol	Mitomycin-C + Luminespib	Bleomycin (50 uM) + (5Z)-7-Oxozeaenol	Bleomycin (50 uM) + Luminespib	Doxorubicin + (5Z)-7-Oxozeaenol	Bleomycin (50 uM) + Mitomycin-C	GNE-317 + (5Z)-7-Oxozeaenol	Epothilone B + (5Z)-7-Oxozeaenol	AT-7519 + (5Z)-7-Oxozeaenol	PI-103 + (5Z)-7-Oxozeaenol	CUDC-101 + (5Z)-7-Oxozeaenol	JNK-9L + (5Z)-7-Oxozeaenol	Flavopiridol + (5Z)-7-Oxozeaenol	Sabutoclax + (5Z)-7-Oxozeaenol	Trichostatin A + (5Z)-7-Oxozeaenol	ICL1100013 + (5Z)-7-Oxozeaenol	CAY10603 + (5Z)-7-Oxozeaenol	Etoposide + (5Z)-7-Oxozeaenol	SNX-2112 + (5Z)-7-Oxozeaenol	Dinaciclib + (5Z)-7-Oxozeaenol	GNE-317 + Doxorubicin
CRA001160	11	T15	Middle	ivermectin	emetine	5109870	ciclosporin	MG-132	thapsigargin	gossypol	pimozide	tyrphostin AG-1478	clotrimazole	prenylamine	azacitidine	clioquinol	cephaeline	anisomycin	cicloheximide	mefloquine	rottlerin	puromycin	clomifene	chrysin	vitexin	pridinol	hexestrol	monobenzone	estriol	mesalazine	resveratrol	alpha-estradiol	clobetasol	fendiline	astemizole	saquinavir	suloctidil	pyrvinium	trimipramine	protriptyline	trifluoperazine	liothyronine	abamectin	propofol	pizotifen	ionomycin	chlorcyclizine	fluphenazine	chlorhexidine
CRA001160	12	T16	Low	Daporinad + Sepantronium bromide	Thapsigargin + Sepantronium bromide	Obatoclax Mesylate + Sepantronium bromide	Thapsigargin + Daporinad	Obatoclax Mesylate + Daporinad	Obatoclax Mesylate + Thapsigargin	GSK1070916 + Belinostat	JNK-9L + Belinostat	THZ-2-49 + Belinostat	JNK-9L + GSK1070916	THZ-2-49 + GSK1070916	THZ-2-49 + JNK-9L	CAY10603 + Mitomycin-C	Bleomycin + Mitomycin-C	ZSTK474 + Mitomycin-C	Bleomycin + CAY10603	ZSTK474 + CAY10603	ZSTK474 + Bleomycin	AZD7762 + Vinblastine	DMOG + Vinblastine	DMOG + AZD7762	SNX-2112 + Vinblastine	SNX-2112 + AZD7762	SNX-2112 + DMOG	Panobinostat + AT-7519	AR-42 + AT-7519	Dacinostat + AT-7519	AR-42 + Panobinostat	Dacinostat + Panobinostat	Dacinostat + AR-42	Pictilisib + Lestaurtinib	Shikonin + Lestaurtinib	Foretinib + Lestaurtinib	Shikonin + Pictilisib	Foretinib + Pictilisib	Foretinib + Shikonin	Cytarabine + Docetaxel	FH535 + Docetaxel	FH535 + Cytarabine	YK-4-279 + Docetaxel	YK-4-279 + Cytarabine	YK-4-279 + FH535	Trichostatin A + BMS-754807	Doxorubicin + BMS-754807	Phenformin + BMS-754807	Doxorubicin + Trichostatin A
CRA001160	13	T17	Low	Thapsigargin + Sepantronium bromide	Trametinib + Sepantronium bromide	Trametinib + Thapsigargin	Belinostat + Sepantronium bromide	Belinostat + Thapsigargin	Belinostat + Trametinib	CAY10603 + Panobinostat	Dacinostat + Panobinostat	SNX-2112 + Panobinostat	Dacinostat + CAY10603	SNX-2112 + CAY10603	SNX-2112 + Dacinostat	Daporinad + Torin 2	Vincristine + Torin 2	Vincristine + Daporinad	Obatoclax Mesylate + Torin 2	Obatoclax Mesylate + Daporinad	Obatoclax Mesylate + Vincristine	QL-VIII-58 + Dinaciclib	Bleomycin (50 uM) + Dinaciclib	Bleomycin (50 uM) + QL-VIII-58	Mitomycin-C + Dinaciclib	Mitomycin-C + QL-VIII-58	Mitomycin-C + Bleomycin (50 uM)	CUDC-101 + Tipifarnib	Vinblastine + Tipifarnib	Vinblastine + CUDC-101	FH535 + Tipifarnib	FH535 + CUDC-101	FH535 + Vinblastine	AR-42 + JNK-9L	IMD-0354 + JNK-9L	Telomerase Inhibitor IX + JNK-9L	IMD-0354 + AR-42	Telomerase Inhibitor IX + AR-42	Telomerase Inhibitor IX + IMD-0354	AT-7519 + Luminespib	ACY-1215 + Luminespib	MK-1775 + Luminespib	ACY-1215 + AT-7519	MK-1775 + AT-7519	MK-1775 + ACY-1215	SN-38 + PD0325901	WYE-125132 + PD0325901	WYE-125132 + SN-38	Epothilone B + PD0325901
CRA001160	14	T19	Low	Flavopiridol + Dactolisib	Tanespimycin + Dactolisib	Amuvatinib + Dactolisib	Tanespimycin + Flavopiridol	Amuvatinib + Flavopiridol	Amuvatinib + Tanespimycin	PF-4708671 + JNJ38877605	SB52334 + JNJ38877605	SB52334 + PF-4708671	Sepantronium bromide + JNJ38877605	Sepantronium bromide + PF-4708671	Sepantronium bromide + SB52334	ZSTK474 + GSK1070916	Pictilisib + GSK1070916	THZ-2-49 + GSK1070916	Pictilisib + ZSTK474	THZ-2-49 + ZSTK474	THZ-2-49 + Pictilisib	Gemcitabine + Doxorubicin	AICA Ribonucleotide + Doxorubicin	ZM447439 + Doxorubicin	AICA Ribonucleotide + Gemcitabine	ZM447439 + Gemcitabine	ZM447439 + AICA Ribonucleotide	Bosutinib + BMS-754807	Thapsigargin + BMS-754807	Thapsigargin + Bosutinib	JNK Inhibitor VIII + BMS-754807	JNK Inhibitor VIII + Bosutinib	JNK Inhibitor VIII + Thapsigargin	SL0101 + FTI-277	Etoposide + FTI-277	Etoposide + SL0101	Selumetinib + FTI-277	Selumetinib + SL0101	Selumetinib + Etoposide	Cabozantinib + RO-3306	Doramapimod + RO-3306	Doramapimod + Cabozantinib	Axitinib + RO-3306	Axitinib + Cabozantinib	Axitinib + Doramapimod	KIN001-042 + ETP-45835	Rucaparib + ETP-45835	Rucaparib + KIN001-042	Vincristine + ETP-45835
CRA001160	15	T21	Low	Thapsigargin + Sepantronium bromide	Trametinib + Sepantronium bromide	Trametinib + Thapsigargin	Belinostat + Sepantronium bromide	Belinostat + Thapsigargin	Belinostat + Trametinib	CAY10603 + Panobinostat	Dacinostat + Panobinostat	SNX-2112 + Panobinostat	Dacinostat + CAY10603	SNX-2112 + CAY10603	SNX-2112 + Dacinostat	Daporinad + Torin 2	Vincristine + Torin 2	Vincristine + Daporinad	Obatoclax Mesylate + Torin 2	Obatoclax Mesylate + Daporinad	Obatoclax Mesylate + Vincristine	QL-VIII-58 + Dinaciclib	Bleomycin (50 uM) + Dinaciclib	Bleomycin (50 uM) + QL-VIII-58	Mitomycin-C + Dinaciclib	Mitomycin-C + QL-VIII-58	Mitomycin-C + Bleomycin (50 uM)	CUDC-101 + Tipifarnib	Vinblastine + Tipifarnib	Vinblastine + CUDC-101	FH535 + Tipifarnib	FH535 + CUDC-101	FH535 + Vinblastine	AR-42 + JNK-9L	IMD-0354 + JNK-9L	Telomerase Inhibitor IX + JNK-9L	IMD-0354 + AR-42	Telomerase Inhibitor IX + AR-42	Telomerase Inhibitor IX + IMD-0354	AT-7519 + Luminespib	ACY-1215 + Luminespib	MK-1775 + Luminespib	ACY-1215 + AT-7519	MK-1775 + AT-7519	MK-1775 + ACY-1215	SN-38 + PD0325901	WYE-125132 + PD0325901	WYE-125132 + SN-38	Epothilone B + PD0325901
CRA001160	16	T23	Middle	emetine	PHA-00846566E	cicloheximide	cephaeline	piperidolate	dequalinium chloride	anisomycin	betahistine	acetylsalicylic acid	(+)-chelidonine	mesalazine	nimesulide	chlortetracycline	ciclacillin	Prestwick-1080	imidurea	cimetidine	mimosine	santonin	podophyllotoxin	zoxazolamine	tetryzoline	cefalotin	chlorzoxazone	flunixin	adrenosterone	pargyline	5252917	iodixanol	dyclonine	etynodiol	chenodeoxycholic acid	PNU-0251126	betulinic acid	meteneprost	zidovudine	mycophenolic acid	chloropyramine	ketotifen	metolazone	naringenin	5155877	thiamine	butyl hydroxybenzoate	equilin	megestrol
CRA001160	17	T24	Low	Torin 2 + Sepantronium bromide	Trametinib + Sepantronium bromide	Thapsigargin + Sepantronium bromide	Trametinib + Torin 2	Thapsigargin + Torin 2	Thapsigargin + Trametinib	Shikonin + Obatoclax Mesylate	WYE-125132 + Obatoclax Mesylate	Gemcitabine + Obatoclax Mesylate	WYE-125132 + Shikonin	Gemcitabine + Shikonin	Gemcitabine + WYE-125132	Dacinostat + Apitolisib	IMD-0354 + Apitolisib	IMD-0354 + Dacinostat	GSK1059615 + Apitolisib	GSK1059615 + Dacinostat	GSK1059615 + IMD-0354	(5Z)-7-Oxozeaenol + Panobinostat	Belinostat + Panobinostat	DMOG + Panobinostat	Belinostat + (5Z)-7-Oxozeaenol	DMOG + (5Z)-7-Oxozeaenol	Luminespib + (5Z)-7-Oxozeaenol	DMOG + Belinostat	Mitomycin-C + (5Z)-7-Oxozeaenol	Mitomycin-C + Luminespib	Bleomycin (50 uM) + (5Z)-7-Oxozeaenol	Bleomycin (50 uM) + Luminespib	Doxorubicin + (5Z)-7-Oxozeaenol	Bleomycin (50 uM) + Mitomycin-C	GNE-317 + (5Z)-7-Oxozeaenol	Epothilone B + (5Z)-7-Oxozeaenol	AT-7519 + (5Z)-7-Oxozeaenol	PI-103 + (5Z)-7-Oxozeaenol	CUDC-101 + (5Z)-7-Oxozeaenol	JNK-9L + (5Z)-7-Oxozeaenol	Flavopiridol + (5Z)-7-Oxozeaenol	Sabutoclax + (5Z)-7-Oxozeaenol	Trichostatin A + (5Z)-7-Oxozeaenol	ICL1100013 + (5Z)-7-Oxozeaenol	CAY10603 + (5Z)-7-Oxozeaenol	Etoposide + (5Z)-7-Oxozeaenol	SNX-2112 + (5Z)-7-Oxozeaenol	Dinaciclib + (5Z)-7-Oxozeaenol	GNE-317 + Doxorubicin
CRA001160	19	T3	Middle	cantharidin	celastrol	emetine	nifedipine	15-delta prostaglandin J2	5109870	ciclosporin	puromycin	spiperone	niclosamide	gossypol	azacyclonol	tretinoin	cyproheptadine	felodipine	menadione	phenoxybenzamine	reserpine	pimozide	cephaeline	miconazole	loperamide	clioquinol	prenylamine	cicloheximide	MG-132	oxybutynin	fluspirilene	thapsigargin	pararosaniline	mifepristone	calmidazolium	ebselen	hexestrol	talampicillin	anisomycin	trimipramine	BCB000039	withaferin A	nortriptyline	isotretinoin	pyrvinium	SC-58125	etacrynic acid	norcyclobenzaprine	parthenolide
CRA001160	20	T18	Low	Panobinostat + Trametinib	OSI-027 + Trametinib	Obatoclax Mesylate + Trametinib	OSI-027 + Panobinostat	Obatoclax Mesylate + Panobinostat	Obatoclax Mesylate + OSI-027	JNK-9L + Shikonin	Phenformin + Shikonin	Phenformin + JNK-9L	FH535 + Shikonin	FH535 + JNK-9L	FH535 + Phenformin	SN-38 + QL-XII-47	DMOG + QL-XII-47	Trichostatin A + QL-XII-47	DMOG + SN-38	Trichostatin A + SN-38	Trichostatin A + DMOG	Belinostat + Bleomycin	AR-42 + Bleomycin	AR-42 + Belinostat	Dinaciclib + Bleomycin	Dinaciclib + Belinostat	Dinaciclib + AR-42	Palbociclib + Enzastaurin	AZD7762 + Enzastaurin	Afatinib + Enzastaurin	AZD7762 + Palbociclib	Afatinib + Palbociclib	Afatinib + AZD7762	Tipifarnib + QL-X-138	GNE-317 + QL-X-138	GNE-317 + Tipifarnib	Refametinib + QL-X-138	Refametinib + Tipifarnib	Refametinib + GNE-317	ACY-1215 + MK-1775	MK-2206 + MK-1775	MK-2206 + ACY-1215	Gemcitabine + MK-1775	Gemcitabine + ACY-1215	Gemcitabine + MK-2206	OSU-03012 + JW-7-24-1	Epothilone B + JW-7-24-1	JQ1 + JW-7-24-1	Epothilone B + OSU-03012
CRA001160	21	T20	Low	Daporinad + Sepantronium bromide	Thapsigargin + Sepantronium bromide	Obatoclax Mesylate + Sepantronium bromide	Thapsigargin + Daporinad	Obatoclax Mesylate + Daporinad	Obatoclax Mesylate + Thapsigargin	GSK1070916 + Belinostat	JNK-9L + Belinostat	THZ-2-49 + Belinostat	JNK-9L + GSK1070916	THZ-2-49 + GSK1070916	THZ-2-49 + JNK-9L	CAY10603 + Mitomycin-C	Bleomycin + Mitomycin-C	ZSTK474 + Mitomycin-C	Bleomycin + CAY10603	ZSTK474 + CAY10603	ZSTK474 + Bleomycin	AZD7762 + Vinblastine	DMOG + Vinblastine	DMOG + AZD7762	SNX-2112 + Vinblastine	SNX-2112 + AZD7762	SNX-2112 + DMOG	Panobinostat + AT-7519	AR-42 + AT-7519	Dacinostat + AT-7519	AR-42 + Panobinostat	Dacinostat + Panobinostat	Dacinostat + AR-42	Pictilisib + Lestaurtinib	Shikonin + Lestaurtinib	Foretinib + Lestaurtinib	Shikonin + Pictilisib	Foretinib + Pictilisib	Foretinib + Shikonin	Cytarabine + Docetaxel	FH535 + Docetaxel	FH535 + Cytarabine	YK-4-279 + Docetaxel	YK-4-279 + Cytarabine	YK-4-279 + FH535	Trichostatin A + BMS-754807	Doxorubicin + BMS-754807	Phenformin + BMS-754807	Doxorubicin + Trichostatin A
CRA001160	22	T22	Middle	4,5-dianilinophthalimide	exisulind	5109870	MG-132	gossypol	piribedil	cephaeline	ciclosporin	emetine	spiperone	protriptyline	pridinol	resveratrol	ivermectin	ciclopirox	cicloheximide	abamectin	mebendazole	azacyclonol	puromycin	pentolonium	trimethylcolchicinic acid	levothyroxine sodium	fenbendazole	monobenzone	amoxapine	nefopam	fluorometholone	pizotifen	Prestwick-642	drofenine	etoposide	anisomycin	naftifine	clotrimazole	chloropyramine	mefexamide	esculetin	thiamazole	liothyronine	protoveratrine A	testosterone	carisoprodol	podophyllotoxin	Prestwick-1100	Prestwick-692
CRA001160	23	T14	Low	Torin 2 + THZ-2-102-1	Sepantronium bromide + THZ-2-102-1	Mitomycin-C + THZ-2-102-1	Sepantronium bromide + Torin 2	Mitomycin-C + Torin 2	Mitomycin-C + Sepantronium bromide	Bleomycin + QL-VIII-58	Thapsigargin + QL-VIII-58	Shikonin + QL-VIII-58	Thapsigargin + Bleomycin	Shikonin + Bleomycin	Shikonin + Thapsigargin	WYE-125132 + WZ3105	Belinostat + WZ3105	Belinostat + WYE-125132	IMD-0354 + WZ3105	IMD-0354 + WYE-125132	IMD-0354 + Belinostat	GSK1059615 + Apitolisib	Dacinostat + Apitolisib	Dacinostat + GSK1059615	Omipalisib + Apitolisib	Omipalisib + GSK1059615	Omipalisib + Dacinostat	Luminespib + Dinaciclib	CAY10603 + Dinaciclib	CAY10603 + Luminespib	CUDC-101 + Dinaciclib	CUDC-101 + Luminespib	CUDC-101 + CAY10603	FH535 + Sabutoclax	ARRY-520 + Sabutoclax	ARRY-520 + FH535	Tipifarnib + Sabutoclax	Tipifarnib + FH535	Tipifarnib + ARRY-520	AR-42 + TW 37	THZ-2-49 + TW 37	THZ-2-49 + AR-42	PI-103 + TW 37	PI-103 + AR-42	PI-103 + THZ-2-49	Flavopiridol + Pelitinib	Panobinostat + Pelitinib	PD0325901 + Pelitinib	Panobinostat + Flavopiridol
GSE103322	1	HN26	Low	Dactinomycin + GSK1059615	QL-VIII-58 + GSK1059615	ZSTK474 + GSK1059615	QL-VIII-58 + Dactinomycin	ZSTK474 + Dactinomycin	ZSTK474 + QL-VIII-58	Sepantronium bromide + AST-1306	PF-00299804 + AST-1306	Tanespimycin + AST-1306	PF-00299804 + Sepantronium bromide	Tanespimycin + Sepantronium bromide	Tanespimycin + PF-00299804	AT13148 + ICL1100013	WYE-125132 + ICL1100013	BI-2536 + ICL1100013	WYE-125132 + AT13148	BI-2536 + AT13148	BI-2536 + WYE-125132	Y-39983 + QS11	GSK429286A + QS11	P22077 + QS11	GSK429286A + Y-39983	P22077 + Y-39983	P22077 + GSK429286A	GSK591 + WIKI4	BIBR-1532 + WIKI4	Ribociclib + WIKI4	BIBR-1532 + GSK591	Ribociclib + GSK591	Ribociclib + BIBR-1532	MIRA-1 + AMG-319	EPZ5676 + AMG-319	EPZ5676 + MIRA-1	Cetuximab + AMG-319	Cetuximab + MIRA-1	Cetuximab + EPZ5676	Shikonin + Belinostat	SNX-2112 + Belinostat	QL-XII-47 + Belinostat	SNX-2112 + Shikonin	QL-XII-47 + Shikonin	QL-XII-47 + SNX-2112	Torin 2 + QL-X-138	(5Z)-7-Oxozeaenol + QL-X-138	(5Z)-7-Oxozeaenol + Torin 2	TWS119 + QL-X-138
GSE103322	2	HNSCC26	Low	Sepantronium bromide + Torin 2	Apitolisib + Torin 2	Obatoclax Mesylate + Torin 2	Apitolisib + Sepantronium bromide	Obatoclax Mesylate + Sepantronium bromide	Obatoclax Mesylate + Apitolisib	Belinostat + Mitomycin-C	Panobinostat + Mitomycin-C	HG6-64-1 + Mitomycin-C	Panobinostat + Belinostat	HG6-64-1 + Belinostat	HG6-64-1 + Panobinostat	Gemcitabine + Bortezomib	DMOG + Bortezomib	GNE-317 + Bortezomib	DMOG + Gemcitabine	GNE-317 + Gemcitabine	GNE-317 + DMOG	MK-1775 + JNK-9L	CPI-613 + JNK-9L	Topotecan + JNK-9L	CPI-613 + MK-1775	Topotecan + MK-1775	Topotecan + CPI-613	OSI-027 + CGP-60474	Dasatinib + CGP-60474	AZD8186 + CGP-60474	Dasatinib + OSI-027	AZD8186 + OSI-027	AZD8186 + Dasatinib	TPCA-1 + Epothilone B	Tipifarnib + Epothilone B	JW-7-24-1 + Epothilone B	Tipifarnib + TPCA-1	JW-7-24-1 + TPCA-1	JW-7-24-1 + Tipifarnib	OSU-03012 + PI-103	Ulixertinib + PI-103	PRIMA-1MET + PI-103	Ulixertinib + OSU-03012	PRIMA-1MET + OSU-03012	PRIMA-1MET + Ulixertinib	NG-25 + WEHI-539	BMS-536924 + WEHI-539	BMS-536924 + NG-25	Linsitinib + WEHI-539
GSE103322	4	HNSCC22	Low	Torin 2 + THZ-2-102-1	Sepantronium bromide + THZ-2-102-1	Mitomycin-C + THZ-2-102-1	Sepantronium bromide + Torin 2	Mitomycin-C + Torin 2	Mitomycin-C + Sepantronium bromide	Bleomycin + QL-VIII-58	Thapsigargin + QL-VIII-58	Shikonin + QL-VIII-58	Thapsigargin + Bleomycin	Shikonin + Bleomycin	Shikonin + Thapsigargin	WYE-125132 + WZ3105	Belinostat + WZ3105	Belinostat + WYE-125132	IMD-0354 + WZ3105	IMD-0354 + WYE-125132	IMD-0354 + Belinostat	GSK1059615 + Apitolisib	Dacinostat + Apitolisib	Dacinostat + GSK1059615	Omipalisib + Apitolisib	Omipalisib + GSK1059615	Omipalisib + Dacinostat	Luminespib + Dinaciclib	CAY10603 + Dinaciclib	CAY10603 + Luminespib	CUDC-101 + Dinaciclib	CUDC-101 + Luminespib	CUDC-101 + CAY10603	FH535 + Sabutoclax	ARRY-520 + Sabutoclax	ARRY-520 + FH535	Tipifarnib + Sabutoclax	Tipifarnib + FH535	Tipifarnib + ARRY-520	AR-42 + TW 37	THZ-2-49 + TW 37	THZ-2-49 + AR-42	PI-103 + TW 37	PI-103 + AR-42	PI-103 + THZ-2-49	Flavopiridol + Pelitinib	Panobinostat + Pelitinib	PD0325901 + Pelitinib	Panobinostat + Flavopiridol
GSE103322	6	HNSCC18	Middle	cytisine	fluvastatin	succinylsulfathiazole	gabexate	phenylpropanolamine	iopromide	trimethadione	zuclopenthixol	minaprine	xylometazoline	midodrine	naftopidil	canadine	hydrocortisone	tetracaine	etacrynic acid	methacholine chloride	tolazoline	amoxapine	sulfaguanidine	zalcitabine	lisinopril	pancuronium bromide	quipazine	sulfametoxydiazine	methanthelinium bromide	cefoxitin	boldine	lithocholic acid	ozagrel	etiocholanolone	reserpine	benfluorex	saquinavir	tetramisole	methyldopa	vanoxerine	xylazine	piperidolate	biotin	testosterone	5224221	hydroxyachillin	amiprilose	acetylsalicylsalicylic acid	phenformin
GSE103322	7	HNSCC9	Middle	pimozide	albendazole	cinchocaine	cefapirin	ornidazole	gliclazide	kaempferol	paromomycin	midodrine	dyclonine	glibenclamide	alpha-yohimbine	amylocaine	dicloxacillin	gabapentin	cefaclor	fluticasone
GSE103322	8	HNSCC12	Middle	cefapirin	cinchocaine	albendazole	orphenadrine	paromomycin	S-propranolol	difenidol	etodolac	alpha-yohimbine	dropropizine	budesonide	doxepin
GSE103322	9	HNSCC5	Low	Apitolisib + Thapsigargin	Panobinostat + Thapsigargin	Panobinostat + Apitolisib	Obatoclax Mesylate + Thapsigargin	Obatoclax Mesylate + Apitolisib	Obatoclax Mesylate + Panobinostat	IMD-0354 + Mitomycin-C	Dacinostat + Mitomycin-C	Belinostat + Mitomycin-C	Dacinostat + IMD-0354	Belinostat + IMD-0354	Belinostat + Dacinostat	Sepantronium bromide + Shikonin	Daporinad + Shikonin	Daporinad + Sepantronium bromide	AT-7519 + Shikonin	AT-7519 + Sepantronium bromide	AT-7519 + Daporinad	AR-42 + ZSTK474	DMOG + ZSTK474	DMOG + AR-42	PI-103 + ZSTK474	PI-103 + AR-42	PI-103 + DMOG	Sabutoclax + CUDC-101	Trichostatin A + CUDC-101	Trichostatin A + Sabutoclax	GSK1059615 + CUDC-101	GSK1059615 + Sabutoclax	GSK1059615 + Trichostatin A	QL-X-138 + Vincristine	Vorinostat + Vincristine	CD532 + Vincristine	Vorinostat + QL-X-138	CD532 + QL-X-138	CD532 + Vorinostat	Temsirolimus + CAY10603	PF-00299804 + CAY10603	ACY-1215 + CAY10603	PF-00299804 + Temsirolimus	ACY-1215 + Temsirolimus	ACY-1215 + PF-00299804	QL-XII-47 + Flavopiridol	AST-1306 + Flavopiridol	Mirin + Flavopiridol	AST-1306 + QL-XII-47
GSE103322	10	HNSCC6	Low	HG-5-113-01 + PF-00299804	Amuvatinib + PF-00299804	Amuvatinib + HG-5-113-01	Tenovin-6 + PF-00299804	Tenovin-6 + HG-5-113-01	Tenovin-6 + Amuvatinib	Pilaralisib + Vinorelbine	Selumetinib + Vinorelbine	Selumetinib + Pilaralisib	PF-4708671 + Vinorelbine	PF-4708671 + Pilaralisib	PF-4708671 + Selumetinib	Torin 2 + LCL161	QL-VIII-58 + LCL161	QL-VIII-58 + Torin 2	Trametinib + LCL161	Trametinib + Torin 2	Trametinib + QL-VIII-58	Thapsigargin + Sepantronium bromide	Vincristine + Sepantronium bromide	Shikonin + Sepantronium bromide	Vincristine + Thapsigargin	Shikonin + Thapsigargin	Shikonin + Vincristine	Obatoclax Mesylate + Dactolisib	Dacinostat + Dactolisib	WYE-125132 + Dactolisib	Dacinostat + Obatoclax Mesylate	WYE-125132 + Obatoclax Mesylate	WYE-125132 + Dacinostat	Apitolisib + PD0325901	GSK1059615 + PD0325901	GSK1059615 + Apitolisib	WZ3105 + PD0325901	WZ3105 + Apitolisib	WZ3105 + GSK1059615	Midostaurin + Elesclomol	MK-1775 + Elesclomol	MK-1775 + Midostaurin	DMOG + Elesclomol	DMOG + Midostaurin	DMOG + MK-1775	Pelitinib + Mitomycin-C	PAC-1 + Mitomycin-C	PAC-1 + Pelitinib	KIN001-266 + Mitomycin-C
GSE103322	11	HNSCC20	Low	QL-VIII-58 + Sepantronium bromide	ZSTK474 + Sepantronium bromide	Belinostat + Sepantronium bromide	ZSTK474 + QL-VIII-58	Belinostat + QL-VIII-58	Belinostat + ZSTK474	AR-42 + CAY10603	AT-7519 + CAY10603	Panobinostat + CAY10603	AT-7519 + AR-42	Panobinostat + AR-42	Panobinostat + AT-7519	Flavopiridol + CUDC-101	GSK1070916 + CUDC-101	QL-X-138 + CUDC-101	GSK1070916 + Flavopiridol	QL-X-138 + Flavopiridol	QL-X-138 + GSK1070916	PHA-793887 + Tanespimycin	PI-103 + Tanespimycin	WYE-125132 + Tanespimycin	PI-103 + PHA-793887	WYE-125132 + PHA-793887	WYE-125132 + PI-103	Docetaxel + OSI-027	UNC0638 + OSI-027	CP466722 + OSI-027	UNC0638 + Docetaxel	CP466722 + Docetaxel	CP466722 + UNC0638	LDN-193189 + HG-5-113-01	Trichostatin A + HG-5-113-01	Trichostatin A + LDN-193189	kb NB 142-70 + HG-5-113-01	kb NB 142-70 + LDN-193189	kb NB 142-70 + Trichostatin A	HG-5-88-01 + YK-4-279	AZD8055 + YK-4-279	AZD8055 + HG-5-88-01	QS11 + YK-4-279	QS11 + HG-5-88-01	QS11 + AZD8055	ZM447439 + MIM1	PF-562271 + MIM1	BX795 + MIM1	PF-562271 + ZM447439
GSE115978	1	Mel79	Middle	15-delta prostaglandin J2	5109870	phenoxybenzamine	gossypol	pyrimethamine	ciclosporin	niclosamide	ciclopirox	resveratrol	monobenzone	spiperone	clotrimazole	antimycin A	etacrynic acid	emetine	cantharidin	0173570-0000	8-azaguanine	nortriptyline	cyproheptadine	puromycin	STOCK1N-35215	valinomycin	erastin	glibenclamide	0297417-0002B	econazole	cloperastine	etoposide	mesalazine	nifedipine	astemizole	thioridazine	celastrol	semustine	esculetin	prenylamine	thiostrepton	pizotifen	menadione	5155877	thioguanosine	nicergoline	fluorometholone	methotrexate	piperlongumine
GSE115978	3	Mel88	Low	Torin 2 + Sepantronium bromide	Gemcitabine + Sepantronium bromide	Thapsigargin + Sepantronium bromide	Gemcitabine + Torin 2	Thapsigargin + Torin 2	Thapsigargin + Gemcitabine	Vincristine + Mitomycin-C	OSI-027 + Mitomycin-C	Obatoclax Mesylate + Mitomycin-C	OSI-027 + Vincristine	Obatoclax Mesylate + Vincristine	Obatoclax Mesylate + OSI-027	Vinblastine + IMD-0354	Bleomycin + IMD-0354	PI-103 + IMD-0354	Bleomycin + Vinblastine	PI-103 + Vinblastine	PI-103 + Bleomycin	CAY10603 + Apitolisib	Epothilone B + Apitolisib	Epothilone B + CAY10603	Panobinostat + Apitolisib	Panobinostat + CAY10603	Panobinostat + Epothilone B	Dacinostat + Dinaciclib	AT-7519 + Dinaciclib	Docetaxel + Dinaciclib	AT-7519 + Dacinostat	Docetaxel + Dacinostat	Docetaxel + AT-7519	CUDC-101 + SN-38	DMOG + SN-38	Foretinib + SN-38	DMOG + CUDC-101	Foretinib + CUDC-101	Foretinib + DMOG	Flavopiridol + Sabutoclax	AR-42 + Sabutoclax	AR-42 + Flavopiridol	Lestaurtinib + Sabutoclax	Lestaurtinib + Flavopiridol	Lestaurtinib + AR-42	MK-1775 + Phenformin	THZ-2-49 + Phenformin	Topotecan + Phenformin	THZ-2-49 + MK-1775
GSE115978	4	Mel81	Low	Sepantronium bromide + QL-VIII-58	ZSTK474 + QL-VIII-58	Temsirolimus + QL-VIII-58	ZSTK474 + Sepantronium bromide	Temsirolimus + Sepantronium bromide	Temsirolimus + ZSTK474	Teniposide + (5Z)-7-Oxozeaenol	Mitoxantrone + (5Z)-7-Oxozeaenol	Piperlongumine + (5Z)-7-Oxozeaenol	Refametinib + (5Z)-7-Oxozeaenol	PRIMA-1MET + (5Z)-7-Oxozeaenol	Mitoxantrone + Teniposide	Elephantin + (5Z)-7-Oxozeaenol	Piperlongumine + Teniposide	AT13148 + (5Z)-7-Oxozeaenol	GSK1070916 + (5Z)-7-Oxozeaenol	Tanespimycin + (5Z)-7-Oxozeaenol	AZD5582 + (5Z)-7-Oxozeaenol	ICL1100013 + (5Z)-7-Oxozeaenol	Vincristine + (5Z)-7-Oxozeaenol	Cisplatin + (5Z)-7-Oxozeaenol	Piperlongumine + Mitoxantrone	Dactinomycin + (5Z)-7-Oxozeaenol	Niraparib + (5Z)-7-Oxozeaenol	Fludarabine + (5Z)-7-Oxozeaenol	Entospletinib + (5Z)-7-Oxozeaenol	ML323 + (5Z)-7-Oxozeaenol	CZC24832 + (5Z)-7-Oxozeaenol	BIBR-1532 + (5Z)-7-Oxozeaenol	PFI3 + (5Z)-7-Oxozeaenol	MN-64 + (5Z)-7-Oxozeaenol	GSK343 + (5Z)-7-Oxozeaenol	Carmustine + (5Z)-7-Oxozeaenol	LY2109761 + (5Z)-7-Oxozeaenol	IOX2 + (5Z)-7-Oxozeaenol	UNC0642 + (5Z)-7-Oxozeaenol	PRIMA-1MET + Refametinib	Elephantin + Refametinib	Elephantin + PRIMA-1MET	GSK1070916 + AT13148	Tanespimycin + AT13148	Tanespimycin + GSK1070916	ICL1100013 + AZD5582	Vincristine + AZD5582	Vincristine + ICL1100013	Torin 2 + (5Z)-7-Oxozeaenol
GSE115978	5	Mel102	Low	Thapsigargin + Obatoclax Mesylate	NSC319726 + Obatoclax Mesylate	NSC319726 + Thapsigargin	Vincristine + Obatoclax Mesylate	Vincristine + Thapsigargin	Vincristine + NSC319726	Etoposide + Epothilone B	Dinaciclib + Epothilone B	WYE-125132 + Epothilone B	Dinaciclib + Etoposide	WYE-125132 + Etoposide	WYE-125132 + Dinaciclib	IMD-0354 + DMOG	SN-38 + DMOG	SN-38 + IMD-0354	Pevonedistat + DMOG	Pevonedistat + IMD-0354	Pevonedistat + SN-38	Tipifarnib + FH535	Telomerase Inhibitor IX + FH535	Telomerase Inhibitor IX + Tipifarnib	Vinorelbine + FH535	Vinorelbine + Tipifarnib	Vinorelbine + Telomerase Inhibitor IX	MK-1775 + Topotecan	GSK1059615 + Topotecan	GSK1059615 + MK-1775	QL-XII-47 + Topotecan	QL-XII-47 + MK-1775	QL-XII-47 + GSK1059615	Bortezomib + Taselisib	CD532 + Taselisib	Podophyllotoxin bromide + Taselisib	CD532 + Bortezomib	Podophyllotoxin bromide + Bortezomib	Podophyllotoxin bromide + CD532	CPI-613 + Camptothecin	JQ12 + Camptothecin	JQ12 + CPI-613	AST-1306 + Camptothecin	AST-1306 + CPI-613	AST-1306 + JQ12	PF-00299804 + AT-7519	CI-1033 + AT-7519	Cediranib + AT-7519	CI-1033 + PF-00299804
GSE115978	6	Mel110	Low	ARRY-520 + Sepantronium bromide	Apitolisib + Sepantronium bromide	Bleomycin (50 uM) + Sepantronium bromide	Apitolisib + ARRY-520	Bleomycin (50 uM) + ARRY-520	Bleomycin (50 uM) + Apitolisib	(5Z)-7-Oxozeaenol + PD0325901	Foretinib + PD0325901	Foretinib + (5Z)-7-Oxozeaenol	Mitoxantrone + PD0325901	Mitoxantrone + (5Z)-7-Oxozeaenol	Elesclomol + (5Z)-7-Oxozeaenol	PF-00299804 + (5Z)-7-Oxozeaenol	BMS-754807 + (5Z)-7-Oxozeaenol	GNE-317 + (5Z)-7-Oxozeaenol	Mitoxantrone + Foretinib	PF-00299804 + Elesclomol	BMS-754807 + Elesclomol	BMS-754807 + PF-00299804	5-Fluorouracil + (5Z)-7-Oxozeaenol	Buparlisib + (5Z)-7-Oxozeaenol	Epirubicin + (5Z)-7-Oxozeaenol	5-Fluorouracil + GNE-317	Buparlisib + GNE-317	Teniposide + (5Z)-7-Oxozeaenol	NG-25 + (5Z)-7-Oxozeaenol	Buparlisib + 5-Fluorouracil	FH535 + (5Z)-7-Oxozeaenol	Doxorubicin + (5Z)-7-Oxozeaenol	QL-XII-47 + (5Z)-7-Oxozeaenol	TL-1-85 + (5Z)-7-Oxozeaenol	AT7867 + (5Z)-7-Oxozeaenol	MPS-1-IN-1 + (5Z)-7-Oxozeaenol	Cediranib + (5Z)-7-Oxozeaenol	Tipifarnib + (5Z)-7-Oxozeaenol	Luminespib + (5Z)-7-Oxozeaenol	AZ628 + (5Z)-7-Oxozeaenol	AZD8055 + (5Z)-7-Oxozeaenol	Paclitaxel + (5Z)-7-Oxozeaenol	WH-4-023 + (5Z)-7-Oxozeaenol	Afuresertib + (5Z)-7-Oxozeaenol	Teniposide + Epirubicin	Taselisib + (5Z)-7-Oxozeaenol	JW-7-52-1 + (5Z)-7-Oxozeaenol	PRIMA-1MET + (5Z)-7-Oxozeaenol	MK-2206 + (5Z)-7-Oxozeaenol
GSE116256	1	AML328	Low	Bleomycin + Torin 2	IMD-0354 + Torin 2	ARRY-520 + Torin 2	IMD-0354 + Bleomycin	ARRY-520 + Bleomycin	ARRY-520 + IMD-0354	CAY10603 + GSK1059615	Thapsigargin + GSK1059615	PI-103 + GSK1059615	Thapsigargin + CAY10603	PI-103 + CAY10603	PI-103 + Thapsigargin	Shikonin + Flavopiridol	Apitolisib + Flavopiridol	Apitolisib + Shikonin	Trichostatin A + Flavopiridol	Trichostatin A + Shikonin	Trichostatin A + Apitolisib	Obatoclax Mesylate + SNX-2112	Doxorubicin + SNX-2112	Doxorubicin + Obatoclax Mesylate	AT-7519 + SNX-2112	AT-7519 + Obatoclax Mesylate	AT-7519 + Doxorubicin	Dacinostat + WYE-125132	ACY-1215 + WYE-125132	Epothilone B + WYE-125132	ACY-1215 + Dacinostat	Epothilone B + Dacinostat	Epothilone B + ACY-1215	QL-XII-47 + Tipifarnib	Foretinib + Tipifarnib	Vorinostat + Tipifarnib	Foretinib + QL-XII-47	Vorinostat + QL-XII-47	Vorinostat + Foretinib	JNK-9L + BMS-754807	CI-1033 + BMS-754807	CI-1033 + JNK-9L	AST-1306 + BMS-754807	AST-1306 + JNK-9L	AST-1306 + CI-1033	AZD7762 + Elesclomol	PF-00299804 + Elesclomol	Lestaurtinib + Elesclomol	PF-00299804 + AZD7762
GSE117570	1	P3	Low	Shikonin + Sepantronium bromide	Gemcitabine + Sepantronium bromide	Dacinostat + Sepantronium bromide	Gemcitabine + Shikonin	Dacinostat + Shikonin	Dacinostat + Gemcitabine	Belinostat + Panobinostat	DMOG + Panobinostat	DMOG + Belinostat	GNE-317 + Panobinostat	GNE-317 + Belinostat	GNE-317 + DMOG	CUDC-101 + AT-7519	Flavopiridol + AT-7519	Sabutoclax + AT-7519	Flavopiridol + CUDC-101	Sabutoclax + CUDC-101	Sabutoclax + Flavopiridol	CAY10603 + Trichostatin A	Etoposide + Trichostatin A	SNX-2112 + Trichostatin A	Etoposide + CAY10603	SNX-2112 + CAY10603	SNX-2112 + Etoposide	Telomerase Inhibitor IX + Dinaciclib	Daporinad + Dinaciclib	Buparlisib + Dinaciclib	Daporinad + Telomerase Inhibitor IX	Buparlisib + Telomerase Inhibitor IX	Buparlisib + Daporinad	AR-42 + CD532	ACY-1215 + CD532	ACY-1215 + AR-42	Bortezomib + CD532	Bortezomib + AR-42	Bortezomib + ACY-1215	AZD6738 + AZD5582	Epirubicin + AZD5582	QL-X-138 + AZD5582	Epirubicin + AZD6738	QL-X-138 + AZD6738	QL-X-138 + Epirubicin	Teniposide + SCH772984	Cediranib + SCH772984	CX-5461 + SCH772984	Cediranib + Teniposide
GSE117570	2	P2	Low	Sepantronium bromide + THZ-2-102-1	Dactinomycin + THZ-2-102-1	(5Z)-7-Oxozeaenol + THZ-2-102-1	Sepantronium bromide + Dactinomycin	Sepantronium bromide + (5Z)-7-Oxozeaenol	(5Z)-7-Oxozeaenol + Dactinomycin	CX-5461 + (5Z)-7-Oxozeaenol	CD532 + (5Z)-7-Oxozeaenol	CD532 + CX-5461	AT-7519 + (5Z)-7-Oxozeaenol	AT-7519 + CX-5461	AT-7519 + CD532	(5Z)-7-Oxozeaenol + Torin 2	Pevonedistat + (5Z)-7-Oxozeaenol	Etoposide + (5Z)-7-Oxozeaenol	PFI-1 + (5Z)-7-Oxozeaenol	Ispinesib Mesylate + (5Z)-7-Oxozeaenol	Pevonedistat + Torin 2	Etoposide + Torin 2	Etoposide + Pevonedistat	Ispinesib Mesylate + PFI-1	GNE-317 + (5Z)-7-Oxozeaenol	GNE-317 + PFI-1	GNE-317 + Ispinesib Mesylate	QL-VIII-58 + (5Z)-7-Oxozeaenol	ABT737 + (5Z)-7-Oxozeaenol	SNX-2112 + (5Z)-7-Oxozeaenol	NVP-ADW742 + (5Z)-7-Oxozeaenol	SB590885 + (5Z)-7-Oxozeaenol	SL0101 + (5Z)-7-Oxozeaenol	I-BRD9 + (5Z)-7-Oxozeaenol	WZ3105 + (5Z)-7-Oxozeaenol	Obatoclax Mesylate + (5Z)-7-Oxozeaenol	ABT737 + QL-VIII-58	SNX-2112 + QL-VIII-58	WYE-125132 + (5Z)-7-Oxozeaenol	IMD-0354 + (5Z)-7-Oxozeaenol	SNX-2112 + ABT737	JW-7-52-1 + (5Z)-7-Oxozeaenol	SB590885 + NVP-ADW742	SL0101 + NVP-ADW742	SL0101 + SB590885	JNK-9L + (5Z)-7-Oxozeaenol	Apitolisib + (5Z)-7-Oxozeaenol	GW843682X + (5Z)-7-Oxozeaenol	Gemcitabine + (5Z)-7-Oxozeaenol
GSE117570	3	P1	Middle	spironolactone	flucytosine	dexibuprofen	pyrimethamine	levcycloserine	monocrotaline	nadolol	oxybuprocaine	guanethidine	fludroxycortide	oxybenzone	dipivefrine	lycorine	ketoconazole	nitrofural	glafenine	estrone
GSE118056	1	patient1	Low	ICL1100013 + Thapsigargin	OF-1 + Thapsigargin	OF-1 + ICL1100013	NSC319726 + Thapsigargin	NSC319726 + ICL1100013	NSC319726 + OF-1	Sepantronium bromide + Bleomycin	SN-38 + Bleomycin	Torin 2 + Bleomycin	Sepantronium bromide + SN-38	Sepantronium bromide + Torin 2	Torin 2 + SN-38	PF-562271 + Daporinad	Topotecan + Daporinad	LCL161 + Daporinad	Topotecan + PF-562271	LCL161 + PF-562271	LCL161 + Topotecan	PD0325901 + Camptothecin	Niraparib + Camptothecin	Niraparib + PD0325901	QL-VIII-58 + Camptothecin	QL-VIII-58 + PD0325901	QL-VIII-58 + Niraparib	Vincristine + Irinotecan	ABT737 + Irinotecan	ABT737 + Vincristine	HG6-64-1 + Irinotecan	HG6-64-1 + Vincristine	HG6-64-1 + ABT737	EPZ004777 + BIBR-1532	GSK650394 + BIBR-1532	GSK650394 + EPZ004777	Doxorubicin + BIBR-1532	Doxorubicin + EPZ004777	Doxorubicin + GSK650394	XMD8-92 + Sabutoclax	Z-LLNle-CHO + Sabutoclax	FH535 + Sabutoclax	Z-LLNle-CHO + XMD8-92	FH535 + XMD8-92	FH535 + Z-LLNle-CHO	AZD5582 + Seliciclib	XMD8-85 + Seliciclib	CMK + Seliciclib	XMD8-85 + AZD5582
GSE123813	1	su001	Middle	calmidazolium	azacyclonol	terfenadine	cantharidin	vanoxerine	suloctidil	prenylamine	pimozide	cephaeline	ebselen	sulconazole	piribedil	deferoxamine	spectinomycin	spiperone	labetalol	pentamidine	practolol	Prestwick-1084	idoxuridine	cimetidine	fluorometholone	trifluoperazine	MG-132	BW-B70C	thioridazine	dienestrol	tyrphostin AG-1478	mefloquine	econazole	menadione	loperamide	tetrandrine	felodipine	chlorprothixene	primaquine	emetine	proadifen	beta-escin	resveratrol	helveticoside	pyrvinium	C-75	lanatoside C	clomipramine	fluspirilene
GSE123813	2	su002	Middle	cantharidin	camptothecin	mepyramine	guanfacine	trichlormethiazide	menadione	chenodeoxycholic acid	rotenone	hexestrol	cefsulodin	methacholine chloride	clioquinol	spiramycin	pentetic acid	ricinine	azacyclonol	protoveratrine A	piperlongumine	beta-escin	esculin	mephenytoin	bepridil	fluspirilene	guaifenesin	chlorzoxazone	tomatidine	8-azaguanine	dienestrol	clindamycin	luteolin	nifenazone	strophanthidin	pipemidic acid	sparteine	pimozide	estriol	anisomycin	spiperone	promazine	aminoglutethimide	propofol	gentamicin	pyridoxine	demecarium bromide	acepromazine	physostigmine
GSE123813	4	su005	Low	calmidazolium	azacyclonol	terfenadine	cantharidin	vanoxerine	suloctidil	prenylamine	pimozide	cephaeline	ebselen	sulconazole	piribedil	deferoxamine	spectinomycin	spiperone	labetalol	pentamidine	practolol	Prestwick-1084	idoxuridine	cimetidine	fluorometholone	trifluoperazine	MG-132	BW-B70C	thioridazine	dienestrol	tyrphostin AG-1478	mefloquine	econazole	menadione	loperamide	tetrandrine	felodipine	chlorprothixene	primaquine	emetine	proadifen	beta-escin	resveratrol	helveticoside	pyrvinium	C-75	lanatoside C	clomipramine	fluspirilene
GSE123813	5	su006	Low	JW-7-52-1 + Sepantronium bromide	NVP-TAE684 + Sepantronium bromide	BMS-509744 + Sepantronium bromide	HG-5-88-01 + Sepantronium bromide	FTI-277 + Sepantronium bromide	Parthenolide + Sepantronium bromide	GSK319347A + Sepantronium bromide	PF-4708671 + Sepantronium bromide	KIN001-042 + Sepantronium bromide	AZD8186 + Sepantronium bromide	Panobinostat + Sepantronium bromide	NVP-TAE684 + JW-7-52-1	BMS-509744 + JW-7-52-1	HG-5-88-01 + JW-7-52-1	FTI-277 + JW-7-52-1	Parthenolide + JW-7-52-1	GSK319347A + JW-7-52-1	PF-4708671 + JW-7-52-1	KIN001-042 + JW-7-52-1	AZD8186 + JW-7-52-1	BMS-509744 + NVP-TAE684	HG-5-88-01 + NVP-TAE684	FTI-277 + NVP-TAE684	Parthenolide + NVP-TAE684	GSK319347A + NVP-TAE684	PF-4708671 + NVP-TAE684	KIN001-042 + NVP-TAE684	AZD8186 + NVP-TAE684	HG-5-88-01 + BMS-509744	CMK + Sepantronium bromide	FTI-277 + BMS-509744	Parthenolide + BMS-509744	GSK319347A + BMS-509744	PF-4708671 + BMS-509744	KIN001-042 + BMS-509744	AZD8186 + BMS-509744	GSK1070916 + Sepantronium bromide	FTI-277 + HG-5-88-01	Panobinostat + JW-7-52-1	Parthenolide + HG-5-88-01	GSK319347A + HG-5-88-01	PF-4708671 + HG-5-88-01	KIN001-042 + HG-5-88-01	AZD8186 + HG-5-88-01	Parthenolide + FTI-277	GSK319347A + FTI-277
GSE123813	6	su008	Middle	suloctidil	azacyclonol	sanguinarine	MS-275	dinoprostone	dextromethorphan	deptropine	ifenprodil	levonorgestrel	terfenadine	trifluoperazine	prochlorperazine	tyrphostin AG-1478	pimozide	strophanthidin	F0447-0125	cantharidin	5155877	rescinnamine	sulfapyridine	sulconazole	protriptyline	clobetasol	troglitazone	resveratrol	labetalol	dexpropranolol	lovastatin	zalcitabine	prednicarbate	Prestwick-1100	beclometasone	rottlerin	artemisinin	valproic acid	alfuzosin	bepridil	medrysone	clomipramine	flumequine	calmidazolium	prednisolone	tolazoline	ketoconazole	helveticoside	primaquine
GSE125449	1	C26	Low	Obatoclax Mesylate + Sepantronium bromide	Mitomycin-C + Sepantronium bromide	Dacinostat + Sepantronium bromide	Mitomycin-C + Obatoclax Mesylate	Dacinostat + Obatoclax Mesylate	Dacinostat + Mitomycin-C	Dinaciclib + Panobinostat	Shikonin + Panobinostat	Shikonin + Dinaciclib	Thapsigargin + Panobinostat	Thapsigargin + Dinaciclib	Thapsigargin + Shikonin	Vincristine + Bleomycin	ACY-1215 + Bleomycin	GW843682X + Bleomycin	ACY-1215 + Vincristine	GW843682X + Vincristine	GW843682X + ACY-1215	Sabutoclax + AZD8055	A-443654 + AZD8055	Trichostatin A + AZD8055	A-443654 + Sabutoclax	Trichostatin A + Sabutoclax	Trichostatin A + A-443654	NVP-TAE684 + PI-103	(5Z)-7-Oxozeaenol + PI-103	Tipifarnib + PI-103	(5Z)-7-Oxozeaenol + NVP-TAE684	Tipifarnib + NVP-TAE684	Tipifarnib + (5Z)-7-Oxozeaenol	S-Trityl-L-cysteine + (5Z)-7-Oxozeaenol	A-770041 + (5Z)-7-Oxozeaenol	CGP-60474 + (5Z)-7-Oxozeaenol	A-770041 + S-Trityl-L-cysteine	Topotecan + (5Z)-7-Oxozeaenol	CGP-60474 + S-Trityl-L-cysteine	CGP-60474 + A-770041	AZ6102 + (5Z)-7-Oxozeaenol	AZ6102 + Topotecan	Z-LLNle-CHO + (5Z)-7-Oxozeaenol	Z-LLNle-CHO + Topotecan	JNK-9L + (5Z)-7-Oxozeaenol	Mitoxantrone + (5Z)-7-Oxozeaenol	Z-LLNle-CHO + AZ6102	MK-1775 + (5Z)-7-Oxozeaenol	GSK1059615 + (5Z)-7-Oxozeaenol
GSE125449	3	C39	Middle	0297417-0002B	alclometasone	Y-27632	Trolox C	myricetin	acetazolamide	fursultiamine	sulfapyridine	ethotoin	nystatin	0317956-0000	perhexiline	zuclopenthixol	metanephrine	oxamniquine	nialamide	tyrphostin AG-825	iobenguane	benzocaine	R-atenolol	suxibuzone	etiocholanolone	ceforanide	terconazole	DL-PPMP	proguanil	piromidic acid	nitrofural	carisoprodol	trichlormethiazide	corticosterone	theobromine	fluocinonide	cinnarizine	cefamandole	pirinixic acid	cinchonine	3-hydroxy-DL-kynurenine	cefotaxime	ketoconazole	tacrolimus	diphemanil metilsulfate	imatinib	mercaptopurine
GSE125449	4	C46	Low	AZD6738 + Tenovin-6	Epothilone B + Tenovin-6	BMS-754807 + Tenovin-6	Epothilone B + AZD6738	BMS-754807 + AZD6738	BMS-754807 + Epothilone B	WIKI4 + BPD-00008900	Brivanib, BMS-540215 + BPD-00008900	Brivanib, BMS-540215 + WIKI4	GSK591 + BPD-00008900	GSK591 + WIKI4	GSK591 + Brivanib, BMS-540215	BIBR-1532 + EPZ004777	MIRA-1 + EPZ004777	EPZ5676 + EPZ004777	MIRA-1 + BIBR-1532	EPZ5676 + BIBR-1532	EPZ5676 + MIRA-1	KIN001-260 + Enzastaurin	CAY10566 + Enzastaurin	CAY10566 + KIN001-260	NVP-TAE684 + Enzastaurin	NVP-TAE684 + KIN001-260	NVP-TAE684 + CAY10566	AST-1306 + ML323	TWS119 + ML323	Camptothecin + ML323	TWS119 + AST-1306	Camptothecin + AST-1306	Camptothecin + TWS119	Methotrexate + CAP-232, TT-232, TLN-232	Tanespimycin + CAP-232, TT-232, TLN-232	Tanespimycin + Methotrexate	BX795 + CAP-232, TT-232, TLN-232	BX795 + Methotrexate	BX795 + Tanespimycin	GDC0810 + ZM447439	Sepantronium bromide + ZM447439	Sepantronium bromide + GDC0810	Panobinostat + ZM447439	Panobinostat + GDC0810	Panobinostat + Sepantronium bromide	WYE-125132 + Vincristine	Flavopiridol + Vincristine	Pelitinib + Vincristine	Flavopiridol + WYE-125132
GSE127465	1	p1	Low	Mitomycin-C + Thapsigargin	AZD5363 + Thapsigargin	BDP-00009066 + Thapsigargin	AZD5363 + Mitomycin-C	BDP-00009066 + Mitomycin-C	BDP-00009066 + AZD5363	BAY-61-3606 + JQ12	HG-5-113-01 + JQ12	OSU-03012 + JQ12	HG-5-113-01 + BAY-61-3606	OSU-03012 + BAY-61-3606	OSU-03012 + HG-5-113-01	MN-64 + Elephantin	QL-XII-61 + Elephantin	GSK650394 + Elephantin	QL-XII-61 + MN-64	GSK650394 + MN-64	GSK650394 + QL-XII-61	IMD-0354 + Genentech Cpd 10	ZSTK474 + Genentech Cpd 10	Pemetrexed + Genentech Cpd 10	ZSTK474 + IMD-0354	Pemetrexed + IMD-0354	Pemetrexed + ZSTK474	TW 37 + LFM-A13	QL-VIII-58 + LFM-A13	Dinaciclib + LFM-A13	QL-VIII-58 + TW 37	Dinaciclib + TW 37	Dinaciclib + QL-VIII-58	Dacinostat + Telomerase Inhibitor IX	GSK1070916 + Telomerase Inhibitor IX	Cediranib + Telomerase Inhibitor IX	GSK1070916 + Dacinostat	Cediranib + Dacinostat	Cediranib + GSK1070916	Sepantronium bromide + GSK1059615	Sepantronium bromide + AZ960	Sepantronium bromide + PAC-1	AZ960 + GSK1059615	PAC-1 + GSK1059615	PAC-1 + AZ960	NVP-ADW742 + Topotecan	Leflunomide + Topotecan	Leflunomide + NVP-ADW742	CD532 + Topotecan
GSE127465	2	p4	Low	Gemcitabine + Sepantronium bromide	Torin 2 + Sepantronium bromide	Panobinostat + Sepantronium bromide	Torin 2 + Gemcitabine	Panobinostat + Gemcitabine	Panobinostat + Torin 2	Mitomycin-C + Shikonin	CAY10603 + Shikonin	Belinostat + Shikonin	CAY10603 + Mitomycin-C	Belinostat + Mitomycin-C	Belinostat + CAY10603	GSK1059615 + CUDC-101	SNX-2112 + CUDC-101	Dacinostat + CUDC-101	SNX-2112 + GSK1059615	Dacinostat + GSK1059615	Dacinostat + SNX-2112	Flavopiridol + IMD-0354	Vinblastine + IMD-0354	Vinblastine + Flavopiridol	Vorinostat + IMD-0354	Vorinostat + Flavopiridol	Vorinostat + Vinblastine	SN-38 + DMOG	Obatoclax Mesylate + DMOG	Apitolisib + DMOG	Obatoclax Mesylate + SN-38	Apitolisib + SN-38	Apitolisib + Obatoclax Mesylate	Sabutoclax + Bortezomib	Telomerase Inhibitor IX + Bortezomib	Paclitaxel + Bortezomib	Telomerase Inhibitor IX + Sabutoclax	Paclitaxel + Sabutoclax	Paclitaxel + Telomerase Inhibitor IX	MK-1775 + ACY-1215	GW843682X + ACY-1215	Epothilone B + ACY-1215	GW843682X + MK-1775	Epothilone B + MK-1775	Epothilone B + GW843682X	WYE-125132 + Vinorelbine	AZD5582 + Vinorelbine	AZD5582 + WYE-125132	Mirin + Vinorelbine
GSE127465	3	p6	Middle	cefapirin	R-atenolol	sulfadiazine	neostigmine bromide	amphotericin B	pilocarpine	dicoumarol	Prestwick-674	pizotifen	kawain	cloxacillin	prilocaine	sulfamethoxazole	domperidone	nefopam	pentolonium
GSE127465	5	p7	Low	IMD-0354 + QL-VIII-58	Sepantronium bromide + QL-VIII-58	Sepantronium bromide + IMD-0354	JW-7-52-1 + QL-VIII-58	JW-7-52-1 + IMD-0354	JW-7-52-1 + Sepantronium bromide	OSU-03012 + CD532	ZG-10 + CD532	Embelin + CD532	ZG-10 + OSU-03012	Embelin + OSU-03012	Embelin + ZG-10	NVP-TAE684 + HG-5-113-01	JQ12 + HG-5-113-01	JQ12 + NVP-TAE684	XMD8-85 + HG-5-113-01	XMD8-85 + NVP-TAE684	XMD8-85 + JQ12	Dacinostat + BX795	PFI-1 + BX795	PFI-1 + Dacinostat	ICL1100013 + BX795	ICL1100013 + Dacinostat	ICL1100013 + PFI-1	XMD8-92 + HG-5-88-01	Seliciclib + HG-5-88-01	Seliciclib + XMD8-92	CGP-082996 + HG-5-88-01	CGP-082996 + XMD8-92	CGP-082996 + Seliciclib	Pyrimethamine + Bexarotene	PF-4708671 + Bexarotene	XMD11-85h + Bexarotene	PF-4708671 + Pyrimethamine	XMD11-85h + Pyrimethamine	XMD11-85h + PF-4708671	Cyclopamine + Selisistat	GSK319347A + Selisistat	Zibotentan + Selisistat	GSK319347A + Cyclopamine	Zibotentan + Cyclopamine	Zibotentan + GSK319347A	AT-7519 + Bleomycin	Thapsigargin + Bleomycin	GSK1059615 + Bleomycin	Thapsigargin + AT-7519
GSE139555	1	Colon2	Middle	puromycin	azacyclonol	drofenine	CAY-10397	monobenzone	cetirizine	MG-262	anisomycin	cantharidin	cefsulodin	emetine	carcinine	hydrastinine	practolol	famprofazone	gemfibrozil	ornidazole	iobenguane	clofazimine	levcycloserine	chlorzoxazone	hesperetin	benperidol	sulfanilamide	betahistine	imidurea	isoxicam	promethazine	zomepirac	antazoline	pimozide	doxazosin	vidarabine	mesalazine	boldine	clioquinol	etilefrine	propranolol	thiamphenicol	enoxacin	vinpocetine	benfluorex	fludroxycortide	alimemazine	proadifen	cefalotin
GSE139555	2	Renal3	Middle	drofenine	loxapine	metixene	dicycloverine	5155877	quinisocaine	lomustine	5255229	amitriptyline	dienestrol	tetrandrine	idazoxan	fluoxetine	phenazopyridine	5182598	fludrocortisone	protriptyline	oxaprozin	lynestrenol	tolazamide	heliotrine	glycopyrronium bromide	merbromin	5211181	clotrimazole	dyclonine	clemastine	prednisolone	Prestwick-967	isosorbide	gossypol	PF-00562151-00	emetine	sulfadimethoxine	levodopa	tropicamide	beclometasone	mexiletine	ergocalciferol	chloropyramine	mephentermine	pirenperone	penbutolol	PNU-0251126	molsidomine	clindamycin
GSE139555	3	Lung1	Middle	mesalazine	fluorocurarine	AG-012559	letrozole	butacaine	antimycin A	latamoxef	cloperastine	cimetidine	dicoumarol	meclofenoxate	dicycloverine	medrysone	verapamil	fenspiride	methapyrilene	etamsylate	hyoscyamine	carteolol	flunixin	clomipramine	lobeline	berberine	Prestwick-559	dirithromycin	clopamide	levonorgestrel	pargyline	glibenclamide	riluzole	spiramycin	atracurium besilate	acemetacin	bemegride	betulin	theobromine	equilin	3-acetamidocoumarin	rescinnamine	alclometasone	triamcinolone	iopamidol	estrone	hydralazine	naringenin	furaltadone
GSE139555	5	Lung4	Middle	Trolox C	fipexide	sulfadiazine	morantel	scoulerine	todralazine	medrysone	atropine methonitrate	demecarium bromide	BAS-012416453	etamsylate	coralyne	zimeldine	skimmianine	R-atenolol	Prestwick-559	rifampicin	PF-01378883-00	iobenguane	letrozole	mexiletine	hydrastine hydrochloride	piretanide	khellin	benzathine benzylpenicillin	ciprofibrate	phenacetin	clorsulon	cefoperazone	oxetacaine	racecadotril	streptozocin	diphenhydramine	ramifenazone	thiethylperazine	isopropamide iodide	bergenin	praziquantel	Prestwick-981	tetracaine	thiamine	isoflupredone
GSE139555	6	Endo2	Middle	alpha-estradiol	imatinib	Trolox C	ellipticine	quinisocaine	omeprazole	2-aminobenzenesulfonamide	daunorubicin	cefixime	amprolium	metformin	etamsylate	isoxsuprine	repaglinide	etynodiol	nomifensine	deferoxamine	(+)-chelidonine	doxorubicin	SR-95639A	proadifen	loracarbef	dicycloverine	neostigmine bromide	propofol	chlorcyclizine	isoconazole	halofantrine	pizotifen	khellin	perphenazine	alfadolone	vanoxerine	tiaprofenic acid
GSE139555	7	Endo3	Middle	tremorine	amoxicillin	etofylline	alimemazine	tranylcypromine	erastin	flumequine	pentetic acid	levocabastine	zimeldine	atropine methonitrate	ceftazidime	flunixin	medrysone	valdecoxib	tyloxapol	exisulind	alpha-estradiol	hyoscyamine	parbendazole	hydrocotarnine	etamsylate	nitrendipine	pyridoxine	butamben	gabapentin	nifuroxazide	chenodeoxycholic acid	dimenhydrinate	dl-alpha tocopherol	arachidonic acid	penbutolol	propofol	clemastine	HC toxin	PHA-00816795	hymecromone	pipenzolate bromide	CP-320650-01	minocycline	adrenosterone	pentolonium	ethambutol	fluorocurarine	karakoline	mebhydrolin
GSE143423	1	TNBC	Low	MG-132 + ZSTK474	GSK1070916 + ZSTK474	TGX221 + ZSTK474	GSK1070916 + MG-132	TGX221 + MG-132	TGX221 + GSK1070916	Ribociclib + OF-1	Alpelisib + OF-1	Gallibiscoquinazole + OF-1	Alpelisib + Ribociclib	Gallibiscoquinazole + Ribociclib	Gallibiscoquinazole + Alpelisib	Omipalisib + MN-64	JW-7-52-1 + MN-64	JW-7-52-1 + Omipalisib	GW843682X + MN-64	GW843682X + Omipalisib	GW843682X + JW-7-52-1	CGP-60474 + A-443654	Paclitaxel + A-443654	Paclitaxel + CGP-60474	S-Trityl-L-cysteine + A-443654	S-Trityl-L-cysteine + CGP-60474	S-Trityl-L-cysteine + Paclitaxel	XMD8-85 + Salubrinal	Sunitinib + Salubrinal	Seliciclib + Salubrinal	Sunitinib + XMD8-85	Seliciclib + XMD8-85	Seliciclib + Sunitinib	Sepantronium bromide + Cyclopamine	Sepantronium bromide + CGP-082996	Sepantronium bromide + WH-4-023	CGP-082996 + Cyclopamine	WH-4-023 + Cyclopamine	WH-4-023 + CGP-082996	WZ-1-84 + BMS-509744	A-770041 + BMS-509744	GNF-2 + BMS-509744	A-770041 + WZ-1-84	GNF-2 + WZ-1-84	GNF-2 + A-770041	Rucaparib + BI-2536	Tozasertib + BI-2536	AZ628 + BI-2536	Tozasertib + Rucaparib
GSE143423	2	lbm1	Low	Apitolisib + Torin 2	Dacinostat + Torin 2	IMD-0354 + Torin 2	Dacinostat + Apitolisib	IMD-0354 + Apitolisib	IMD-0354 + Dacinostat	Panobinostat + GSK1059615	Belinostat + GSK1059615	Belinostat + Panobinostat	AT-7519 + GSK1059615	AT-7519 + Panobinostat	AT-7519 + Belinostat	Trichostatin A + Sabutoclax	ICL1100013 + Sabutoclax	CAY10603 + Sabutoclax	ICL1100013 + Trichostatin A	CAY10603 + Trichostatin A	CAY10603 + ICL1100013	Daporinad + SNX-2112	Buparlisib + SNX-2112	AR-42 + SNX-2112	Buparlisib + Daporinad	AR-42 + Daporinad	AR-42 + Buparlisib	ACY-1215 + AST-1306	BIBF-1120 + AST-1306	BIBF-1120 + ACY-1215	AZD5582 + AST-1306	AZD5582 + ACY-1215	AZD5582 + BIBF-1120	TWS119 + HG6-64-1	CI-1033 + HG6-64-1	5-Fluorouracil + HG6-64-1	CI-1033 + TWS119	5-Fluorouracil + TWS119	5-Fluorouracil + CI-1033	kb NB 142-70 + Teniposide	SN-38 + Teniposide	Camptothecin + Teniposide	SN-38 + kb NB 142-70	Camptothecin + kb NB 142-70	Camptothecin + SN-38	Erlotinib + TPCA-1	Elephantin + TPCA-1	Elephantin + Erlotinib	PFI-1 + TPCA-1
GSE143423	3	lbm2	Low	Sepantronium bromide + THZ-2-102-1	Obatoclax Mesylate + THZ-2-102-1	Torin 2 + THZ-2-102-1	Obatoclax Mesylate + Sepantronium bromide	Torin 2 + Sepantronium bromide	Obatoclax Mesylate + Torin 2	Gemcitabine + QL-VIII-58	Vinorelbine + Gemcitabine	Vinorelbine + QL-VIII-58	Gemcitabine + WZ3105	WZ3105 + QL-VIII-58	Vinorelbine + WZ3105	Doxorubicin + JNK-9L	GW843682X + JNK-9L	GNE-317 + JNK-9L	GW843682X + Doxorubicin	GNE-317 + Doxorubicin	GNE-317 + GW843682X	JW-7-52-1 + Belinostat	Epothilone B + Belinostat	Epothilone B + JW-7-52-1	BI-2536 + Belinostat	BI-2536 + JW-7-52-1	BI-2536 + Epothilone B	OSU-03012 + Mitomycin-C	CX-5461 + OSU-03012	CD532 + OSU-03012	CX-5461 + Mitomycin-C	CD532 + Mitomycin-C	CD532 + CX-5461	ABT737 + SN-38	ABT737 + Omipalisib	Omipalisib + SN-38	IPA-3 + ABT737	IPA-3 + SN-38	IPA-3 + Omipalisib	AS601245 + GSK650394	NVP-BHG712 + GSK650394	NVP-BHG712 + AS601245	QS11 + GSK650394	QS11 + AS601245	QS11 + NVP-BHG712	Bleomycin + Thapsigargin	Parthenolide + Thapsigargin	Ulixertinib + Thapsigargin	Parthenolide + Bleomycin
GSE143423	4	lbm3	Middle	thiostrepton	15-delta prostaglandin J2	5182598	celastrol	resveratrol	HC toxin	piperlongumine	withaferin A	F0447-0125	5194442	cromoglicic acid	phenazopyridine	raloxifene	vorinostat	ethoxyquin	vitexin	dilazep	0317956-0000	hycanthone	natamycin	metyrapone	labetalol	camptothecin	guaifenesin	betazole	Prestwick-685	seneciphylline	5211181	tropicamide	artemisinin	mycophenolic acid	apomorphine	pinacidil	proadifen	etoposide	0175029-0000	ketoprofen	yohimbic acid	epivincamine	quipazine	cefamandole	calcium pantothenate	suprofen	nitrendipine	cicloheximide	Prestwick-1080
GSE146771	1	P0309	Middle	phenoxybenzamine	celastrol	securinine	15-delta prostaglandin J2	lomustine	semustine	disulfiram	thiostrepton	withaferin A	myricetin	cantharidin	diethylstilbestrol	lasalocid	lynestrenol	proadifen	dicycloverine	equilin	perphenazine	estrone	16,16-dimethylprostaglandin E2	pizotifen	sanguinarine	econazole	vanoxerine	dienestrol	5255229	valdecoxib	tetrandrine	quinisocaine	clotrimazole	estradiol	mianserin	F0447-0125	isoconazole	carmustine	oxetacaine	lycorine	5182598	trihexyphenidyl	metformin	papaverine	lisuride	cyclobenzaprine	dyclonine	amitriptyline	desipramine
GSE146771	3	P0410	Middle	cantharidin	MG-132	5255229	fludroxycortide	securinine	15-delta prostaglandin J2	lycorine	lynestrenol	benzydamine	epiandrosterone	benfluorex	monobenzone	domperidone	metformin	ribavirin	valinomycin	bendroflumethiazide	piperlongumine	lovastatin	diethylstilbestrol	thapsigargin	quinisocaine	mefloquine	diflorasone	anisomycin	octopamine	dienestrol	papaverine	flumetasone	buspirone	triamterene	moracizine	nafcillin	proxymetacaine	nitrofural	tetrandrine	furosemide	metrifonate	procainamide	7-aminocephalosporanic acid	spiradoline	isoflupredone	nifuroxazide	boldine	cetirizine	triamcinolone
GSE146771	5	P0408	Middle	celastrol	lomustine	withaferin A	lasalocid	securinine	dicycloverine	5255229	podophyllotoxin	15-delta prostaglandin J2	F0447-0125	PF-00562151-00	metformin	ikarugamycin	oxyphenbutazone	lisuride	chlorphenamine	cisapride	Prestwick-1082	benzydamine	antazoline	phenoxybenzamine	5253409	bepridil	MG-262	amitriptyline	MG-132	isoconazole	5224221	cyproheptadine	tetrandrine	thapsigargin	lycorine	anisomycin	PF-01378883-00	pyrimethamine	nomegestrol	thiostrepton	triamterene	cantharidin	STOCK1N-35215	trihexyphenidyl	phenanthridinone	metergoline	thioproperazine	cefoperazone	noretynodrel
GSE146771	6	P0613	Middle	celastrol	lomustine	phenoxybenzamine	cantharidin	sanguinarine	dienestrol	securinine	PF-00562151-00	lynestrenol	metformin	betulinic acid	pizotifen	F0447-0125	mestranol	lisuride	merbromin	cytochalasin B	equilin	papaverine	drofenine	nitrofurantoin	vigabatrin	hydroxyzine	fludroxycortide	5253409	isoconazole	carmustine	ethoxyquin	disulfiram	proadifen	tropicamide	dicycloverine	vanoxerine	parthenolide	15-delta prostaglandin J2	bepridil	scoulerine	valinomycin	5224221	troglitazone	tetrandrine	ursolic acid	imipramine	isoetarine	oxybenzone	trihexyphenidyl
GSE176078	1	CID44971	Low	Sabutoclax + Dactolisib	JW-7-52-1 + Dactolisib	HG-5-113-01 + Dactolisib	JW-7-52-1 + Sabutoclax	HG-5-113-01 + Sabutoclax	HG-5-113-01 + JW-7-52-1	Paclitaxel + ZG-10	GW843682X + ZG-10	A-443654 + ZG-10	GW843682X + Paclitaxel	A-443654 + Paclitaxel	A-443654 + GW843682X	CGP-60474 + XMD8-92	BI-2536 + XMD8-92	XMD11-85h + XMD8-92	BI-2536 + CGP-60474	XMD11-85h + CGP-60474	XMD11-85h + BI-2536	Sepantronium bromide + S-Trityl-L-cysteine	CMK + S-Trityl-L-cysteine	Sepantronium bromide + CMK	Seliciclib + S-Trityl-L-cysteine	Sepantronium bromide + Seliciclib	Seliciclib + CMK	XMD8-85 + Torin 2	Crizotinib + Torin 2	Crizotinib + XMD8-85	WZ-1-84 + Torin 2	WZ-1-84 + XMD8-85	WZ-1-84 + Crizotinib	Cyclopamine + GSK319347A	Imatinib + GSK319347A	Imatinib + Cyclopamine	PD0325901 + GSK319347A	PD0325901 + Cyclopamine	PD0325901 + Imatinib	AT13148 + GSK650394	Vincristine + GSK650394	GSK1070916 + GSK650394	Vincristine + AT13148	GSK1070916 + AT13148	GSK1070916 + Vincristine	Topotecan + MPS-1-IN-1	Mitoxantrone + MPS-1-IN-1	Mitoxantrone + Topotecan	AZ960 + MPS-1-IN-1
GSE72056	2	Patient80	Low	Dactolisib + THZ-2-102-1	QL-VIII-58 + THZ-2-102-1	JW-7-52-1 + THZ-2-102-1	QL-VIII-58 + Dactolisib	JW-7-52-1 + Dactolisib	JW-7-52-1 + QL-VIII-58	Sabutoclax + Paclitaxel	AZ628 + Paclitaxel	AZ628 + Sabutoclax	AZD6738 + Paclitaxel	AZD6738 + Sabutoclax	AZD6738 + AZ628	Dabrafenib + MG-132	Rapamycin + MG-132	Voxtalisib + MG-132	Rapamycin + Dabrafenib	Voxtalisib + Dabrafenib	Voxtalisib + Rapamycin	XMD8-85 + SCH772984	AZ6102 + SCH772984	AZ6102 + XMD8-85	Ulixertinib + SCH772984	Ulixertinib + XMD8-85	Ulixertinib + AZ6102	ZM447439 + BMS-509744	BDP-00009066 + BMS-509744	KU-55933 + BMS-509744	BDP-00009066 + ZM447439	KU-55933 + ZM447439	KU-55933 + BDP-00009066	GSK319347A + PHA-665752	AMG-319 + PHA-665752	AMG-319 + GSK319347A	Entospletinib + PHA-665752	Entospletinib + GSK319347A	Entospletinib + AMG-319	Thapsigargin + LJI308	Lestaurtinib + LJI308	Sepantronium bromide + LJI308	Lestaurtinib + Thapsigargin	Sepantronium bromide + Thapsigargin	Sepantronium bromide + Lestaurtinib	AS605240 + NSC-207895	XMD11-85h + NSC-207895	Kobe2602 + NSC-207895	XMD11-85h + AS605240
GSE72056	3	Patient79	Middle	oxaprozin	etamsylate	etamsylate	alclometasone	betazole	levamisole	propofol	pentolonium	dropropizine	sulfamethoxazole	5149715	hydralazine
GSE72056	4	Patient58	Middle	demecarium bromide	diethylcarbamazine	albendazole	BAS-012416453	butirosin	ticarcillin	nisoxetine	ajmaline	ketorolac	chlortetracycline	mebeverine	idazoxan	scoulerine	cefaclor	securinine
GSE72056	5	Patient78	Low	Dactolisib + Dactinomycin	Dinaciclib + Dactinomycin	Dinaciclib + Dactolisib	Mitomycin-C + Dactinomycin	Mitomycin-C + Dactolisib	Mitomycin-C + Dinaciclib	(5Z)-7-Oxozeaenol + AZD7762	GNE-317 + AZD7762	GNE-317 + (5Z)-7-Oxozeaenol	Trametinib + AZD7762	Trametinib + (5Z)-7-Oxozeaenol	Obatoclax Mesylate + (5Z)-7-Oxozeaenol	Cytarabine + (5Z)-7-Oxozeaenol	Trametinib + GNE-317	Cytarabine + Obatoclax Mesylate	AZD6738 + (5Z)-7-Oxozeaenol	Epirubicin + (5Z)-7-Oxozeaenol	Panobinostat + (5Z)-7-Oxozeaenol	AZD6738 + Obatoclax Mesylate	THZ-2-49 + (5Z)-7-Oxozeaenol	AZD6738 + Cytarabine	JNK-9L + (5Z)-7-Oxozeaenol	Gemcitabine + (5Z)-7-Oxozeaenol	HG6-64-1 + (5Z)-7-Oxozeaenol	HG-5-113-01 + (5Z)-7-Oxozeaenol	Topotecan + (5Z)-7-Oxozeaenol	OTX015 + (5Z)-7-Oxozeaenol	IMD-0354 + (5Z)-7-Oxozeaenol	ZG-10 + (5Z)-7-Oxozeaenol	AZ960 + (5Z)-7-Oxozeaenol	Panobinostat + Epirubicin	THZ-2-49 + Epirubicin	THZ-2-49 + Panobinostat	SCH772984 + (5Z)-7-Oxozeaenol	Gemcitabine + JNK-9L	Trichostatin A + (5Z)-7-Oxozeaenol	Flavopiridol + (5Z)-7-Oxozeaenol	Taselisib + (5Z)-7-Oxozeaenol	HG6-64-1 + JNK-9L	Cediranib + (5Z)-7-Oxozeaenol	HG6-64-1 + Gemcitabine	GSK2606414 + (5Z)-7-Oxozeaenol	WYE-125132 + (5Z)-7-Oxozeaenol	AZD8186 + (5Z)-7-Oxozeaenol	Topotecan + HG-5-113-01	OTX015 + HG-5-113-01
GSE72056	6	Patient88	Low	Omipalisib + Sepantronium bromide	Obatoclax Mesylate + Sepantronium bromide	QL-VIII-58 + Sepantronium bromide	Obatoclax Mesylate + Omipalisib	QL-VIII-58 + Omipalisib	QL-VIII-58 + Obatoclax Mesylate	Entinostat + Thapsigargin	JW-7-52-1 + Thapsigargin	A-443654 + Thapsigargin	JW-7-52-1 + Entinostat	A-443654 + Entinostat	A-443654 + JW-7-52-1	THZ-2-49 + ZG-10	Paclitaxel + ZG-10	Paclitaxel + THZ-2-49	AS605240 + ZG-10	AS605240 + THZ-2-49	AS605240 + Paclitaxel	Axitinib + A-770041	CGP-60474 + A-770041	S-Trityl-L-cysteine + A-770041	CGP-60474 + Axitinib	S-Trityl-L-cysteine + Axitinib	S-Trityl-L-cysteine + CGP-60474	HG-5-113-01 + Salubrinal	CP466722 + Salubrinal	CP466722 + HG-5-113-01	OSU-03012 + Salubrinal	OSU-03012 + HG-5-113-01	OSU-03012 + CP466722	GW843682X + Piperlongumine	Rapamycin + Piperlongumine	NG-25 + Piperlongumine	Rapamycin + GW843682X	NG-25 + GW843682X	NG-25 + Rapamycin	SCH772984 + Z-LLNle-CHO	Seliciclib + Z-LLNle-CHO	GSK269962A + Z-LLNle-CHO	Seliciclib + SCH772984	GSK269962A + SCH772984	GSK269962A + Seliciclib	ZM447439 + WZ-1-84	CMK + WZ-1-84	Alpelisib + WZ-1-84	CMK + ZM447439
GSE162454	1	Patient 4	Middle	miconazole	alpha-ergocryptine	noscapine	ondansetron	ketorolac	nefopam	sulfamethoxazole	carbamazepine	prilocaine	tetroquinone
GSE162454	2	Patient 6	Middle	iloprost	cyclic adenosine monophosphate	metanephrine	albendazole	thiamphenicol	chloropyrazine	heptaminol	tolbutamide	terazosin	calcium folinate	streptozocin	metrifonate	zaprinast	tocainide	iopamidol	dapsone	brinzolamide	cefapirin	amprolium	noscapine	acemetacin	xamoterol	streptomycin	harmalol	betaxolol	eldeline	nomegestrol	dirithromycin	tracazolate	Prestwick-1085	remoxipride	paracetamol	cefaclor	hydrastinine	solanine	lovastatin	phenanthridinone	lasalocid	sulfamerazine	cycloserine	pentamidine	mebeverine	saquinavir	vincamine	etiocholanolone	nitrofural
GSE162454	3	Patient 2	Middle	iloprost	cyclic adenosine monophosphate	metanephrine	albendazole	thiamphenicol	chloropyrazine	heptaminol	tolbutamide	terazosin	calcium folinate	streptozocin	metrifonate	zaprinast	tocainide	iopamidol	dapsone	brinzolamide	cefapirin	amprolium	noscapine	acemetacin	xamoterol	streptomycin	harmalol	betaxolol	eldeline	nomegestrol	dirithromycin	tracazolate	Prestwick-1085	remoxipride	paracetamol	cefaclor	hydrastinine	solanine	lovastatin	phenanthridinone	lasalocid	sulfamerazine	cycloserine	pentamidine	mebeverine	saquinavir	vincamine	etiocholanolone	nitrofural
GSE140228	5	T8	Low	aminophenazone	amiloride	guanabenz	rolipram	mianserin	levothyroxine sodium	megestrol	nicergoline	karakoline	flucloxacillin	mestranol	ascorbic acid	guanfacine	ikarugamycin	cefoperazone	lovastatin	indapamide	quinisocaine	diphenhydramine	timolol	propidium iodide	sulfabenzamide	hecogenin	triamcinolone	epitiostanol	betamethasone	dinoprost	W-13	vitexin	cefalexin	meticrane	Prestwick-1084	diltiazem	ozagrel	flurbiprofen	sulfametoxydiazine	estriol	hyoscyamine	5155877	deferoxamine	BCB000039
GSE139829	1	UMM069	Low	XMD8-92 + ZG-10	BIX02189 + ZG-10	TAK-715 + ZG-10	BIX02189 + XMD8-92	TAK-715 + XMD8-92	TAK-715 + BIX02189	AZD5363 + PRT062607	VE-822 + PRT062607	VE-822 + AZD5363	Sepantronium bromide + PRT062607	Sepantronium bromide + AZD5363	Sepantronium bromide + VE-822	AT-7519 + GSK1059615	ARRY-520 + GSK1059615	Elesclomol + GSK1059615	ARRY-520 + AT-7519	Elesclomol + AT-7519	Elesclomol + ARRY-520	BIBF-1120 + Dactolisib	LCL161 + Dactolisib	LCL161 + BIBF-1120	JW-7-52-1 + Dactolisib	JW-7-52-1 + BIBF-1120	JW-7-52-1 + LCL161	THZ-2-102-1 + Bleomycin (50 uM)	THZ-2-102-1 + Panobinostat	Panobinostat + Bleomycin (50 uM)	Torin 2 + THZ-2-102-1	Torin 2 + Bleomycin (50 uM)	Torin 2 + Panobinostat	Lestaurtinib + Mitomycin-C	Omipalisib + Mitomycin-C	JNK-9L + Mitomycin-C	Omipalisib + Lestaurtinib	Lestaurtinib + JNK-9L	Omipalisib + JNK-9L	Paclitaxel + WZ3105	WZ3105 + BX-912	WZ3105 + Thapsigargin	Paclitaxel + BX-912	Paclitaxel + Thapsigargin	Thapsigargin + BX-912	BMS-345541 + Afuresertib	Uprosertib + Afuresertib	BMS-345541 + Uprosertib	MG-132 + Afuresertib
GSE139829	2	UMM063	Low	Torin 2 + Dactolisib	WZ3105 + Dactolisib	WZ3105 + Torin 2	Dasatinib + Dactolisib	Dasatinib + Torin 2	Dasatinib + WZ3105	A-443654 + FH535	FH535 + Sabutoclax	ARRY-520 + FH535	A-443654 + Sabutoclax	ARRY-520 + A-443654	ARRY-520 + Sabutoclax	Z-LLNle-CHO + Pelitinib	GW843682X + Pelitinib	WH-4-023 + Pelitinib	GW843682X + Z-LLNle-CHO	WH-4-023 + Z-LLNle-CHO	WH-4-023 + GW843682X	Sepantronium bromide + S-Trityl-L-cysteine	Sepantronium bromide + Tozasertib	Sepantronium bromide + Sunitinib	Tozasertib + S-Trityl-L-cysteine	Sunitinib + S-Trityl-L-cysteine	Sunitinib + Tozasertib	BI-2536 + AZD6738	JNJ38877605 + BI-2536	JNJ38877605 + AZD6738	GSK1059615 + BI-2536	GSK1059615 + AZD6738	GSK1059615 + JNJ38877605	QL-VIII-58 + CGP-60474	NVP-TAE684 + CGP-60474	NVP-TAE684 + QL-VIII-58	PAC-1 + CGP-60474	PAC-1 + QL-VIII-58	PAC-1 + NVP-TAE684	AZ960 + AZ6102	CMK + AZ6102	Thapsigargin + AZ6102	CMK + AZ960	Thapsigargin + AZ960	Thapsigargin + CMK	Salubrinal + SCH772984	AZD5582 + Salubrinal	AZD5582 + SCH772984	Salubrinal + BDP-00009066
GSE139829	3	UMM064	Low	WZ3105 + THZ-2-102-1	XMD8-85 + THZ-2-102-1	Omipalisib + THZ-2-102-1	XMD8-85 + WZ3105	Omipalisib + WZ3105	Omipalisib + XMD8-85	Pelitinib + TW 37	LCL161 + TW 37	LCL161 + Pelitinib	A-770041 + TW 37	A-770041 + Pelitinib	A-770041 + LCL161	GW843682X + AZD4547	Elesclomol + AZD4547	Elesclomol + GW843682X	ZSTK474 + AZD4547	ZSTK474 + GW843682X	ZSTK474 + Elesclomol	Torin 2 + Z-LLNle-CHO	A-443654 + Z-LLNle-CHO	Torin 2 + A-443654	S-Trityl-L-cysteine + Z-LLNle-CHO	Torin 2 + S-Trityl-L-cysteine	S-Trityl-L-cysteine + A-443654	WH-4-023 + Dactolisib	Sunitinib + Dactolisib	Sepantronium bromide + Dactolisib	Sunitinib + WH-4-023	Sepantronium bromide + WH-4-023	Sepantronium bromide + Sunitinib	QL-VIII-58 + Enzastaurin	QL-VIII-58 + WZ-1-84	QL-VIII-58 + GNF-2	WZ-1-84 + Enzastaurin	GNF-2 + Enzastaurin	GNF-2 + WZ-1-84	Ribociclib + CGP-60474	Alpelisib + CGP-60474	CMK + CGP-60474	Alpelisib + Ribociclib	CMK + Ribociclib	CMK + Alpelisib	Seliciclib + Salubrinal	Cyclopamine + Salubrinal	AZ628 + Salubrinal	Cyclopamine + Seliciclib
GSE139829	4	UMM059	Middle	verteporfin	epivincamine	tolbutamide	nimodipine	chlorpropamide	isoxsuprine	clidinium bromide	neostigmine bromide	oxprenolol	domperidone	hydrastine hydrochloride	protoveratrine A	flucytosine	cyproheptadine	trioxysalen	benzydamine	1	doxepin	butacaine	mefloquine	octopamine	sulfinpyrazone	SR-95531	droperidol	canrenoic acid	hyoscyamine	meticrane	betahistine	monobenzone	clomifene
GSE139829	5	UMM061	Middle	imatinib	doxorubicin	daunorubicin	mitoxantrone	gliclazide	amantadine	bretylium tosilate	Prestwick-972	halofantrine	folic acid	guaifenesin	benzbromarone	finasteride	diphemanil metilsulfate	cefadroxil	pivmecillinam	benzocaine	monocrotaline	salsolidin	domperidone	dimethadione	roxithromycin	colecalciferol	cefotetan	N6-methyladenosine	imipramine	troleandomycin	coralyne	triamterene	pyrazinamide	betahistine	esculetin	dipivefrine	equilin	flunisolide	sulfathiazole	7-aminocephalosporanic acid	gramine	levcycloserine	benfluorex	dexpropranolol	boldine	SR-95531	liothyronine	celecoxib	trioxysalen
GSE139829	6	UMM065	Middle	podophyllotoxin	withaferin A	nadide	streptozocin	PNU-0251126	diphemanil metilsulfate	noretynodrel	clorsulon	tolbutamide	sisomicin	mesoridazine	sulindac	decamethonium bromide	dantrolene	glibenclamide	vanoxerine	S-propranolol	chlorzoxazone	piperidolate	lymecycline	trioxysalen	theobromine	SR-95531	cinoxacin	procainamide	hyoscyamine	clofibrate
GSE154109	1	P5	Low	SN-38 + Gemcitabine	Dinaciclib + Gemcitabine	Bleomycin + Gemcitabine	Dinaciclib + SN-38	Bleomycin + SN-38	Bleomycin + Dinaciclib	Daporinad + AZD7762	Sepantronium bromide + AZD7762	Sepantronium bromide + Daporinad	MK-1775 + AZD7762	MK-1775 + Daporinad	Sepantronium bromide + MK-1775	Mitomycin-C + Vinorelbine	Lestaurtinib + Vinorelbine	Vorinostat + Vinorelbine	Mitomycin-C + Lestaurtinib	Mitomycin-C + Vorinostat	Vorinostat + Lestaurtinib	GNE-317 + Buparlisib	Piperlongumine + Buparlisib	Piperlongumine + GNE-317	AZ960 + Buparlisib	AZ960 + GNE-317	AZ960 + Piperlongumine	Luminespib + Podophyllotoxin bromide	Uprosertib + Podophyllotoxin bromide	Tanespimycin + Podophyllotoxin bromide	Uprosertib + Luminespib	Tanespimycin + Luminespib	Tanespimycin + Uprosertib	Leflunomide + BDP-00009066	Afuresertib + BDP-00009066	AZD8186 + BDP-00009066	Afuresertib + Leflunomide	AZD8186 + Leflunomide	AZD8186 + Afuresertib	Pictilisib + EHT-1864	Wee1 Inhibitor + EHT-1864	Wee1 Inhibitor + Pictilisib	Serdemetan + EHT-1864	Serdemetan + Pictilisib	Serdemetan + Wee1 Inhibitor	AZD5363 + RO-3306	Axitinib + RO-3306	Tretinoin + RO-3306	Axitinib + AZD5363
GSE154109	2	P3	Low	GSK1059615 + Obatoclax Mesylate	Sepantronium bromide + Obatoclax Mesylate	Apitolisib + Obatoclax Mesylate	Sepantronium bromide + GSK1059615	Apitolisib + GSK1059615	Apitolisib + Sepantronium bromide	Thapsigargin + Shikonin	Belinostat + Shikonin	Belinostat + Thapsigargin	CAY10603 + Shikonin	CAY10603 + Thapsigargin	CAY10603 + Belinostat	Elesclomol + Trametinib	Epothilone B + Trametinib	JW-7-52-1 + Trametinib	Epothilone B + Elesclomol	JW-7-52-1 + Elesclomol	JW-7-52-1 + Epothilone B	JNK-9L + DMOG	GW843682X + DMOG	AST-1306 + DMOG	GW843682X + JNK-9L	AST-1306 + JNK-9L	AST-1306 + GW843682X	OSU-03012 + Vinorelbine	YK-4-279 + Vinorelbine	YK-4-279 + OSU-03012	Bleomycin (50 uM) + Vinorelbine	Bleomycin (50 uM) + OSU-03012	Bleomycin (50 uM) + YK-4-279	FH535 + CGP-60474	UNC0638 + CGP-60474	UNC0638 + FH535	Refametinib + CGP-60474	Refametinib + FH535	Refametinib + UNC0638	Docetaxel + AS605240	BI-2536 + AS605240	BI-2536 + Docetaxel	Talazoparib + AS605240	Talazoparib + Docetaxel	Talazoparib + BI-2536	Dabrafenib + Selumetinib	AZ628 + Selumetinib	AZ628 + Dabrafenib	Bortezomib + Selumetinib
GSE154109	3	P1	Middle	cefapirin	mycophenolic acid	bretylium tosilate	CP-863187	netilmicin	cycloserine	bemegride	acebutolol	lithocholic acid	nystatin	cyclizine	clindamycin	ampyrone	cinchonine	Prestwick-1080	nadolol	clopamide	sulfathiazole	Prestwick-984	metanephrine	benserazide	esculetin	fenbendazole	danazol	isoxicam	paclitaxel	nitrofural	5149715	verapamil	sulfadoxine	chlorhexidine	omeprazole	MG-132	ambroxol
GSE138709	1	P4	Low	Dinaciclib + Vincristine	Sepantronium bromide + Vincristine	Sepantronium bromide + Dinaciclib	Sabutoclax + Vincristine	Sabutoclax + Dinaciclib	Sabutoclax + Sepantronium bromide	Thapsigargin + Torin 2	MK-1775 + Torin 2	MK-1775 + Thapsigargin	OTX015 + Torin 2	OTX015 + Thapsigargin	OTX015 + MK-1775	Ulixertinib + AZD8055	Entinostat + AZD8055	Teniposide + AZD8055	Entinostat + Ulixertinib	Teniposide + Ulixertinib	Teniposide + Entinostat	Elephantin + NVP-ADW742	AZ6102 + NVP-ADW742	AZ6102 + Elephantin	Podophyllotoxin bromide + NVP-ADW742	Podophyllotoxin bromide + Elephantin	Podophyllotoxin bromide + AZ6102	PRT062607 + Cediranib	Mitoxantrone + Cediranib	AZD5582 + Cediranib	Mitoxantrone + PRT062607	AZD5582 + PRT062607	AZD5582 + Mitoxantrone	ARRY-520 + KRAS (G12C) Inhibitor-12	Dihydrorotenone + KRAS (G12C) Inhibitor-12	Dihydrorotenone + ARRY-520	ACY-1215 + KRAS (G12C) Inhibitor-12	ACY-1215 + ARRY-520	ACY-1215 + Dihydrorotenone	Ipatasertib + GSK2606414	AZD4547 + GSK2606414	Sorafenib + GSK2606414	AZD4547 + Ipatasertib	Sorafenib + Ipatasertib	Sorafenib + AZD4547	Topotecan + Leflunomide	WZ4003 + Leflunomide	AZD8186 + Leflunomide	WZ4003 + Topotecan
GSE138709	2	P1	Middle	ribostamycin	canrenoic acid	cefotetan	copper sulfate	securinine	levomepromazine	papaverine	dequalinium chloride	myricetin	isotretinoin	ajmaline	apramycin	levothyroxine sodium	sulfamonomethoxine	dehydrocholic acid	imidurea
GSE138709	3	P2	Middle	lanatoside C	puromycin	parthenolide	cantharidin	piperlongumine	estrone	ouabain	cephaeline	fenbendazole	theobromine	monobenzone	naproxen	lycorine	miconazole	(+)-chelidonine	oxolamine	estradiol	cinchonine	ceforanide	sulconazole	Prestwick-1082	urapidil	acepromazine	latamoxef	flunixin	benzylpenicillin	medrysone	amrinone	luteolin	sulfasalazine	meclozine	quinostatin	ribostamycin	apomorphine	apigenin	6-azathymine	prazosin	verapamil	LY-294002	methotrexate	deferoxamine	doxorubicin	harmine	harmol	sirolimus	5114445
GSE138709	4	P5	Middle	celastrol	azacitidine	calmidazolium	camptothecin	MG-132	dosulepin	oxyphenbutazone	meprylcaine	rottlerin	clonidine	lithocholic acid	hydralazine	scoulerine	apigenin	amrinone	0173570-0000	diphemanil metilsulfate	luteolin	hydroflumethiazide
GSE121636	1	P3	Middle	H-89	nadolol	dienestrol	securinine	estrone	biperiden	butyl hydroxybenzoate	vanoxerine	metformin	vinburnine	dicycloverine	fusidic acid	ciprofibrate	metrizamide	hydroflumethiazide	chenodeoxycholic acid	sanguinarine	heptaminol	benzonatate	piromidic acid	altizide	celastrol	chlorambucil	isocorydine	flunixin	diflorasone	sulconazole	atovaquone	verapamil	medrysone	Y-27632	alclometasone	clofazimine	fludroxycortide	6-bromoindirubin-3'-oxime	sulfapyridine	pivampicillin	cicloheximide	spiperone	methylprednisolone	clotrimazole	halcinonide	meteneprost	benfluorex	emetine	azacyclonol
GSE150660	1	Patient_D	Low	Sepantronium bromide + NSC319726	Vincristine + NSC319726	Vincristine + Sepantronium bromide	SNX-2112 + NSC319726	SNX-2112 + Sepantronium bromide	SNX-2112 + Vincristine	AR-42 + QL-VIII-58	Panobinostat + QL-VIII-58	ZG-10 + QL-VIII-58	Panobinostat + AR-42	ZG-10 + AR-42	ZG-10 + Panobinostat	AZ628 + Phenformin	kb NB 142-70 + Phenformin	Epirubicin + Phenformin	kb NB 142-70 + AZ628	Epirubicin + AZ628	Epirubicin + kb NB 142-70	UMI-77 + BX-912	NU7441 + BX-912	AGI-5198 + BX-912	NU7441 + UMI-77	AGI-5198 + UMI-77	AGI-5198 + NU7441	AZ960 + Wnt-C59	CAY10566 + Wnt-C59	CAY10566 + AZ960	GSK429286A + Wnt-C59	GSK429286A + AZ960	GSK429286A + CAY10566	Kobe2602 + Cyclophosphamide	A-83-01 + Cyclophosphamide	A-83-01 + Kobe2602	Venotoclax + Cyclophosphamide	Venotoclax + Kobe2602	Venotoclax + A-83-01	CGP-082996 + PFI-3	Ara-G + PFI-3	KIN001-236 + PFI-3	Ara-G + CGP-082996	KIN001-236 + CGP-082996	KIN001-236 + Ara-G	NVP-ADW742 + Oxaliplatin	Dihydrorotenone + Oxaliplatin	OF-1 + Oxaliplatin	Dihydrorotenone + NVP-ADW742
GSE150660	2	Patient_A	Middle	parbendazole	bufexamac	fluvastatin	sulfadiazine	mesalazine	acetylsalicylsalicylic acid	metyrapone	amikacin	amrinone	levobunolol	etynodiol	phenazone	Prestwick-1103	betulinic acid	suprofen	mafenide	5162773	loracarbef	amiprilose	proguanil	iopamidol	2-aminobenzenesulfonamide	(+/-)-catechin	scopoletin	betulin	nadolol	ondansetron	megestrol	trimethobenzamide	risperidone	cefapirin	celastrol	metoprolol	clobetasol	medrysone	sulfapyridine	lansoprazole	bethanechol	tetrahydroalstonine	ginkgolide A	dioxybenzone	tolfenamic acid	cefotetan	alpha-estradiol	propidium iodide	tacrine
GSE131309	1	Patient 3	Low	Torin 2 + Sepantronium bromide	Obatoclax Mesylate + Sepantronium bromide	Obatoclax Mesylate + Torin 2	Belinostat + Sepantronium bromide	Belinostat + Torin 2	Belinostat + Obatoclax Mesylate	PD0325901 + Panobinostat	ARRY-520 + Panobinostat	Luminespib + Panobinostat	ARRY-520 + PD0325901	Luminespib + PD0325901	Luminespib + ARRY-520	Apitolisib + IMD-0354	SN-38 + IMD-0354	SN-38 + Apitolisib	CAY10603 + IMD-0354	CAY10603 + Apitolisib	CAY10603 + SN-38	Pevonedistat + Sabutoclax	AR-42 + Sabutoclax	CUDC-101 + Sabutoclax	AR-42 + Pevonedistat	CUDC-101 + Pevonedistat	CUDC-101 + AR-42	SNX-2112 + Mitoxantrone	Vinblastine + Mitoxantrone	Vinblastine + SNX-2112	FH535 + Mitoxantrone	FH535 + SNX-2112	FH535 + Vinblastine	Epirubicin + Vinorelbine	Topotecan + Vinorelbine	Topotecan + Epirubicin	Flavopiridol + Vinorelbine	Flavopiridol + Epirubicin	Flavopiridol + Topotecan	PI-103 + QL-XII-47	Cytarabine + QL-XII-47	Teniposide + QL-XII-47	Cytarabine + PI-103	Teniposide + PI-103	Teniposide + Cytarabine	SCH772984 + MK-1775	Ulixertinib + MK-1775	PF-00299804 + MK-1775	Ulixertinib + SCH772984
GSE131309	2	Patient 11	Low	Obatoclax Mesylate + Sepantronium bromide	Daporinad + Sepantronium bromide	Vincristine + Sepantronium bromide	Daporinad + Obatoclax Mesylate	Vincristine + Obatoclax Mesylate	Vincristine + Daporinad	Belinostat + Dacinostat	Vinblastine + Dacinostat	Vinblastine + Belinostat	Panobinostat + Dacinostat	Panobinostat + Belinostat	Panobinostat + Vinblastine	Sabutoclax + DMOG	CUDC-101 + DMOG	CUDC-101 + Sabutoclax	CAY10603 + DMOG	CAY10603 + Sabutoclax	CAY10603 + CUDC-101	Dinaciclib + Epothilone B	AR-42 + Epothilone B	IMD-0354 + Epothilone B	AR-42 + Dinaciclib	IMD-0354 + Dinaciclib	IMD-0354 + AR-42	Vinorelbine + Flavopiridol	ICL1100013 + Flavopiridol	ICL1100013 + Vinorelbine	AZD7762 + Flavopiridol	AZD7762 + Vinorelbine	AZD7762 + ICL1100013	Luminespib + WYE-125132	MK-1775 + WYE-125132	MK-1775 + Luminespib	JNK-9L + WYE-125132	JNK-9L + Luminespib	JNK-9L + MK-1775	Taselisib + OSU-03012	GNE-317 + OSU-03012	GNE-317 + Taselisib	JW-7-24-1 + OSU-03012	JW-7-24-1 + Taselisib	JW-7-24-1 + GNE-317	FH535 + Elesclomol	Docetaxel + Elesclomol	Shikonin + Elesclomol	Docetaxel + FH535
GSE131309	3	Patient 2	Middle	W-13	sulfadiazine	bicuculline	ajmaline	loxapine	methyldopate	lynestrenol	ikarugamycin
GSE131309	4	Patient 4	Middle	celastrol	puromycin	prenylamine	calmidazolium	cloperastine	parthenolide	thioridazine	1,4-chrysenequinone	pimethixene	terfenadine	anisomycin	amylocaine	phenazopyridine	azaperone	cephaeline	suloctidil	securinine	15-delta prostaglandin J2	diclofenac	norcyclobenzaprine	glimepiride	emetine	fenbendazole	azacyclonol	atropine	felodipine	mefloquine	5279552	ebselen	cyproheptadine	mebendazole	isotretinoin	BW-B70C	blebbistatin	fluphenazine	bemegride	fendiline	clomifene	strophanthidin	Prestwick-983	cimetidine	bepridil	propafenone	pipemidic acid	pioglitazone	flufenamic acid
GSE148673	1	ATC265T	Low	Obatoclax Mesylate + THZ-2-102-1	Sepantronium bromide + THZ-2-102-1	GSK1070916 + THZ-2-102-1	Sepantronium bromide + Obatoclax Mesylate	GSK1070916 + Obatoclax Mesylate	GSK1070916 + Sepantronium bromide	Doxorubicin + ZSTK474	Epothilone B + ZSTK474	OSU-03012 + ZSTK474	Epothilone B + Doxorubicin	OSU-03012 + Doxorubicin	OSU-03012 + Epothilone B	QS11 + ZM447439	SL0101 + ZM447439	SL0101 + QS11	Gemcitabine + ZM447439	Gemcitabine + QS11	Gemcitabine + SL0101	Dactolisib + Torin 2	QL-VIII-58 + Torin 2	Mitomycin-C + Torin 2	QL-VIII-58 + Dactolisib	Mitomycin-C + Dactolisib	Mitomycin-C + QL-VIII-58	AT-7519 + WZ3105	GSK1059615 + WZ3105	SNX-2112 + WZ3105	GSK1059615 + AT-7519	SNX-2112 + AT-7519	SNX-2112 + GSK1059615	Bortezomib + Thapsigargin	Omipalisib + Thapsigargin	Dinaciclib + Thapsigargin	Omipalisib + Bortezomib	Dinaciclib + Bortezomib	Dinaciclib + Omipalisib	Etoposide + JNK-9L	Ispinesib Mesylate + JNK-9L	Vinorelbine + JNK-9L	Ispinesib Mesylate + Etoposide	Vinorelbine + Etoposide	Vinorelbine + Ispinesib Mesylate	CD532 + Sabutoclax	TW 37 + Sabutoclax	TAK-715 + Sabutoclax	TW 37 + CD532
GSE148673	2	ATC273T	Low	Sepantronium bromide + Thapsigargin	Thapsigargin + Torin 2	Sepantronium bromide + Torin 2	QL-VIII-58 + Thapsigargin	Sepantronium bromide + QL-VIII-58	QL-VIII-58 + Torin 2	Dactolisib + PD0325901	HG-5-88-01 + Dactolisib	XMD8-92 + Dactolisib	HG-5-88-01 + PD0325901	XMD8-92 + PD0325901	XMD8-92 + HG-5-88-01	ZG-10 + XMD11-85h	KIN001-236 + XMD11-85h	KIN001-236 + ZG-10	BI-2536 + XMD11-85h	BI-2536 + ZG-10	BI-2536 + KIN001-236	PRIMA-1MET + Paclitaxel	Elephantin + Paclitaxel	Elephantin + PRIMA-1MET	CGP-60474 + Paclitaxel	CGP-60474 + PRIMA-1MET	CGP-60474 + Elephantin	Dihydrorotenone + Taselisib	ML323 + Taselisib	A-770041 + Taselisib	ML323 + Dihydrorotenone	A-770041 + Dihydrorotenone	A-770041 + ML323	BMS-509744 + QS11	Bleomycin (50 uM) + QS11	Bleomycin (50 uM) + BMS-509744	PF-4708671 + QS11	PF-4708671 + BMS-509744	PF-4708671 + Bleomycin (50 uM)	WH-4-023 + SNX-2112	Saracatinib + SNX-2112	Saracatinib + WH-4-023	Etoposide + SNX-2112	Etoposide + WH-4-023	Etoposide + Saracatinib	GSK1059615 + CMK	GSK1059615 + Parthenolide	Parthenolide + CMK	GSK1059615 + LFM-A13
GSE148673	3	ATC269T	Low	SNX-2112 + Omipalisib	GSK1070916 + Omipalisib	Torin 2 + Omipalisib	GSK1070916 + SNX-2112	Torin 2 + SNX-2112	Torin 2 + GSK1070916	Sepantronium bromide + JW-7-52-1	Sepantronium bromide + Epothilone B	Sepantronium bromide + Alpelisib	Epothilone B + JW-7-52-1	Alpelisib + JW-7-52-1	Alpelisib + Epothilone B	GW843682X + Ribociclib	Dactolisib + Ribociclib	Dactolisib + GW843682X	ZG-10 + Ribociclib	ZG-10 + GW843682X	ZG-10 + Dactolisib	Parthenolide + Thapsigargin	LCL161 + Thapsigargin	LCL161 + Parthenolide	Bexarotene + Thapsigargin	Bexarotene + Parthenolide	Bexarotene + LCL161	PHA-665752 + GSK319347A	HG-5-113-01 + GSK319347A	HG-5-113-01 + PHA-665752	Dacinostat + GSK319347A	Dacinostat + PHA-665752	Dacinostat + HG-5-113-01	Z-LLNle-CHO + MG-132	(5Z)-7-Oxozeaenol + MG-132	S-Trityl-L-cysteine + MG-132	(5Z)-7-Oxozeaenol + Z-LLNle-CHO	S-Trityl-L-cysteine + Z-LLNle-CHO	S-Trityl-L-cysteine + (5Z)-7-Oxozeaenol	HG6-64-1 + (5Z)-7-Oxozeaenol	ARRY-520 + (5Z)-7-Oxozeaenol	ICL1100013 + (5Z)-7-Oxozeaenol	ARRY-520 + HG6-64-1	XMD8-85 + (5Z)-7-Oxozeaenol	ICL1100013 + HG6-64-1	QL-XII-61 + (5Z)-7-Oxozeaenol	ICL1100013 + ARRY-520	CGP-082996 + (5Z)-7-Oxozeaenol	WH-4-023 + (5Z)-7-Oxozeaenol
GSE148673	4	ATC267T	Middle	parthenolide	securinine	cefapirin	(+/-)-catechin	celastrol	geldanamycin	tanespimycin	semustine	withaferin A	tolbutamide	nadolol	alvespimycin	monorden	betulin	ciprofibrate	azapropazone	vanoxerine	metformin	5182598	ethaverine	piromidic acid	clebopride	hydrocotarnine	lidocaine	betulinic acid	ioxaglic acid	Prestwick-857	spaglumic acid	spironolactone	benzonatate	midodrine	netilmicin	paromomycin	amiprilose	amantadine	biperiden	folic acid	praziquantel	trimethadione	tolnaftate	megestrol	dienestrol	etofenamate	phenelzine	levonorgestrel	pyrimethamine
[truncated: 5 more columns]

## Sheet: TableS7
Table S7. ICB combinatory treatment sample information
Dataset Name	Sample	Cancer Type	Pre-treatment Sample	Immunotherapy	chemotherapy	Treatment Response	PMID	Reference
SCP1288	P55	RCC	Yes	Anti-PD-1	TKI	Response	33711272	Tumor and immune reprogramming during immunotherapy in advanced renal cell carcinoma
SCP1288	P13	RCC	Yes	Anti-PD-1	TKI	Non-response	33711272	Tumor and immune reprogramming during immunotherapy in advanced renal cell carcinoma
SCP1288	P06	RCC	Yes	Anti-PD-1	TKI	Non-response	33711272	Tumor and immune reprogramming during immunotherapy in advanced renal cell carcinoma
GSE169246	P007	TNBC	Yes	Anti-PD-1	Paclitaxel	Response	34653365	Single-cell analyses reveal key immune cell subsets associated with response to PD-L1 blockade in triple-negative breast cancer
GSE169246	P10	TNBC	Yes	Anti-PD-1	Paclitaxel	Response	34653365	Single-cell analyses reveal key immune cell subsets associated with response to PD-L1 blockade in triple-negative breast cancer
GSE169246	P016	TNBC	Yes	Anti-PD-1	Paclitaxel	Non-response	34653365	Single-cell analyses reveal key immune cell subsets associated with response to PD-L1 blockade in triple-negative breast cancer
GSE169246	P004	TNBC	Yes	Anti-PD-1	Paclitaxel	Non-response	34653365	Single-cell analyses reveal key immune cell subsets associated with response to PD-L1 blockade in triple-negative breast cancer
GSE169246	P016	TNBC	Yes	Anti-PD-1	Paclitaxel	Non-response	34653365	Single-cell analyses reveal key immune cell subsets associated with response to PD-L1 blockade in triple-negative breast cancer
GSE169246	P004	TNBC	Yes	Anti-PD-1	Paclitaxel	Non-response	34653365	Single-cell analyses reveal key immune cell subsets associated with response to PD-L1 blockade in triple-negative breast cancer
